# Supplementary material for: Persistence of Antibiotic Resistance from Agricultural Effluents to Surface Water Revealed in Metagenome Assembled Genomes
Source: Research Square preprint supplement (doi:10.21203/rs.3.rs-1201703/v1), 2022-01-28
Supplement: Supplementary file 1 [file 13ae4917244bb34d563f4832.xlsx]

## Sheet: MAG.groups.ARG.class
Class of Antibiotics								AMINOGLYCOSIDE	AMINOGLYCOSIDE	AMINOGLYCOSIDE	AMINOGLYCOSIDE	AMINOGLYCOSIDE	AMINOGLYCOSIDE	AMINOGLYCOSIDE	AMINOGLYCOSIDE	AMINOGLYCOSIDE	AMINOGLYCOSIDE	AMINOGLYCOSIDE	AMINOGLYCOSIDE	AMINOGLYCOSIDE	AMINOGLYCOSIDE	AMINOGLYCOSIDE	AMINOGLYCOSIDE	AMINOGLYCOSIDE	AMINOGLYCOSIDE	BETA-LACTAM_A	BETA-LACTAM_A	BETA-LACTAM_A	BETA-LACTAM_A	BETA-LACTAM_A	BETA-LACTAM_B	BETA-LACTAM_B	BETA-LACTAM_B	BETA-LACTAM_B	BETA-LACTAM_B	BETA-LACTAM_C	BETA-LACTAM_D	BETA-LACTAM_D	BETA-LACTAM_D	BETA-LACTAM_D	BETA-LACTAM_D	BETA-LACTAM_D	EFFLUX	EFFLUX	EFFLUX	EFFLUX	EFFLUX	EFFLUX	EFFLUX
MAG	Group	Phylum	Class	Order	Family	Genus	Species	ArmA_Rmt	aac(3)	aac(3)-I	aac(6')	aac(6')-I	aacA8	aadA1	aadA11	aadA2	aadA5	aadA6	aadS	aph(2'')-Ia	aph(3'')-Ib	aph(3')	aph(3')-IIIa	aph(3')-Ia	aph(6)-Id	bla(A)	bla-A(A)	blaPAU(A)	blaRAHN(A)	blaSGM(A)	bla(B)	blaDIM(B)	blaJOHN(B)	blaPFM(B)	cphA(B)	ampC(C)	bla(D)	blaOXA(D)	blaOXA-1(D)	blaOXA-10(D)	blaOXA-151(D)	blaOXA-2(D)	ABC_efflux	MFS_efflux	RND_efflux	adeC-adeK-oprM	baeR	emhA	emrB
AJ-2017_refine.222.Bac	Effluent Group	Proteobacteria	Gammaproteobacteria	Pseudomonadales	Moraxellaceae	Acinetobacter	GCF_002135195.1	0	0	0	0	0	0	0	0	0	0	0	0	0	0	0	0	0	0	0	0	0	0	0	0	0	0	0	0	0	0	0	0	0	0	0	2	0	3	1	1	0	0
AJ-2017_refine.227-0.Bac	Effluent Group	Bacteroidota	Bacteroidia	NS11-12g	UBA955	UBA955	unclassified_UBA955	0	0	0	0	0	0	0	0	0	0	0	0	0	0	0	0	0	0	0	0	0	0	0	0	0	0	0	0	0	0	0	0	0	0	0	12	0	0	0	0	0	0
AJ-2017_refine.228-0.Bac	Effluent Group	Proteobacteria	Alphaproteobacteria	Caulobacterales	Caulobacteraceae	Phenylobacterium	unclassified_Phenylobacterium	0	0	0	0	0	0	0	0	0	0	0	0	0	0	1	0	0	0	1	0	0	0	0	2	0	0	0	0	0	0	0	0	0	0	0	2	1	0	0	0	0	0
AJ-2017_refine.255-0.Bac	Effluent Group	Patescibacteria	Saccharimonadia	unclassified_Saccharimonadia	unclassified_Saccharimonadia	unclassified_Saccharimonadia	unclassified_Saccharimonadia	0	0	0	0	0	0	0	0	0	0	0	0	0	0	0	0	0	0	0	0	0	0	0	0	0	0	0	0	0	0	0	0	0	0	0	1	0	0	0	0	0	0
AJ-2017_refine.256.Bac	Effluent Group	Proteobacteria	Alphaproteobacteria	Caulobacterales	Caulobacteraceae	Phenylobacterium	unclassified_Phenylobacterium	0	0	0	0	0	0	0	0	0	0	0	0	0	0	0	0	0	0	1	0	0	0	0	1	0	0	0	0	0	0	0	0	0	0	0	5	2	0	0	0	0	0
AJ-2017_refine.284-0.Bac	Effluent Group	Actinobacteriota	Acidimicrobiia	Microtrichales	Ilumatobacteraceae	UBA2093	unclassified_UBA2093	0	0	0	0	0	0	0	0	0	0	0	0	0	0	0	0	0	0	0	0	0	0	0	0	0	0	0	0	0	0	0	0	0	0	0	3	0	0	0	0	0	0
AJ-2017_refine.363-0.Bac	Effluent Group	Fusobacteriota	Fusobacteriia	Fusobacteriales	Fusobacteriaceae	Cetobacterium_A	unclassified_Cetobacterium_A	0	0	0	0	0	0	0	0	0	0	0	0	0	0	0	0	0	0	0	0	0	0	0	0	0	0	0	0	0	0	0	0	0	0	0	0	0	0	0	0	0	0
AJ-2017_refine.366.Bac	Effluent Group	Verrucomicrobiota	Verrucomicrobiae	Opitutales	UBA953	UBA8828	unclassified_UBA8828	0	0	0	0	0	0	0	0	0	0	0	0	0	0	0	0	0	0	0	0	0	0	0	0	0	0	0	0	0	0	0	0	0	0	0	3	0	0	0	0	0	0
AJ-2017_refine.369-0.Bac	Effluent Group	Planctomycetota	Phycisphaerae	Phycisphaerales	SM1A02	UBA966	unclassified_UBA966	0	0	0	0	0	0	0	0	0	0	0	0	0	0	0	0	0	0	0	0	0	0	0	0	0	0	0	0	0	0	0	0	0	0	0	1	0	0	0	0	0	0
AJ-2017_refine.374.Bac	Effluent Group	Bacteroidota	Bacteroidia	Chitinophagales	Chitinophagaceae	OLB11	unclassified_OLB11	0	0	0	0	0	0	0	0	0	0	0	0	0	0	0	0	0	0	1	0	0	0	0	0	0	0	0	0	0	1	0	0	0	0	0	2	0	0	0	0	0	0
AJ-2017_refine.376.Bac	Effluent Group	Actinobacteriota	Acidimicrobiia	Microtrichales	Ilumatobacteraceae	UBA2093	unclassified_UBA2093	0	0	0	0	0	0	0	0	0	0	0	0	0	0	0	0	0	0	0	0	0	0	0	0	0	0	0	0	0	0	0	0	0	0	0	3	0	0	0	0	0	0
AJ-2017_refine.394-0.Bac	Effluent Group	Bacteroidota	Bacteroidia	Cytophagales	Spirosomaceae	Runella	unclassified_Runella	0	0	0	0	0	0	0	0	0	0	0	0	0	0	0	0	0	0	4	0	0	0	0	1	0	0	0	0	0	0	0	0	0	0	0	3	0	1	0	0	0	0
AJ-2017_refine.412.Bac	Effluent Group	Proteobacteria	Gammaproteobacteria	Betaproteobacteriales	Gallionellaceae	UBA7399	unclassified_UBA7399	0	0	0	0	0	0	0	0	0	0	0	0	0	0	0	0	0	0	0	0	0	0	0	0	0	0	0	0	0	0	0	0	0	0	0	2	0	7	0	0	0	0
AJ-2017_refine.423.Bac	Effluent Group	Proteobacteria	Alphaproteobacteria	Micavibrionales	unclassified_Micavibrionales	unclassified_Micavibrionales	unclassified_Micavibrionales	0	0	0	0	0	0	0	0	0	0	0	0	0	0	0	0	0	0	0	0	0	0	0	0	0	0	0	0	0	0	0	0	0	0	0	2	0	0	0	0	0	0
AJ-2017_refine.426.Bac	Effluent Group	Chloroflexota	Anaerolineae	Thermoflexales	unclassified_Thermoflexales	unclassified_Thermoflexales	unclassified_Thermoflexales	0	1	0	0	1	0	0	0	0	0	0	0	0	0	0	0	0	0	1	0	0	0	0	6	0	0	0	0	0	0	0	0	0	0	0	7	1	0	0	0	0	0
AJ-2017_refine.427.Bac	Effluent Group	Bdellovibrionota	Bdellovibrionia	Bdellovibrionales	UBA1609	unclassified_UBA1609	unclassified_UBA1609	0	0	0	0	0	0	0	0	0	0	0	0	0	0	0	0	0	0	0	0	0	0	0	0	0	0	0	0	0	0	0	0	0	0	0	13	0	2	0	0	0	0
AJ-2017_refine.430.Bac	Effluent Group	Cyanobacteriota	Cyanobacteriia	Cyanobacteriales	Phormidiaceae	Planktothrix	unclassified_Planktothrix	0	0	0	0	0	0	0	0	0	0	0	0	0	0	0	0	0	0	4	0	0	0	0	0	0	0	0	0	0	0	1	0	0	0	0	7	0	0	0	0	0	0
AJ-2017_refine.433.Bac	Effluent Group	Bacteroidota	Kapabacteria	Kapabacteriales	Kapabacteriaceae	UBA10438	unclassified_UBA10438	0	0	0	0	0	0	0	0	0	0	0	0	0	0	0	0	0	0	0	0	0	0	0	0	0	0	0	0	0	0	0	0	0	0	0	2	0	1	0	0	0	0
AJ-2017_refine.435.Bac	Effluent Group	Bacteroidota	Bacteroidia	Chitinophagales	Saprospiraceae	Haliscomenobacter	unclassified_Haliscomenobacter	0	0	0	0	0	0	0	0	0	0	0	0	0	0	0	0	0	0	1	0	0	0	0	2	0	0	0	0	0	0	0	0	0	0	0	4	0	0	0	0	0	0
CJ-2018_refine.306.Bac	Effluent Group	Proteobacteria	Gammaproteobacteria	Betaproteobacteriales	Chromobacteriaceae	Vogesella	unclassified_Vogesella	0	0	0	0	0	0	0	0	0	0	0	0	0	0	0	0	0	0	0	0	0	0	0	0	0	0	0	0	0	0	0	0	0	0	0	5	0	8	0	0	0	0
CJ-2018_refine.308-0.Bac	Effluent Group	Patescibacteria	ABY1	Falkowbacterales	UBA917	UBA917	UBA917 sp1	0	0	0	0	0	0	0	0	0	0	0	0	0	0	0	0	0	0	0	0	0	0	0	0	0	0	0	0	0	0	0	0	0	0	0	0	0	0	0	0	0	0
CJ-2018_refine.316-0.Bac	Effluent Group	Actinobacteriota	Actinobacteria	Corynebacteriales	Corynebacteriaceae	Mycobacterium	unclassified_Mycobacterium	0	0	0	0	0	0	0	0	0	0	0	0	0	0	0	0	0	0	1	0	0	0	0	0	0	0	0	0	0	0	0	0	0	0	0	1	0	0	0	0	0	0
CJ-2018_refine.336.Bac	Effluent Group	Campylobacterota	Campylobacteria	Campylobacterales	Arcobacteraceae	Arcobacter	Arcobacter cryaerophilus	0	0	0	0	0	0	0	0	0	0	0	0	0	0	0	0	0	0	0	0	0	0	0	1	0	0	0	0	0	0	1	0	0	0	0	2	0	1	0	0	0	0
CJ-2018_refine.380-0.Bac	Effluent Group	Proteobacteria	Gammaproteobacteria	Betaproteobacteriales	Rhodocyclaceae	unclassified_Rhodocyclaceae	unclassified_Rhodocyclaceae	0	0	0	0	0	3	0	0	0	0	0	0	0	0	0	0	0	0	0	0	0	0	0	0	0	0	0	0	0	0	0	0	0	0	0	2	0	3	0	0	0	0
CJ-2018_refine.389-0.Bac	Effluent Group	Proteobacteria	Gammaproteobacteria	Betaproteobacteriales	UBA11063	UBA11063	unclassified_UBA11063	0	0	0	0	0	0	0	0	0	0	0	0	0	0	0	0	0	0	1	0	0	0	0	0	0	0	0	0	0	0	0	0	0	0	0	10	0	1	0	0	0	0
CJ-2018_refine.426.Bac	Effluent Group	Patescibacteria	Paceibacteria	UBA9983	UBA5272	UBA5272	unclassified_UBA5272	0	0	0	0	0	0	0	0	0	0	0	0	0	0	0	0	0	0	0	0	0	0	0	0	0	0	0	0	0	0	0	0	0	0	0	0	0	0	0	0	0	0
CJ-2018_refine.434-0.Bac	Effluent Group	Patescibacteria	Paceibacteria	UBA9983	GCA-2401445	unclassified_GCA-2401445	unclassified_GCA-2401445	0	0	0	0	0	0	0	0	0	0	0	0	0	0	0	0	0	0	0	0	0	0	0	0	0	0	0	0	0	0	0	0	0	0	0	0	0	0	0	0	0	0
CJ-2018_refine.437-0.Bac	Effluent Group	Patescibacteria	Gracilibacteria	BD1-5	UBA6164	GCA-2747975	unclassified_GCA-2747975	0	0	0	0	0	0	0	0	0	0	0	0	0	0	0	0	0	0	2	0	0	0	0	0	0	0	0	0	0	0	0	0	0	0	0	0	0	0	0	0	0	0
CJ-2018_refine.467.Bac	Effluent Group	Dependentiae	Babeliae	Babeliales	GCA-2721975	unclassified_GCA-2721975	unclassified_GCA-2721975	0	0	0	0	0	0	0	0	0	0	0	0	0	0	0	0	0	0	0	0	0	0	0	0	0	0	0	0	0	0	0	0	0	0	0	0	0	0	0	0	0	0
CJ-2018_refine.481.Bac	Effluent Group	Omnitrophota	koll11	UBA10015	unclassified_UBA10015	unclassified_UBA10015	unclassified_UBA10015	0	0	0	0	0	0	0	0	0	0	0	0	0	0	0	0	0	0	0	0	0	0	0	0	0	0	0	0	0	7	0	0	0	0	0	2	0	0	0	0	0	0
CJ-2018_refine.496.Bac	Effluent Group	Proteobacteria	Gammaproteobacteria	Betaproteobacteriales	Burkholderiaceae	unclassified_Burkholderiaceae	unclassified_Burkholderiaceae	0	0	0	0	0	0	0	0	0	0	0	0	0	0	0	0	0	0	0	0	0	0	0	0	0	0	0	0	0	0	0	0	0	0	0	2	0	0	0	0	0	0
CJ-2018_refine.497.Bac	Effluent Group	Patescibacteria	Paceibacteria	UBA9983	Taylorbacteraceae	unclassified_Taylorbacteraceae	unclassified_Taylorbacteraceae	0	0	0	0	0	0	0	0	0	0	0	0	0	0	0	0	0	0	1	0	0	0	0	0	0	0	0	0	0	0	0	0	0	0	0	1	0	0	0	0	0	0
CJ-2018_refine.500-0.Bac	Effluent Group	Patescibacteria	Paceibacteria	UBA9983	Kaiserbacteraceae	HO2-49-34	unclassified_HO2-49-34	0	0	0	0	0	0	0	0	0	0	0	0	0	0	0	0	0	0	0	0	0	0	0	0	0	0	0	0	0	0	0	0	0	0	0	0	0	0	0	0	0	0
CJ-2018_refine.510.Bac	Effluent Group	Patescibacteria	Gracilibacteria	Peribacterales	Peribacteraceae	unclassified_Peribacteraceae	unclassified_Peribacteraceae	0	0	0	0	0	0	0	0	0	0	0	0	0	0	0	0	0	0	0	0	0	0	0	0	0	0	0	0	0	0	0	0	0	0	0	0	0	0	0	0	0	0
CJ-2018_refine.517.Bac	Effluent Group	Actinobacteriota	Actinobacteria	Nanopelagicales	UBA10799	UBA10799	unclassified_UBA10799	0	0	0	0	0	0	0	0	0	0	0	0	0	0	0	0	0	0	0	0	0	0	0	0	0	0	0	0	0	0	0	0	0	0	0	2	0	0	0	0	0	0
CJ-2018_refine.521	Effluent Group	Patescibacteria	Microgenomatia	UBA1400	Collierbacteraceae	unclassified_Collierbacteraceae	unclassified_Collierbacteraceae	0	0	0	0	0	0	0	0	0	0	0	0	0	0	0	0	0	0	0	0	0	0	0	0	0	0	0	0	0	0	0	0	0	0	0	0	0	0	0	0	0	0
CJ-2018_refine.529.Bac	Effluent Group	Patescibacteria	Paceibacteria	UBA9983	UBA5272	UBA5272	unclassified_UBA5272	0	0	0	0	0	0	0	0	0	0	0	0	0	0	0	0	0	0	0	0	0	0	0	0	0	0	0	0	0	0	0	0	0	0	0	0	0	0	0	0	0	0
CJ-2018_refine.537-0.Bac	Effluent Group	Patescibacteria	ABY1	Magasanikibacterales	UBA922	2-12-FULL-41-16	unclassified_2-12-FULL-41-16	0	0	0	0	0	0	0	0	0	0	0	0	0	0	0	0	0	0	0	0	0	0	0	0	0	0	0	0	0	0	0	0	0	0	0	5	0	0	0	0	0	0
CJ-2018_refine.538-	Effluent Group	Proteobacteria	Alphaproteobacteria	Micavibrionales	unclassified_Micavibrionales	unclassified_Micavibrionales	unclassified_Micavibrionales	0	0	0	0	0	0	0	0	0	0	0	0	0	0	0	0	0	0	0	0	0	0	0	0	0	0	0	0	0	0	0	0	0	0	0	0	0	0	0	0	0	0
CJ-2018_refine.541-0.Bac	Effluent Group	Patescibacteria	Saccharimonadia	Saccharimonadales	UBA10212	unclassified_UBA10212	unclassified_UBA10212	0	0	0	0	0	0	0	0	0	0	0	0	0	0	0	0	0	0	8	0	0	0	0	0	0	0	0	0	0	0	0	0	0	0	0	12	0	0	0	0	0	0
CJ-2018_refine.545.Ba	Effluent Group	Bdellovibrionota	Bdellovibrionia	Bdellovibrionales	Bdellovibrionaceae	unclassified_Bdellovibrionaceae	unclassified_Bdellovibrionaceae	0	0	0	0	0	0	0	0	0	0	0	0	0	0	0	0	0	0	0	0	0	0	0	1	0	0	0	0	0	0	0	0	0	0	0	4	1	0	0	0	0	0
CJ-2018_refine.547-0.Bac	Effluent Group	Bacteroidota	Bacteroidia	Bacteroidales	UBA932	DMER64	unclassified_DMER64	0	0	0	0	0	0	0	0	0	0	0	0	0	0	0	0	0	0	0	0	0	0	0	0	0	0	0	0	0	0	0	0	0	0	0	1	0	0	0	0	0	0
CJ-2018_refine.556.Bac	Effluent Group	Patescibacteria	ABY1	Uhrbacterales	GWF2-40-263	2-01-FULL-63-20	unclassified_2-01-FULL-63-20	0	0	0	0	0	0	0	0	0	0	0	0	0	0	0	0	0	0	0	0	0	0	0	0	0	0	0	0	0	0	0	0	0	0	0	1	0	0	0	0	0	0
CJ-2018_refine.562-	Effluent Group	Patescibacteria	Gracilibacteria	Peregrinibacterales	2-02-FULL-48-14	unclassified_2-02-FULL-48-14	unclassified_2-02-FULL-48-14	0	0	0	0	0	0	0	0	0	0	0	0	0	0	0	0	0	0	0	0	0	0	0	0	0	0	0	0	0	0	0	0	0	0	0	1	0	0	0	0	0	0
CJ-2018_refine.563-	Effluent Group	Patescibacteria	ABY1	Uhrbacterales	unclassified_Uhrbacterales	unclassified_Uhrbacterales	unclassified_Uhrbacterales	0	0	0	0	0	0	0	0	0	0	0	0	0	0	0	0	0	0	0	0	0	0	0	0	0	0	0	0	0	0	0	0	0	0	0	0	0	0	0	0	0	0
CJ-2018_refine.564-0.Bac	Effluent Group	Patescibacteria	Saccharimonadia	Saccharimonadales	Saccharimonadaceae	Saccharimonas	unclassified_Saccharimonas	0	0	0	0	0	0	0	0	0	0	0	0	0	0	0	0	0	0	0	0	0	0	0	0	0	0	0	0	0	0	0	0	0	0	0	1	0	0	0	0	0	0
CJ-2018_refine.565.Bac	Effluent Group	Patescibacteria	Paceibacteria	Moranbacterales	UBA1568	unclassified_UBA1568	unclassified_UBA1568	0	0	0	0	0	0	0	0	0	0	0	0	0	0	0	0	0	0	0	0	0	0	0	0	0	0	0	0	0	0	0	0	0	0	0	1	0	0	0	0	0	0
CJ-2018_refine.567-0.Bac	Effluent Group	Patescibacteria	Paceibacteria	UBA9983	GCA-2401445	unclassified_GCA-2401445	unclassified_GCA-2401445	0	0	0	0	0	0	0	0	0	0	0	0	0	0	0	0	0	0	2	0	0	0	0	0	0	0	0	0	0	0	0	0	0	0	0	0	0	0	0	0	0	0
CJ-2018_refine.569-	Effluent Group	Patescibacteria	ABY1	Kerfeldbacterales	XYC2-FULL-38-9	unclassified_XYC2-FULL-38-9	unclassified_XYC2-FULL-38-9	0	0	0	0	0	0	0	0	0	0	0	0	0	0	0	0	0	0	0	0	0	0	0	0	0	0	0	0	0	0	0	0	0	0	0	0	0	0	0	0	0	0
CJ-2018_refine.572-	Effluent Group	Patescibacteria	Paceibacteria	Moranbacterales	UBA1568	UBA1568	unclassified_UBA1568	0	1	0	0	0	0	0	0	0	0	0	0	0	0	0	0	0	0	0	0	0	0	0	0	0	0	0	0	0	0	0	0	0	0	0	5	0	0	0	0	0	0
CJ-2018_refine.578.Bac	Effluent Group	Verrucomicrobiota	Verrucomicrobiae	Chthoniobacterales	UBA6821	unclassified_UBA6821	unclassified_UBA6821	0	0	0	0	0	0	0	0	0	0	0	0	0	0	0	0	0	0	5	0	0	0	0	0	0	0	0	0	0	0	0	0	0	0	0	3	0	0	0	0	0	0
CJ-2018_refine.580-0.Bac	Effluent Group	Patescibacteria	Paceibacteria	UBA9983	Kaiserbacteraceae	C7867-001	unclassified_C7867-001	0	0	0	0	0	0	0	0	0	0	0	0	0	0	0	0	0	0	3	0	0	0	0	0	0	0	0	0	0	0	0	0	0	0	0	2	0	0	0	0	0	0
CJ-2018_refine.581.Bac	Effluent Group	Omnitrophota	koll11	UBA10015	unclassified_UBA10015	unclassified_UBA10015	unclassified_UBA10015	0	0	0	0	0	0	0	0	0	0	0	0	0	0	0	0	0	0	0	0	0	0	0	0	0	0	0	0	0	0	0	0	0	0	0	2	0	0	0	0	0	0
CJ-2018_refine.583.Bac	Effluent Group	Desulfobacterota	Syntrophia	Syntrophales	Smithellaceae	UBA8904	unclassified_UBA8904	0	0	0	0	0	0	0	0	0	0	0	0	0	0	0	0	0	0	0	0	0	0	0	2	0	0	0	0	0	0	0	0	0	0	0	2	0	1	0	0	0	0
CJ-2018_refine.586-0.Bac	Effluent Group	Patescibacteria	ABY1	Falkowbacterales	UBA917	UBA919	unclassified_UBA919	0	0	0	0	0	0	0	0	0	0	0	0	0	0	0	0	0	0	19	0	0	0	0	0	0	0	0	0	0	0	0	0	0	0	0	0	0	0	0	0	0	0
CJ-2018_refine.589.Bac	Effluent Group	Patescibacteria	Paceibacteria	UBA9983	GCA-2401445	unclassified_GCA-2401445	unclassified_GCA-2401445	0	0	0	0	0	0	0	0	0	0	0	0	0	0	0	0	0	0	3	0	0	0	0	0	0	0	0	0	0	0	0	0	0	0	0	0	0	0	0	0	0	0
CJ-2018_refine.591.Bac	Effluent Group	Patescibacteria	ABY1	Magasanikibacterales	GCA-002688135	unclassified_GCA-002688135	unclassified_GCA-002688135	0	0	0	0	0	0	0	0	0	0	0	0	0	0	0	0	0	0	0	0	0	0	0	0	0	0	0	0	0	0	0	0	0	0	0	0	0	0	0	0	0	0
CJ-2018_refine.595.Bac	Effluent Group	Omnitrophota	UBA9649	2-02-FULL-51-18	unclassified_2-02-FULL-51-18	unclassified_2-02-FULL-51-18	unclassified_2-02-FULL-51-18	0	0	0	0	0	0	0	0	0	0	0	0	0	0	0	0	0	0	2	0	0	0	0	0	0	0	0	0	0	0	0	0	0	0	0	1	0	7	0	0	0	0
CJ-2018_refine.597-0	Effluent Group	Patescibacteria	Doudnabacteria	UBA920	UBA920	unclassified_UBA920	unclassified_UBA920	0	0	0	0	0	0	0	0	0	0	0	0	0	0	0	0	0	0	0	0	0	0	0	0	0	0	0	0	0	0	0	0	0	0	0	0	0	0	0	0	0	0
CJ-2018_refine.598-0.Bac	Effluent Group	Omnitrophota	koll11	UBA10015	GCA-002753745	unclassified_GCA-002753745	unclassified_GCA-002753745	0	0	0	0	0	0	0	0	0	0	0	0	0	0	0	0	0	0	2	0	0	0	0	0	0	0	0	0	0	0	0	0	0	0	0	2	0	2	0	0	0	0
CJ-2018_refine.600-0.Bac	Effluent Group	Omnitrophota	koll11	UBA10015	kpj58rc	unclassified_kpj58rc	unclassified_kpj58rc	0	0	0	0	0	0	0	0	0	0	0	0	0	0	0	0	0	0	0	0	0	0	0	0	0	0	0	0	0	0	0	0	0	0	0	1	0	0	0	0	0	0
CJ-2018_refine.604.Bac	Effluent Group	Patescibacteria	ABY1	Magasanikibacterales	GWA2-37-8	2-02-FULL-45-10	unclassified_2-02-FULL-45-10	0	0	0	0	0	0	0	0	0	0	0	0	0	0	0	0	0	0	1	0	0	0	0	0	0	0	0	0	0	0	0	0	0	0	0	0	0	0	0	0	0	0
CJ-2018_refine.606.Bac	Effluent Group	Patescibacteria	ABY1	Falkowbacterales	UBA917	unclassified_UBA917	unclassified_UBA917	0	0	0	0	0	0	0	0	0	0	0	0	0	0	0	0	0	0	0	0	0	0	0	0	0	0	0	0	0	0	0	0	0	0	0	0	0	0	0	0	0	0
CJ-2018_refine.616-0	Effluent Group	Patescibacteria	Paceibacteria	Moranbacterales	UBA1568	unclassified_UBA1568	unclassified_UBA1568	0	0	0	0	0	0	0	0	0	0	0	0	0	0	0	0	0	0	0	0	0	0	0	0	0	0	0	0	0	0	0	0	0	0	0	1	0	0	0	0	0	0
CJ-2018_refine.617.Bac	Effluent Group	Patescibacteria	Paceibacteria	UBA6257	2-01-FULL-56-20	unclassified_2-01-FULL-56-20	unclassified_2-01-FULL-56-20	0	0	0	0	0	0	0	0	0	0	0	0	0	0	0	0	0	0	0	0	0	0	0	0	0	0	0	0	0	0	0	0	0	0	0	0	0	0	0	0	0	0
CJ-2018_refine.619-0.Bac	Effluent Group	Patescibacteria	Doudnabacteria	UBA920	UBA920	unclassified_UBA920	unclassified_UBA920	0	0	0	0	0	0	0	0	0	0	0	0	0	0	0	0	0	0	2	0	0	0	0	0	0	0	0	0	0	0	0	0	0	0	0	0	0	0	0	0	0	0
CJ-2018_refine.621-0.Bac	Effluent Group	Patescibacteria	Paceibacteria	UBA9983	Kaiserbacteraceae	GWA1-54-10	unclassified_GWA1-54-10	0	0	0	0	0	0	0	0	0	0	0	0	0	0	0	0	0	0	0	0	0	0	0	0	0	0	0	0	0	0	0	0	0	0	0	0	0	0	0	0	0	0
CJ-2018_refine.627.Bac	Effluent Group	Patescibacteria	ABY1	Uhrbacterales	2-12-FULL-60-25	21-14-all-47-17	unclassified_21-14-all-47-17	0	0	0	0	0	0	0	0	0	0	0	0	0	0	0	0	0	0	0	0	0	0	0	0	0	0	0	0	0	0	0	0	0	0	0	2	0	0	0	0	0	0
CJ-2018_refine.634-0.Bac	Effluent Group	Omnitrophota	koll11	UBA10015	GCA-002753745	unclassified_GCA-002753745	unclassified_GCA-002753745	0	0	0	0	0	0	0	0	0	0	0	0	0	0	0	0	0	0	0	0	0	0	0	0	0	0	0	0	0	0	0	0	0	0	0	0	0	1	0	0	0	0
CJ-2018_refine.637-0.Bac	Effluent Group	Omnitrophota	koll11	GIF10	UBA6249	unclassified_UBA6249	unclassified_UBA6249	0	0	0	0	0	0	0	0	0	0	0	0	0	0	0	0	0	0	1	0	0	0	0	0	0	0	0	0	0	0	0	0	0	0	0	1	0	0	0	0	0	0
CJ-2018_refine.638.Bac	Effluent Group	Omnitrophota	koll11	GIF10	UBA6249	unclassified_UBA6249	unclassified_UBA6249	0	0	0	0	0	0	0	0	0	0	0	0	0	0	0	0	0	0	8	0	0	0	0	0	0	0	0	0	0	0	0	0	0	0	0	4	0	10	0	0	0	0
CJ-2018_refine.640.Bac	Effluent Group	Bdellovibrionota	UBA2394	UBA2428	UBA2428	unclassified_UBA2428	unclassified_UBA2428	0	0	0	0	0	0	0	0	0	0	0	0	0	0	0	0	0	0	0	0	0	0	0	0	0	0	0	0	0	0	0	0	0	0	0	1	1	0	0	0	0	0
CJ-2018_refine.642-0.Bac	Effluent Group	Patescibacteria	Paceibacteria	UBA9983	Kaiserbacteraceae	unclassified_Kaiserbacteraceae	unclassified_Kaiserbacteraceae	0	0	0	0	0	0	0	0	0	0	0	0	0	0	0	0	0	0	1	0	0	0	0	0	0	0	0	0	0	0	0	0	0	0	0	1	0	0	0	0	0	0
CJ-2018_refine.649-0.Bac	Effluent Group	Omnitrophota	Omnitrophia	Omnitrophales	GWA2-52-8	unclassified_GWA2-52-8	unclassified_GWA2-52-8	0	0	0	0	0	0	0	0	0	0	0	0	0	0	0	0	0	0	0	0	0	0	0	0	0	0	0	0	0	0	0	0	0	0	0	1	0	0	0	0	0	0
CJ-2018_refine.651.Bac	Effluent Group	Patescibacteria	Microgenomatia	Levybacterales	UBA12049	unclassified_UBA12049	unclassified_UBA12049	0	0	0	0	0	0	0	0	0	0	0	0	0	0	0	0	0	0	17	0	0	0	0	0	0	0	0	0	0	0	0	0	0	0	0	2	0	0	0	0	0	0
CJ-2018_refine.652-0.Bac	Effluent Group	Omnitrophota	koll11	GIF10	UBA6249	GCA-002774445	unclassified_GCA-002774445	0	0	0	0	0	0	0	0	0	0	0	0	0	0	0	0	0	0	1	0	0	0	0	0	0	0	0	0	0	0	0	0	0	0	0	1	0	0	0	0	0	0
CJ-2018_refine.654.Bac	Effluent Group	Omnitrophota	koll11	UBA1560	unclassified_UBA1560	unclassified_UBA1560	unclassified_UBA1560	0	0	0	0	0	0	0	0	0	0	0	0	0	0	0	0	0	0	1	0	0	0	0	0	0	0	0	0	0	0	0	0	0	0	0	1	0	0	0	0	0	0
G-2016_refine.412.Bac	Effluent Group	Proteobacteria	Gammaproteobacteria	Betaproteobacteriales	Burkholderiaceae	SCN-69-89	unclassified_SCN-69-89	0	0	0	0	0	0	0	0	0	0	0	0	0	0	0	0	0	0	0	0	0	0	0	1	0	0	0	0	0	0	0	0	0	0	0	5	0	2	0	0	0	0
G-2016_refine.423-0.Bac	Effluent Group	Proteobacteria	Alphaproteobacteria	Rhodobacterales	Rhodobacteraceae	Gemmobacter_A	Gemmobacter_A nectariphilus	0	0	0	0	0	0	0	0	0	0	0	0	0	0	0	0	0	0	1	0	0	0	0	2	0	0	0	0	0	0	0	0	0	0	0	4	0	1	0	0	0	0
G-2016_refine.425.Bac	Effluent Group	Proteobacteria	Alphaproteobacteria	Rhizobiales	Xanthobacteraceae	Xanthobacter	unclassified_Xanthobacter	0	0	0	0	0	0	0	0	0	0	0	0	0	0	0	0	0	0	0	0	0	0	0	2	0	0	0	0	0	0	0	0	0	0	0	3	0	3	0	0	0	0
G-2016_refine.435.Bac	Effluent Group	Patescibacteria	Paceibacteria	UBA9983	Vogelbacteraceae	unclassified_Vogelbacteraceae	unclassified_Vogelbacteraceae	0	0	0	0	0	0	0	0	0	0	0	0	0	0	0	0	0	0	0	0	0	0	0	0	0	0	0	0	0	0	0	0	0	0	0	0	0	0	0	0	0	0
G-2016_refine.444.Bac	Effluent Group	Proteobacteria	Alphaproteobacteria	Acetobacterales	Acetobacteraceae	Elioraea	unclassified_Elioraea	0	0	0	0	0	0	0	0	0	0	0	0	0	0	0	0	0	0	0	0	0	0	0	0	0	0	0	0	0	0	0	0	0	0	0	4	0	0	0	0	0	0
G-2016_refine.446.Bac	Effluent Group	Verrucomicrobiota	Verrucomicrobiae	Opitutales	Opitutaceae	IMCC26134	unclassified_IMCC26134	0	0	0	0	0	0	0	0	0	0	0	0	0	0	0	0	0	0	0	0	0	0	0	1	0	0	0	0	0	0	0	0	0	0	0	5	0	12	0	0	0	0
G-2016_refine.460.Bac	Effluent Group	Bacteroidota	Bacteroidia	Flavobacteriales	PHOS-HE28	PHOS-HE28	unclassified_PHOS-HE28	0	1	0	0	0	0	0	0	0	0	0	0	0	0	0	0	0	0	0	0	0	0	0	0	0	0	0	0	0	0	0	0	0	0	0	13	0	0	0	0	0	0
G-2016_refine.468-0.Bac	Effluent Group	Bacteroidota	Bacteroidia	Flavobacteriales	UBA10066	unclassified_UBA10066	unclassified_UBA10066	0	0	0	0	0	0	0	0	0	0	0	0	0	0	0	0	0	0	0	0	0	0	0	0	0	0	0	0	0	0	0	0	0	0	0	3	0	0	0	0	0	0
G-2016_refine.484.Bac	Effluent Group	Proteobacteria	Gammaproteobacteria	Xanthomonadales	unclassified_Xanthomonadales	unclassified_Xanthomonadales	unclassified_Xanthomonadales	0	0	8	0	0	0	0	0	0	0	0	0	0	0	0	0	0	0	0	0	0	0	0	0	0	0	0	0	0	1	0	0	0	0	0	9	9	4	0	0	0	0
G-2016_refine.493-0.Bac	Effluent Group	Proteobacteria	Gammaproteobacteria	Enterobacterales	Alteromonadaceae	Rheinheimera_A	unclassified_Rheinheimera_A	0	1	0	0	0	0	0	0	0	0	0	0	0	0	0	0	0	0	0	0	0	0	0	1	0	0	0	0	1	0	0	0	0	0	0	2	0	2	0	0	0	0
G-2016_refine.496.Bac	Effluent Group	Bdellovibrionota	Bdellovibrionia	Bdellovibrionales	Bdellovibrionaceae	unclassified_Bdellovibrionaceae	unclassified_Bdellovibrionaceae	0	0	0	0	0	0	0	0	0	0	0	0	0	0	0	0	0	0	0	0	0	0	0	0	0	0	0	0	0	0	0	0	0	0	0	2	0	0	0	0	0	0
G-2016_refine.503.Bac	Effluent Group	Patescibacteria	Paceibacteria	UBA9983	Taylorbacteraceae	unclassified_Taylorbacteraceae	unclassified_Taylorbacteraceae	0	0	0	0	0	0	0	0	0	0	0	0	0	0	0	0	0	0	0	0	0	0	0	0	0	0	0	0	0	0	0	0	0	0	0	1	0	0	0	0	0	0
G-2016_refine.506.Bac	Effluent Group	Bacteroidota	Bacteroidia	NS11-12g	UBA8524	unclassified_UBA8524	unclassified_UBA8524	0	0	0	0	0	0	0	0	0	0	0	0	0	0	0	0	0	0	0	0	0	0	0	2	0	0	0	0	0	0	0	0	0	0	0	2	0	0	0	0	0	0
G-2016_refine.507.Bac	Effluent Group	Patescibacteria	Paceibacteria	UBA9983	21-14-all-36-13	unclassified_21-14-all-36-13	unclassified_21-14-all-36-13	0	0	0	0	0	0	0	0	0	0	0	0	0	0	0	0	0	0	0	0	0	0	0	0	0	0	0	0	0	0	0	0	0	0	0	15	0	0	0	0	0	0
G-2016_refine.512.Bac	Effluent Group	Nitrospirota	Nitrospiria	Nitrospirales	Nitrospiraceae	Nitrospira_A	unclassified_Nitrospira_A	0	0	0	0	0	0	0	0	0	0	0	0	0	0	0	0	0	0	1	0	0	0	0	0	0	0	0	0	0	0	0	0	0	0	0	6	0	2	0	0	0	0
G-2016_refine.514.Bac	Effluent Group	Bdellovibrionota	Bdellovibrionia	Bdellovibrionales	Bdellovibrionaceae	unclassified_Bdellovibrionaceae	unclassified_Bdellovibrionaceae	0	0	0	0	0	0	0	0	0	0	0	0	0	0	0	0	0	0	1	0	0	0	0	0	0	0	0	0	0	0	0	0	0	0	0	6	0	0	0	0	0	0
G-2016_refine.517-0.Bac	Effluent Group	Proteobacteria	Alphaproteobacteria	Rickettsiales	unclassified_Rickettsiales	unclassified_Rickettsiales	unclassified_Rickettsiales	0	0	0	0	0	0	0	0	0	0	0	0	0	0	0	0	0	0	0	0	0	0	0	0	0	0	0	0	0	0	3	0	0	0	0	16	0	0	0	0	0	0
G-2016_refine.520.Bac	Effluent Group	Proteobacteria	Alphaproteobacteria	unclassified_Alphaproteobacteria	unclassified_Alphaproteobacteria	unclassified_Alphaproteobacteria	unclassified_Alphaproteobacteria	0	0	0	0	0	0	0	0	0	0	0	0	0	0	0	0	0	0	0	0	0	0	0	0	0	0	0	0	0	0	0	0	0	0	0	7	0	14	0	0	0	0
G-2016_refine.523.Bac	Effluent Group	Proteobacteria	Alphaproteobacteria	unclassified_Alphaproteobacteria	unclassified_Alphaproteobacteria	unclassified_Alphaproteobacteria	unclassified_Alphaproteobacteria	0	0	0	0	0	0	0	0	0	0	0	0	0	0	0	0	0	0	0	0	0	0	0	0	0	0	0	0	0	0	0	0	0	0	0	9	0	0	0	0	0	0
G-2016_refine.524-0.Bac	Effluent Group	Patescibacteria	Dojkabacteria	SC72	SC72	UBA5209	GCA_002840365.1	0	0	0	0	0	0	0	0	0	0	0	0	0	0	0	0	0	0	1	0	0	0	0	0	0	0	0	0	0	0	0	0	0	0	0	0	0	0	0	0	0	0
G-2016_refine.525.Bac	Effluent Group	Planctomycetota	Phycisphaerae	Phycisphaerales	SM1A02	UBA2402	unclassified_UBA2402	0	0	0	0	0	0	0	0	0	0	0	0	0	0	0	0	0	0	0	0	0	0	0	0	0	0	0	0	0	0	0	0	0	0	0	1	0	0	0	0	0	0
G-2016_refine.528.Bac	Effluent Group	Proteobacteria	Alphaproteobacteria	UBA1280	UBA6156	UBA6156	unclassified_UBA6156	0	0	0	0	0	0	0	0	0	0	0	0	0	0	0	0	0	0	0	0	0	0	0	0	0	0	0	0	0	0	0	0	0	0	0	27	0	3	0	0	0	0
G-2016_refine.530.Bac	Effluent Group	Proteobacteria	Gammaproteobacteria	Chromatiales	Chromatiaceae	Thiocapsa	unclassified_Thiocapsa	0	0	0	0	0	0	0	0	0	0	0	0	0	0	0	0	0	0	0	0	0	0	0	0	0	0	0	0	0	0	0	0	0	0	0	2	0	1	0	0	0	0
G-2016_refine.531.Bac	Effluent Group	Proteobacteria	Gammaproteobacteria	Betaproteobacteriales	Burkholderiaceae	GJ-E10	unclassified_GJ-E10	0	0	0	0	0	0	0	0	0	0	0	0	0	0	0	0	0	0	0	0	0	0	0	3	0	0	0	0	0	0	0	0	0	0	0	2	0	3	0	0	0	0
G-2016_refine.535-0.Bac	Effluent Group	Patescibacteria	Paceibacteria	UBA9983	Nomurabacteraceae	unclassified_Nomurabacteraceae	unclassified_Nomurabacteraceae	0	0	0	0	0	0	0	0	0	0	0	0	0	0	0	0	0	0	7	0	0	0	0	0	0	0	0	0	0	0	0	0	0	0	0	12	0	0	0	0	0	0
G-2016_refine.536.Bac	Effluent Group	Bacteroidota	Rhodothermia	Balneolales	unclassified_Balneolales	unclassified_Balneolales	unclassified_Balneolales	0	0	0	0	0	0	0	0	0	0	0	0	0	0	0	0	0	0	2	0	0	0	0	1	0	0	0	0	0	0	0	0	0	0	0	3	0	0	0	0	0	0
G-2016_refine.543.Bac	Effluent Group	Proteobacteria	Gammaproteobacteria	Betaproteobacteriales	Nitrosomonadaceae	Nitrosomonas	unclassified_Nitrosomonas	0	1	0	0	0	0	0	0	0	0	0	0	0	0	0	0	0	0	0	0	0	0	0	0	0	0	0	0	0	0	0	0	0	0	0	5	0	1	0	0	0	0
G-2016_refine.545.Bac	Effluent Group	Myxococcota	unclassified_Myxococcota	unclassified_Myxococcota	unclassified_Myxococcota	unclassified_Myxococcota	unclassified_Myxococcota	0	0	0	0	0	0	0	0	0	0	0	0	0	0	0	0	0	0	2	0	0	0	0	0	0	0	0	0	0	0	0	0	0	0	0	3	1	1	0	0	0	0
G-2016_refine.546.Bac	Effluent Group	Dependentiae	Babeliae	Babeliales	Vermiphilaceae	unclassified_Vermiphilaceae	unclassified_Vermiphilaceae	0	0	0	0	0	0	0	0	0	0	0	0	0	0	0	0	0	0	0	0	0	0	0	0	0	0	0	0	0	0	0	0	0	0	0	3	0	0	0	0	0	0
G-2016_refine.549.Bac	Effluent Group	Patescibacteria	Microgenomatia	UBA1400	Pacebacteraceae	unclassified_Pacebacteraceae	unclassified_Pacebacteraceae	0	0	0	0	0	0	0	0	0	0	0	0	0	0	0	0	0	0	0	0	0	0	0	0	0	0	0	0	0	0	0	0	0	0	0	2	0	0	0	0	0	0
G-2016_refine.550.Bac	Effluent Group	Proteobacteria	Gammaproteobacteria	Betaproteobacteriales	Burkholderiaceae	SCGC-AAA027-K21	unclassified_SCGC-AAA027-K21	0	0	0	0	0	0	0	0	0	0	0	0	0	0	0	0	0	0	0	0	0	0	0	0	0	0	0	0	0	0	0	0	0	0	0	2	0	0	0	0	0	0
G-2016_refine.552.Bac	Effluent Group	Proteobacteria	Gammaproteobacteria	Pseudomonadales	Moraxellaceae	UBA2032	unclassified_UBA2032	0	0	0	0	0	0	0	0	0	0	0	0	0	0	0	0	0	0	0	0	0	0	0	0	0	0	0	0	0	0	5	0	0	0	0	13	1	1	0	0	0	0
G-2016_refine.557.Bac	Effluent Group	Bdellovibrionota	Bdellovibrionia	unclassified_Bdellovibrionia	unclassified_Bdellovibrionia	unclassified_Bdellovibrionia	unclassified_Bdellovibrionia	0	0	0	0	0	0	0	0	0	0	0	0	0	0	0	0	0	0	1	0	0	0	0	0	0	0	0	0	0	0	0	0	0	0	0	2	0	1	0	0	0	0
G-2016_refine.558-0.Bac	Effluent Group	Acidobacteriota	Thermoanaerobaculia	UBA5704	unclassified_UBA5704	unclassified_UBA5704	unclassified_UBA5704	0	0	0	0	0	0	0	0	0	0	0	0	0	0	0	0	0	0	0	0	0	0	0	3	0	0	0	0	0	0	0	0	0	0	0	1	1	0	0	0	0	0
G-2016_refine.561-0.Bac	Effluent Group	Bacteroidota	Bacteroidia	Cytophagales	Cyclobacteriaceae	ELB16-189	unclassified_ELB16-189	0	0	0	0	0	0	0	0	0	0	0	0	0	0	0	0	0	0	1	0	0	0	0	0	0	0	0	0	0	0	0	0	0	0	0	5	1	0	0	0	0	0
G-2016_refine.564.Bac	Effluent Group	Bacteroidota	Bacteroidia	Cytophagales	Cyclobacteriaceae	unclassified_Cyclobacteriaceae	unclassified_Cyclobacteriaceae	0	0	0	0	0	0	0	0	0	0	0	0	0	0	0	0	0	0	0	0	0	0	0	2	0	0	0	0	0	0	0	0	0	0	0	9	0	0	0	0	0	0
G-2016_refine.565.Bac	Effluent Group	Proteobacteria	Gammaproteobacteria	Pseudomonadales	Saccharospirillaceae	UBA2009	unclassified_UBA2009	0	0	0	0	0	0	0	0	0	0	0	0	0	0	0	0	0	0	0	0	0	0	0	0	0	0	0	0	0	0	0	0	0	0	0	2	0	1	0	0	0	0
G-2016_refine.567-0.Bac	Effluent Group	Bacteroidota	Bacteroidia	Cytophagales	Cyclobacteriaceae	Mariniradius	unclassified_Mariniradius	0	0	0	0	0	0	0	0	0	0	0	0	0	0	0	0	0	0	0	0	0	0	0	3	0	0	0	0	0	0	0	0	0	0	0	3	0	1	0	0	0	0
G-2016_refine.569-0.Bac	Effluent Group	Bdellovibrionota	Bdellovibrionia	Bdellovibrionales	Bdellovibrionaceae	Ga0074139	unclassified_Ga0074139	0	0	0	0	0	0	0	0	0	0	0	0	0	0	0	0	0	0	2	0	0	0	0	0	0	0	0	0	0	0	0	0	0	0	0	2	0	0	0	0	0	0
G-2016_refine.575.Bac	Effluent Group	Bacteroidota	Bacteroidia	Bacteroidales	Paludibacteraceae	Paludibacter	unclassified_Paludibacter	0	0	0	0	0	0	0	0	0	0	0	0	0	0	0	0	0	0	0	0	0	0	0	0	0	0	0	0	0	0	0	0	0	0	0	17	0	0	0	0	0	0
G-2016_refine.576.Bac	Effluent Group	Bdellovibrionota	Bacteriovoracia	UBA1018	UBA923	unclassified_UBA923	unclassified_UBA923	0	0	0	0	0	0	0	0	0	0	0	0	0	0	0	0	0	0	0	0	0	0	0	0	0	0	0	0	0	0	0	0	0	0	0	2	1	2	0	0	0	0
G-2016_refine.586-0.Bac	Effluent Group	Patescibacteria	ABY1	Magasanikibacterales	UBA922	UBA922	unclassified_UBA922	0	0	0	0	0	0	0	0	0	0	0	0	0	0	0	0	0	0	1	0	0	0	0	0	0	0	0	0	0	0	0	0	0	0	0	1	0	0	0	0	0	0
G-2016_refine.588-0.Bac	Effluent Group	Bdellovibrionota	Bacteriovoracia	UBA1018	UBA1018	unclassified_UBA1018	unclassified_UBA1018	0	0	0	0	0	0	0	0	0	0	0	0	0	0	0	0	0	0	1	0	0	0	0	0	0	0	0	0	0	0	0	0	0	0	0	1	0	1	0	0	0	0
G-2016_refine.590.Bac	Effluent Group	Cyanobacteriota	Vampirovibrionia	Obscuribacterales	Obscuribacteraceae	unclassified_Obscuribacteraceae	unclassified_Obscuribacteraceae	0	0	0	0	4	0	0	0	0	0	0	0	0	0	0	0	0	0	13	0	0	0	0	1	0	0	0	0	0	17	0	0	0	0	0	2	0	0	0	0	0	0
G-2016_refine.591.Bac	Effluent Group	Firmicutes	Bacilli	Acholeplasmatales	Acholeplasmataceae	UBA2284	unclassified_UBA2284	0	0	0	0	0	0	0	0	0	0	0	0	0	0	2	0	0	0	0	0	0	0	0	1	0	0	0	0	0	0	0	0	0	0	0	3	0	0	0	0	0	0
G-2016_refine.593-0.Bac	Effluent Group	Bdellovibrionota	Oligoflexia	Oligoflexales	unclassified_Oligoflexales	unclassified_Oligoflexales	unclassified_Oligoflexales	0	1	1	0	0	1	0	0	0	0	0	0	0	0	0	0	0	0	0	0	0	0	0	1	0	0	0	0	0	0	0	0	0	0	1	1	0	0	0	0	0	0
G-2016_refine.594.Bac	Effluent Group	Bdellovibrionota	Bdellovibrionia	Bdellovibrionales	UBA1609	unclassified_UBA1609	unclassified_UBA1609	0	0	0	0	0	0	0	0	0	0	0	0	0	0	0	0	0	0	10	0	0	0	0	0	0	0	0	0	0	0	0	0	0	0	0	2	0	0	0	0	0	0
G-2016_refine.599-0.Bac	Effluent Group	Bdellovibrionota	Bdellovibrionia	Bdellovibrionales	Bdellovibrionaceae	unclassified_Bdellovibrionaceae	unclassified_Bdellovibrionaceae	0	0	0	0	0	0	0	0	0	0	0	0	0	0	0	0	0	0	0	0	0	0	0	0	0	0	0	0	0	0	0	0	0	0	0	2	1	0	0	0	0	0
G-2016_refine.602-0.Bac	Effluent Group	Patescibacteria	Microgenomatia	UBA1400	Pacebacteraceae	unclassified_Pacebacteraceae	unclassified_Pacebacteraceae	0	0	0	0	0	0	0	0	0	0	0	0	0	0	0	0	0	0	0	0	0	0	0	0	0	0	0	0	0	0	0	0	0	0	0	0	0	0	0	0	0	0
G-2016_refine.603.Bac	Effluent Group	Bdellovibrionota	Bdellovibrionia	Bdellovibrionales	Bdellovibrionaceae	unclassified_Bdellovibrionaceae	unclassified_Bdellovibrionaceae	0	0	0	0	0	0	0	0	0	0	0	0	0	0	0	0	0	0	0	0	0	0	0	0	0	0	0	0	0	0	0	0	0	0	0	15	0	0	0	0	0	0
G-2016_refine.604.Bac	Effluent Group	Bdellovibrionota	Bdellovibrionia	Bdellovibrionales	Bdellovibrionaceae	unclassified_Bdellovibrionaceae	unclassified_Bdellovibrionaceae	0	0	0	0	0	0	0	0	0	0	0	0	0	0	0	0	0	0	1	0	0	0	0	0	0	0	0	0	0	0	0	0	0	0	0	5	0	0	0	0	0	0
G-2016_refine.605.Bac	Effluent Group	Bdellovibrionota	Bdellovibrionia	Bdellovibrionales	UBA1609	unclassified_UBA1609	unclassified_UBA1609	0	0	0	0	0	0	0	0	0	0	0	0	0	0	0	0	0	0	2	0	0	0	0	0	0	0	0	0	0	0	0	0	0	0	0	6	0	2	0	0	0	0
G-2016_refine.606.Bac	Effluent Group	UBP17	UBA6191	UBA6191	UBA6191	UBA6191	unclassified_UBA6191	0	1	0	0	0	0	0	0	0	0	0	0	0	0	0	0	0	0	0	0	0	0	0	0	0	0	0	0	0	0	0	0	0	0	0	1	0	0	0	0	0	0
G-2016_refine.607.Bac	Effluent Group	Bdellovibrionota	Bdellovibrionia	Bdellovibrionales	Bdellovibrionaceae	unclassified_Bdellovibrionaceae	unclassified_Bdellovibrionaceae	0	0	0	0	0	0	0	0	0	0	0	0	0	0	0	0	0	0	0	0	0	0	0	0	0	0	0	0	0	0	0	0	0	0	0	2	0	0	0	0	0	0
IW-2016_refine.383-0.Bac	Effluent Group	Proteobacteria	Alphaproteobacteria	Rickettsiales	Rickettsiaceae	GCA-2402195	unclassified_GCA-2402195	0	0	0	0	0	0	0	0	0	0	0	0	0	0	0	0	0	0	0	0	0	0	0	0	0	0	0	0	0	0	0	0	0	0	0	0	0	0	0	0	0	0
IW-2016_refine.540.Bac	Effluent Group	Proteobacteria	Gammaproteobacteria	Betaproteobacteriales	Methylophilaceae	Methylophilus	unclassified_Methylophilus	0	0	0	0	0	0	0	0	0	0	0	0	0	0	0	0	0	0	0	0	0	0	0	1	0	0	0	0	0	0	0	0	0	0	0	3	0	5	0	0	0	0
IW-2017_refine.328.Bac	Effluent Group	Actinobacteriota	Actinobacteria	Corynebacteriales	Corynebacteriaceae	Mycobacterium	unclassified_Mycobacterium	0	0	0	0	0	0	0	0	0	0	0	0	0	0	0	0	0	0	0	0	0	0	0	1	0	0	0	0	0	0	0	0	0	0	0	1	0	0	0	0	0	0
IW-2017_refine.335-0.Bac	Effluent Group	Bacteroidota	Bacteroidia	Chitinophagales	Chitinophagaceae	unclassified_Chitinophagaceae	unclassified_Chitinophagaceae	0	0	0	0	0	0	0	0	0	0	0	0	0	0	0	0	0	0	0	0	0	0	0	0	0	0	0	0	0	1	0	0	0	0	0	1	1	0	0	0	0	0
IW-2017_refine.390-0.Bac	Effluent Group	Actinobacteriota	Actinobacteria	Nanopelagicales	S36-B12	UBA10649	unclassified_UBA10649	0	0	0	0	0	0	0	0	0	0	0	0	0	0	0	0	0	0	0	0	0	0	0	0	0	0	0	0	0	0	0	0	0	0	0	2	0	0	0	0	0	0
IW-2017_refine.459.Bac	Effluent Group	Bacteroidota	Bacteroidia	Chitinophagales	Chitinophagaceae	Sediminibacterium	unclassified_Sediminibacterium	0	0	0	0	0	0	0	0	0	0	0	0	0	0	0	0	0	0	0	0	0	0	0	1	0	0	0	0	0	0	0	0	0	0	0	2	0	0	0	0	0	0
IW-2017_refine.460.Bac	Effluent Group	Proteobacteria	Gammaproteobacteria	Enterobacterales	Aeromonadaceae	Aeromonas	unclassified_Aeromonas	0	0	0	0	0	0	0	0	0	0	0	0	0	0	0	0	0	0	0	0	0	0	0	0	0	0	0	1	0	0	1	0	0	0	0	1	0	0	0	0	0	0
IW-2017_refine.474.Bac	Effluent Group	Proteobacteria	Gammaproteobacteria	Betaproteobacteriales	Rhodocyclaceae	Ga0074130	unclassified_Ga0074130	0	0	0	0	0	0	0	0	0	0	0	0	0	0	0	0	0	0	4	0	0	0	0	0	0	0	0	0	0	0	0	0	0	0	0	8	0	7	0	0	0	0
IW-2017_refine.490.Bac	Effluent Group	Proteobacteria	Gammaproteobacteria	Betaproteobacteriales	Methylophilaceae	Methylophilus	unclassified_Methylophilus	0	0	0	0	0	0	0	0	0	0	0	0	0	0	0	0	0	0	0	0	0	0	0	2	0	0	0	0	0	0	0	0	0	0	0	4	0	4	0	0	0	0
IW-2017_refine.497.Bac	Effluent Group	Actinobacteriota	Actinobacteria	Actinomycetales	Microbacteriaceae	Yonghaparkia	unclassified_Yonghaparkia	0	0	0	0	0	0	0	0	0	0	0	0	0	0	0	0	0	0	0	0	0	0	0	0	0	0	0	0	0	0	0	0	0	0	0	3	0	0	0	0	0	0
IW-2017_refine.513.Bac	Effluent Group	Bacteroidota	Bacteroidia	Chitinophagales	Chitinophagaceae	UBA12329	unclassified_UBA12329	0	0	0	0	0	0	0	0	0	0	0	0	0	0	0	0	0	0	15	0	0	0	0	15	0	0	0	0	0	15	0	0	0	0	0	30	3	0	0	0	0	0
IW-2017_refine.520-0.Bac	Effluent Group	Proteobacteria	Alphaproteobacteria	Rhizobiales	Xanthobacteraceae	unclassified_Xanthobacteraceae	unclassified_Xanthobacteraceae	0	0	0	0	0	0	0	0	0	0	0	0	0	0	0	0	0	0	2	0	0	0	0	0	0	0	0	0	0	0	0	0	0	0	0	3	1	1	0	0	0	0
IW-2017_refine.525.Bac	Effluent Group	Actinobacteriota	Acidimicrobiia	Microtrichales	Microtrichaceae	IMCC26207	unclassified_IMCC26207	0	0	0	0	0	0	0	0	0	0	0	0	0	0	0	0	0	0	0	0	0	0	0	0	0	0	0	0	0	0	0	0	0	0	0	2	0	0	0	0	0	0
IW-2017_refine.532.Bac	Effluent Group	Proteobacteria	Alphaproteobacteria	Rhodobacterales	Rhodobacteraceae	MZDSW-24AT	unclassified_MZDSW-24AT	0	0	0	0	0	0	0	0	0	0	0	0	0	0	0	0	0	0	0	0	0	0	0	3	0	0	0	0	0	0	0	0	0	0	0	6	1	0	0	0	0	0
IW-2017_refine.537-0.Bac	Effluent Group	Actinobacteriota	Actinobacteria	Nanopelagicales	UBA10799	UBA10799	unclassified_UBA10799	0	0	0	0	0	0	0	0	0	0	0	0	0	0	0	0	0	0	0	0	0	0	0	0	0	0	0	0	0	0	0	0	0	0	0	1	0	0	0	0	0	0
IW-2017_refine.543.Bac	Effluent Group	Patescibacteria	Paceibacteria	UBA9983	Kaiserbacteraceae	UBA10103	unclassified_UBA10103	0	0	0	0	0	0	0	0	0	0	0	0	0	0	0	0	0	0	0	0	0	0	0	0	0	0	0	0	0	0	0	0	0	0	0	0	0	0	0	0	0	0
IW-2017_refine.550.Bac	Effluent Group	Proteobacteria	Alphaproteobacteria	Rhizobiales	Hyphomicrobiaceae	Hyphomicrobium	unclassified_Hyphomicrobium	0	0	1	0	0	0	0	0	0	0	0	0	0	0	0	0	0	0	0	0	0	0	0	1	0	0	0	0	0	0	0	0	0	0	0	14	0	12	0	0	0	0
IW-2017_refine.556.Bac	Effluent Group	Proteobacteria	Alphaproteobacteria	Sphingomonadales	Sphingomonadaceae	UBA6171	unclassified_UBA6171	0	1	1	0	0	0	0	0	0	0	0	0	0	0	0	0	0	0	1	0	0	0	0	1	0	0	0	0	0	0	0	0	0	0	0	2	1	1	0	0	0	0
IW-2017_refine.557-0.Bac	Effluent Group	Proteobacteria	Alphaproteobacteria	Rhizobiales	Xanthobacteraceae	Xanthobacter	unclassified_Xanthobacter	0	0	0	0	0	0	0	0	0	0	0	0	0	0	0	0	0	0	0	0	0	0	0	2	0	0	0	0	0	0	1	0	0	0	0	2	0	3	0	0	0	0
IW-2017_refine.558-0.Bac	Effluent Group	Proteobacteria	Alphaproteobacteria	Caulobacterales	Hyphomonadaceae	Hyphomonas	unclassified_Hyphomonas	0	0	0	0	0	0	0	0	0	0	0	0	0	0	0	0	0	0	0	0	0	0	0	1	0	0	0	0	0	3	0	0	0	0	0	55	1	3	0	0	0	0
IW-2017_refine.559.Bac	Effluent Group	Patescibacteria	Gracilibacteria	1-14-2-50-48-13	1-14-2-50-48-13	1-14-2-50-48-13	unclassified_1-14-2-50-48-13	0	0	0	0	0	0	0	0	0	0	0	0	0	0	0	0	0	0	0	0	0	0	0	0	0	0	0	0	0	0	0	0	0	0	0	11	0	0	0	0	0	0
IW-2017_refine.573.Bac	Effluent Group	Bacteroidota	Bacteroidia	Flavobacteriales	Weeksellaceae	Chryseobacterium	Chryseobacterium aquaticum	0	0	0	0	0	0	0	0	0	0	0	0	0	0	0	0	0	0	1	0	0	0	0	2	0	0	0	0	0	0	0	0	0	0	0	6	7	0	0	0	0	0
IW-2017_refine.583-0.Bac	Effluent Group	Actinobacteriota	Actinobacteria	Nanopelagicales	UBA10799	unclassified_UBA10799	unclassified_UBA10799	0	0	0	0	0	0	0	0	0	0	0	0	0	0	0	0	0	0	0	0	0	0	0	0	0	0	0	0	0	0	0	0	0	0	0	2	0	0	0	0	0	0
IW-2017_refine.590-0.Bac	Effluent Group	Verrucomicrobiota	Verrucomicrobiae	Chthoniobacterales	Terrimicrobiaceae	Terrimicrobium	unclassified_Terrimicrobium	0	0	0	0	0	0	0	0	0	0	0	0	0	0	0	0	0	0	0	0	0	0	0	0	0	0	0	0	0	0	0	0	0	0	0	3	0	2	0	0	0	0
IW-2017_refine.591-0.Bac	Effluent Group	Proteobacteria	Alphaproteobacteria	Rhizobiales	Hyphomicrobiaceae	Hyphomicrobium	Hyphomicrobium zavarzinii	0	0	1	0	0	0	0	0	0	0	0	0	0	0	0	0	0	0	0	0	0	0	0	4	0	0	0	0	0	0	0	0	0	0	0	6	0	3	0	0	0	0
IW-2017_refine.609-0.Bac	Effluent Group	Patescibacteria	Gracilibacteria	Peregrinibacterales	UBA1369	unclassified_UBA1369	unclassified_UBA1369	0	0	0	0	0	0	0	0	0	0	0	0	0	0	0	0	0	0	0	0	0	0	0	0	0	0	0	0	0	0	0	0	0	0	0	0	0	0	0	0	0	0
IW-2017_refine.622-0.Bac	Effluent Group	Proteobacteria	Alphaproteobacteria	Rhizobiales	Hyphomicrobiaceae	Hyphomicrobium	unclassified_Hyphomicrobium	0	0	0	0	0	0	0	0	0	0	0	0	0	0	0	0	0	0	0	0	0	0	0	15	0	0	0	0	0	0	1	0	0	0	0	30	0	11	0	0	0	0
IW-2017_refine.656.Bac	Effluent Group	Patescibacteria	ABY1	Uhrbacterales	2-12-FULL-60-25	21-14-all-47-17	unclassified_21-14-all-47-17	0	0	0	0	0	0	0	0	0	0	0	0	0	0	0	0	0	0	0	0	0	0	0	0	0	0	0	0	0	0	0	0	0	0	0	2	0	0	0	0	0	0
IW-2017_refine.680.Bac	Effluent Group	Patescibacteria	ABY1	UBA10025	unclassified_UBA10025	unclassified_UBA10025	unclassified_UBA10025	0	0	0	0	0	0	0	0	0	0	0	0	0	0	0	0	0	0	2	0	0	0	0	0	0	0	0	0	0	0	0	0	0	0	0	0	0	0	0	0	0	0
IW-2017_refine.684-0.Bac	Effluent Group	Patescibacteria	Berkelbacteria	unclassified_Berkelbacteria	unclassified_Berkelbacteria	unclassified_Berkelbacteria	unclassified_Berkelbacteria	0	0	0	0	0	0	0	0	0	0	0	0	0	0	0	0	0	0	0	0	0	0	0	0	0	0	6	0	0	0	0	0	0	0	0	0	0	0	0	0	0	0
IW-2017_refine.685.Bac	Effluent Group	Proteobacteria	Gammaproteobacteria	Pseudomonadales	Moraxellaceae	Psychrobacter	Psychrobacter alimentarius	0	0	0	0	0	0	0	0	0	0	0	0	0	0	0	0	0	0	0	0	0	0	0	0	0	0	0	0	0	0	0	0	0	0	0	1	0	1	0	0	0	0
IW-2018_refine.419.Bac	Effluent Group	Proteobacteria	Gammaproteobacteria	Betaproteobacteriales	Burkholderiaceae	unclassified_Burkholderiaceae	unclassified_Burkholderiaceae	0	0	0	0	0	0	0	0	0	0	0	0	0	0	0	0	0	0	0	0	0	0	0	5	0	0	0	0	0	0	0	0	0	0	0	31	0	4	0	0	0	0
IW-2018_refine.429.Bac	Effluent Group	Actinobacteriota	Actinobacteria	Actinomycetales	Microbacteriaceae	Yonghaparkia	unclassified_Yonghaparkia	0	0	0	0	0	0	0	0	0	0	0	0	0	0	0	0	0	0	0	0	0	0	0	0	0	0	0	0	0	0	0	0	0	0	0	5	0	0	0	0	0	0
IW-2018_refine.433.Bac	Effluent Group	Proteobacteria	Gammaproteobacteria	Betaproteobacteriales	Burkholderiaceae	Herminiimonas	unclassified_Herminiimonas	0	0	0	0	0	0	0	0	0	0	0	0	0	0	0	0	0	0	4	0	0	0	0	0	0	0	0	0	0	0	0	0	0	0	0	17	0	26	0	0	0	0
IW-2018_refine.451.Bac	Effluent Group	Proteobacteria	Gammaproteobacteria	Betaproteobacteriales	Burkholderiaceae	UBA954	unclassified_UBA954	0	0	0	0	0	0	0	0	0	0	0	0	0	0	0	0	0	0	0	0	0	0	0	12	0	0	0	0	0	0	0	0	0	0	0	17	0	0	0	0	0	0
IW-2018_refine.452.Bac	Effluent Group	Verrucomicrobiota	Verrucomicrobiae	Opitutales	Opitutaceae	IMCC26134	unclassified_IMCC26134	0	0	0	0	0	0	0	0	0	0	0	0	0	0	0	0	0	0	0	0	0	0	0	0	0	0	0	0	0	0	0	0	0	0	0	3	0	1	0	0	0	0
IW-2018_refine.463.Bac	Effluent Group	Proteobacteria	Alphaproteobacteria	Sneathiellales	Ferrovibrionaceae	Ferrovibrio	unclassified_Ferrovibrio	0	0	0	0	0	0	0	0	0	0	0	0	0	0	0	0	0	0	1	0	0	0	0	0	0	0	0	0	0	0	0	0	0	0	0	4	0	8	0	0	0	0
IW-2018_refine.465.Bac	Effluent Group	Proteobacteria	Gammaproteobacteria	Betaproteobacteriales	Burkholderiaceae	Cupriavidus	unclassified_Cupriavidus	0	0	0	0	0	0	0	0	0	0	0	0	0	0	0	0	0	0	0	0	0	0	0	6	0	0	0	0	1	1	0	0	0	0	0	8	0	11	1	0	0	0
IW-2018_refine.467-0.Bac	Effluent Group	Proteobacteria	Alphaproteobacteria	UBA828	unclassified_UBA828	unclassified_UBA828	unclassified_UBA828	0	0	0	0	0	0	0	0	0	0	0	0	0	0	0	0	0	0	0	0	0	0	0	0	0	0	0	0	0	0	0	0	0	0	0	5	0	1	0	0	0	0
IW-2018_refine.471.Bac	Effluent Group	Proteobacteria	Alphaproteobacteria	Rhizobiales	Hyphomicrobiaceae	unclassified_Hyphomicrobiaceae	unclassified_Hyphomicrobiaceae	0	0	0	0	0	0	0	0	0	0	0	0	0	0	0	0	0	0	1	0	0	0	0	11	0	0	0	0	0	0	0	0	0	0	0	10	0	13	0	0	0	0
IW-2018_refine.485.Bac	Effluent Group	Proteobacteria	Gammaproteobacteria	Betaproteobacteriales	Burkholderiaceae	Pandoraea	Pandoraea pnomenusa_B	0	0	0	0	0	0	0	0	0	0	0	0	0	0	0	0	0	0	0	0	0	0	0	1	0	0	0	0	3	0	0	0	0	1	0	3	0	4	1	0	0	0
IW-2018_refine.489.Bac	Effluent Group	Proteobacteria	Gammaproteobacteria	Methylococcales	Methylococcaceae	Methylococcus	unclassified_Methylococcus	0	0	0	0	0	0	0	0	0	0	0	0	0	0	0	0	0	0	0	0	0	0	0	1	0	0	0	0	0	0	0	0	0	0	0	1	0	2	0	0	0	0
IW-2018_refine.492.Bac	Effluent Group	Proteobacteria	Alphaproteobacteria	Caulobacterales	Hyphomonadaceae	Hyphomonas	unclassified_Hyphomonas	0	0	0	0	0	0	0	0	0	0	0	0	0	0	0	0	0	0	0	0	0	0	0	5	0	0	0	0	0	0	0	0	0	0	0	2	1	2	0	0	0	0
IW-2018_refine.493-0.Bac	Effluent Group	Patescibacteria	Paceibacteria	UBA9983	Kaiserbacteraceae	GWA1-54-10	unclassified_GWA1-54-10	0	0	0	0	0	0	0	0	0	0	0	0	0	0	0	0	0	0	0	0	0	0	0	0	0	0	0	0	0	0	0	0	0	0	0	2	0	0	0	0	0	0
IW-2018_refine.496-0.Bac	Effluent Group	Patescibacteria	Paceibacteria	UBA9983	Zambryskibacteraceae	unclassified_Zambryskibacteraceae	unclassified_Zambryskibacteraceae	0	0	0	0	0	0	0	0	0	0	0	0	0	0	0	0	0	0	0	0	0	0	0	0	0	0	0	0	0	0	0	0	0	0	0	0	0	0	0	0	0	0
IW-2018_refine.497.Bac	Effluent Group	Proteobacteria	Gammaproteobacteria	Betaproteobacteriales	Burkholderiaceae	Limnobacter	unclassified_Limnobacter	0	0	0	0	0	0	0	0	0	0	0	0	0	0	0	0	0	0	0	0	0	0	0	35	0	0	0	0	0	0	0	0	0	0	0	56	0	16	0	0	0	0
IW-2018_refine.501.Bac	Effluent Group	Bacteroidota	Bacteroidia	Chitinophagales	Chitinophagaceae	UBA12329	unclassified_UBA12329	0	0	0	0	0	0	0	0	0	0	0	0	0	0	0	0	0	0	1	0	0	0	0	1	0	0	0	0	0	1	0	0	0	0	0	1	1	0	0	0	0	0
IW-2018_refine.508.Bac	Effluent Group	Planctomycetota	Phycisphaerae	UBA1845	unclassified_UBA1845	unclassified_UBA1845	unclassified_UBA1845	0	0	0	0	0	0	0	0	0	0	0	0	0	0	0	0	0	0	0	0	0	0	0	0	0	0	0	0	0	0	0	0	0	0	0	2	1	10	0	0	0	0
IW-2018_refine.513.Bac	Effluent Group	Patescibacteria	Saccharimonadia	Saccharimonadales	Saccharimonadaceae	UBA1547	unclassified_UBA1547	0	0	0	0	0	0	0	0	0	0	0	0	0	0	0	0	0	0	0	0	0	0	0	0	0	0	0	0	0	0	0	0	0	0	0	20	0	0	0	0	0	0
IW-2018_refine.518.Bac	Effluent Group	Patescibacteria	Paceibacteria	UBA9983	Nomurabacteraceae	2-01-FULL-33-17	unclassified_2-01-FULL-33-17	0	0	0	0	0	0	0	0	0	0	0	0	0	0	0	0	0	0	0	0	0	0	0	0	0	0	0	0	0	0	0	0	0	0	0	0	0	0	0	0	0	0
IW-2018_refine.527-0.Bac	Effluent Group	Patescibacteria	Doudnabacteria	UBA920	UBA920	unclassified_UBA920	unclassified_UBA920	0	0	0	0	0	0	0	0	0	0	0	0	0	0	0	0	0	0	0	0	0	0	0	0	0	0	0	0	0	0	0	0	0	0	0	3	0	0	0	0	0	0
IW-2018_refine.534.Bac	Effluent Group	Bacteroidota	Bacteroidia	UBA7662	UBA7662	UBA7662	unclassified_UBA7662	0	0	0	0	0	0	0	0	0	0	0	0	0	0	0	0	0	0	0	0	0	0	0	1	0	0	0	0	0	0	0	0	0	0	0	18	0	5	0	0	0	0
IW-2018_refine.536.Bac	Effluent Group	Patescibacteria	Microgenomatia	UBA1400	UBA12028	unclassified_UBA12028	unclassified_UBA12028	0	0	0	0	0	0	0	0	0	0	0	0	0	0	0	0	0	0	0	0	0	0	0	0	0	0	0	0	0	0	0	0	0	0	0	0	0	0	0	0	0	0
IW-2018_refine.537-0.Bac	Effluent Group	Patescibacteria	Microgenomatia	Daviesbacterales	UBA10151	unclassified_UBA10151	unclassified_UBA10151	0	0	0	0	0	0	0	0	0	0	0	0	0	0	0	0	0	0	1	0	0	0	0	0	0	0	0	0	0	0	0	0	0	0	0	1	0	0	0	0	0	0
IW-2018_refine.548.Bac	Effluent Group	Omnitrophota	koll11	UBA10015	unclassified_UBA10015	unclassified_UBA10015	unclassified_UBA10015	0	0	0	0	0	0	0	0	0	0	0	0	0	0	0	0	0	0	0	0	0	0	0	0	0	0	0	0	0	0	0	0	0	0	0	1	0	0	0	0	0	0
IW-2018_refine.549-0.Bac	Effluent Group	Patescibacteria	Dojkabacteria	B142	unclassified_B142	unclassified_B142	unclassified_B142	1	0	0	0	0	0	0	0	0	0	0	0	0	0	0	0	0	0	1	0	0	0	0	0	0	0	0	0	0	0	0	0	0	0	0	0	0	0	0	0	0	0
IW-2018_refine.550.Bac	Effluent Group	Bacteroidota	Bacteroidia	NS11-12g	UBA8524	unclassified_UBA8524	unclassified_UBA8524	0	0	0	0	0	0	0	0	0	0	0	0	0	0	0	0	0	0	0	0	0	0	0	1	0	0	0	0	0	0	0	0	0	0	0	2	0	1	0	0	0	0
IW-2018_refine.554.Bac	Effluent Group	Bdellovibrionota	Bdellovibrionia	Bdellovibrionales	UBA1609	unclassified_UBA1609	unclassified_UBA1609	0	0	0	0	0	0	0	0	0	0	0	0	0	0	0	0	0	0	1	0	0	0	0	0	0	0	0	0	0	0	0	0	0	0	0	2	0	1	0	0	0	0
IW-2018_refine.556.Bac	Effluent Group	Omnitrophota	koll11	UBA10015	kpj58rc	unclassified_kpj58rc	unclassified_kpj58rc	0	0	0	0	0	0	0	0	0	0	0	0	0	0	0	0	0	0	0	0	0	0	0	0	0	0	0	0	0	0	0	0	0	0	0	7	0	16	0	0	0	0
J-2017_refine.072-0.Bac	Effluent Group	Bacteroidota	Bacteroidia	NS11-12g	UKL13-3	UBA6183	unclassified_UBA6183	0	0	0	0	0	0	0	0	0	0	0	0	0	0	0	0	0	0	0	0	0	0	0	0	0	0	0	0	0	0	0	0	0	0	0	2	0	0	0	0	0	0
J-2017_refine.073-0.Bac	Effluent Group	Proteobacteria	Gammaproteobacteria	Betaproteobacteriales	Burkholderiaceae	Noviherbaspirillum	unclassified_Noviherbaspirillum	0	0	0	0	0	0	0	0	0	0	0	0	0	0	0	0	0	0	0	0	0	0	0	0	0	0	0	0	0	0	0	0	0	0	0	4	0	11	0	0	0	0
J-2017_refine.126.Bac	Effluent Group	Proteobacteria	Gammaproteobacteria	Betaproteobacteriales	Burkholderiaceae	Rubrivivax	unclassified_Rubrivivax	0	0	0	0	0	0	0	0	0	0	0	0	0	0	0	0	0	0	0	0	0	0	0	3	0	0	0	0	0	0	0	0	0	0	0	10	0	10	0	0	0	0
J-2017_refine.185-0.Bac	Effluent Group	Verrucomicrobiota	Verrucomicrobiae	Opitutales	UBA953	UBA8828	unclassified_UBA8828	0	0	0	0	0	0	0	0	0	0	0	0	0	0	0	0	0	0	0	0	0	0	0	0	0	0	0	0	0	0	0	0	0	0	0	3	0	0	0	0	0	0
J-2017_refine.223-0.Bac	Effluent Group	Bacteroidota	Bacteroidia	NS11-12g	UBA955	UBA955	unclassified_UBA955	0	0	0	0	0	0	0	0	0	0	0	0	0	0	0	0	0	0	0	0	0	0	0	0	0	0	0	0	0	0	0	0	0	0	0	3	0	0	0	0	0	0
J-2017_refine.273.Bac	Effluent Group	Actinobacteriota	Acidimicrobiia	Microtrichales	Ilumatobacteraceae	UBA8979	unclassified_UBA8979	0	1	0	0	0	0	0	0	0	0	0	0	0	0	0	0	0	0	0	0	0	0	0	0	0	0	0	0	0	0	0	0	0	0	0	2	0	0	0	0	0	0
J-2017_refine.276.Bac	Effluent Group	Actinobacteriota	Acidimicrobiia	Microtrichales	UBA8139	UBA8139	unclassified_UBA8139	0	0	0	0	0	0	0	0	0	0	0	0	0	0	0	0	0	0	0	0	0	0	0	2	0	0	0	0	0	0	0	0	0	0	0	1	0	0	0	0	0	0
J-2017_refine.296.Bac	Effluent Group	Proteobacteria	Alphaproteobacteria	Acetobacterales	Acetobacteraceae	70-18	unclassified_70-18	0	0	0	0	0	0	0	0	0	0	0	0	0	0	0	0	0	0	4	0	0	0	0	9	0	0	0	0	0	0	0	0	0	0	0	15	0	12	0	0	0	0
J-2017_refine.303-0.Bac	Effluent Group	Bacteroidota	Kapabacteria	Kapabacteriales	GCA-002839825	unclassified_GCA-002839825	unclassified_GCA-002839825	0	0	0	0	0	0	0	0	0	0	0	0	0	0	0	0	0	0	0	0	0	0	0	0	0	0	0	0	0	0	0	0	0	0	0	1	0	1	0	0	0	0
J-2017_refine.323.Bac	Effluent Group	Bacteroidota	Bacteroidia	Chitinophagales	Chitinophagaceae	UBA1935	unclassified_UBA1935	0	0	0	0	0	0	0	0	0	0	0	0	0	0	0	0	0	0	0	0	0	0	0	0	0	0	0	0	0	1	0	0	0	0	0	3	0	1	0	0	0	0
J-2017_refine.327.Bac	Effluent Group	Bacteroidota	Kapabacteria	Kapabacteriales	UBA961	UBA961	unclassified_UBA961	0	0	0	0	0	0	0	0	0	0	0	0	0	0	0	0	0	0	0	0	0	0	0	0	0	0	0	0	0	0	0	0	0	0	0	8	0	0	0	0	0	0
J-2017_refine.335-0.Bac	Effluent Group	Actinobacteriota	Actinobacteria	Nanopelagicales	S36-B12	GCA-2737125	unclassified_GCA-2737125	0	0	0	0	0	0	0	0	0	0	0	0	0	0	0	0	0	0	0	0	0	0	0	0	0	0	0	0	0	0	0	0	0	0	0	1	0	0	0	0	0	0
J-2017_refine.338.Bac	Effluent Group	Bacteroidota	Bacteroidia	Chitinophagales	Chitinophagaceae	OLB11	unclassified_OLB11	0	0	0	0	0	0	0	0	0	0	0	0	0	0	0	0	0	0	1	0	0	0	0	0	0	0	0	0	0	0	0	0	0	0	0	2	0	0	0	0	0	0
J-2017_refine.339-0.Bac	Effluent Group	Proteobacteria	Alphaproteobacteria	Caulobacterales	Caulobacteraceae	Phenylobacterium	unclassified_Phenylobacterium	0	0	0	0	0	0	0	0	0	0	0	0	0	0	0	0	0	0	1	0	0	0	0	2	0	0	0	0	0	0	0	0	0	0	0	4	2	0	0	0	0	0
J-2017_refine.343.Bac	Effluent Group	Proteobacteria	Alphaproteobacteria	Caulobacterales	Hyphomonadaceae	Aquidulcibacter	unclassified_Aquidulcibacter	0	0	0	0	0	0	0	0	0	0	0	0	0	0	0	0	0	0	1	0	0	0	0	0	0	0	0	0	0	0	0	0	0	0	0	2	0	0	0	0	0	0
J-2017_refine.357-0.Bac	Effluent Group	Gemmatimonadota	Gemmatimonadetes	Gemmatimonadales	Gemmatimonadaceae	Gemmatimonas	unclassified_Gemmatimonas	0	0	0	0	0	0	0	0	0	0	0	0	0	0	0	0	0	0	2	0	0	0	0	2	0	0	0	0	0	0	0	0	0	0	0	5	0	1	0	0	0	0
J-2017_refine.358.Bac	Effluent Group	Proteobacteria	Alphaproteobacteria	Caulobacterales	Hyphomonadaceae	Aquidulcibacter	unclassified_Aquidulcibacter	0	0	0	0	0	0	0	0	0	0	0	0	0	0	0	0	0	0	1	0	0	0	0	1	0	0	0	0	0	0	0	0	0	0	0	2	1	0	0	0	0	0
J-2017_refine.361.Bac	Effluent Group	Proteobacteria	Alphaproteobacteria	Caulobacterales	Caulobacteraceae	Phenylobacterium	unclassified_Phenylobacterium	0	0	0	0	0	0	0	0	0	0	0	0	0	0	0	0	0	0	4	0	0	0	0	0	0	0	0	0	0	0	0	0	0	0	0	5	1	0	0	0	0	0
J-2017_refine.365.Bac	Effluent Group	Proteobacteria	Gammaproteobacteria	Betaproteobacteriales	Gallionellaceae	UBA7399	unclassified_UBA7399	0	0	0	0	0	0	0	0	0	0	0	0	0	0	0	0	0	0	0	0	0	0	0	0	0	0	0	0	0	0	0	0	0	0	0	2	0	1	0	0	0	0
J-2017_refine.373-0.Bac	Effluent Group	Actinobacteriota	Acidimicrobiia	Microtrichales	UBA8139	UBA8139	unclassified_UBA8139	0	0	0	0	0	0	0	0	0	0	0	0	0	0	0	0	0	0	0	0	0	0	0	2	0	0	0	0	0	0	0	0	0	0	0	2	0	0	0	0	0	0
J-2017_refine.376-0.Bac	Effluent Group	Bacteroidota	Bacteroidia	NS11-12g	UBA955	unclassified_UBA955	unclassified_UBA955	0	0	0	0	0	0	0	0	0	0	0	0	0	0	0	0	0	0	0	0	0	0	0	0	0	0	0	0	0	0	0	0	0	0	0	2	0	0	0	0	0	0
J-2017_refine.384-0.Bac	Effluent Group	Bacteroidota	Kapabacteria	Kapabacteriales	Kapabacteriaceae	UBA10438	unclassified_UBA10438	0	0	0	0	0	0	0	0	0	0	0	0	0	0	0	0	0	0	0	0	0	0	0	0	0	0	0	0	0	0	0	0	0	0	0	7	0	1	0	0	0	0
J-2017_refine.388.Bac	Effluent Group	Bacteroidota	Bacteroidia	Chitinophagales	Saprospiraceae	UBA10441	unclassified_UBA10441	0	0	0	0	0	0	0	0	0	0	0	0	0	0	0	0	0	0	1	0	0	0	0	1	0	0	0	0	0	0	1	0	0	0	0	3	1	0	0	0	0	0
J-2017_refine.395-0.Bac	Effluent Group	Verrucomicrobiota	Verrucomicrobiae	Chthoniobacterales	Terrimicrobiaceae	UBA967	unclassified_UBA967	0	0	0	0	0	0	0	0	0	0	0	0	0	0	0	0	0	0	0	0	0	0	0	0	0	0	0	0	0	0	0	0	0	0	0	3	0	0	0	0	0	0
J-2018_refine.293-0.Bac	Effluent Group	Actinobacteriota	Actinobacteria	Nanopelagicales	S36-B12	GCA-2737125	unclassified_GCA-2737125	0	0	0	0	0	0	0	0	0	0	0	0	0	0	0	0	0	0	0	0	0	0	0	0	0	0	0	0	0	0	0	0	0	0	0	1	0	0	0	0	0	0
J-2018_refine.297-0.Bac	Effluent Group	Proteobacteria	Gammaproteobacteria	Betaproteobacteriales	Burkholderiaceae	Hydrogenophaga	unclassified_Hydrogenophaga	0	0	0	0	0	0	0	0	0	0	0	0	0	0	0	0	0	0	0	0	0	0	0	2	0	0	0	0	0	0	0	0	0	0	0	6	0	8	0	0	0	0
J-2018_refine.309.Bac	Effluent Group	Planctomycetota	Planctomycetes	Pirellulales	UBA1268	UBA10506	unclassified_UBA10506	0	0	0	0	0	0	0	0	0	0	0	0	0	0	0	0	0	0	1	0	0	0	0	1	0	0	0	0	0	0	0	0	0	0	0	3	0	0	0	0	0	0
J-2018_refine.313-0.Bac	Effluent Group	Bacteroidota	Bacteroidia	Chitinophagales	Chitinophagaceae	unclassified_Chitinophagaceae	unclassified_Chitinophagaceae	0	0	0	0	0	0	0	0	0	0	0	0	0	0	0	0	0	0	1	0	0	0	0	0	0	0	0	0	0	0	1	0	0	0	0	4	1	0	0	0	0	0
J-2018_refine.330-0.Bac	Effluent Group	Actinobacteriota	Thermoleophilia	Solirubrobacterales	Solirubrobacteraceae	unclassified_Solirubrobacteraceae	unclassified_Solirubrobacteraceae	0	0	0	0	0	0	0	0	0	0	0	0	0	0	0	0	0	0	0	0	0	0	0	0	0	0	0	0	0	0	0	0	0	0	0	1	0	0	0	0	0	0
J-2018_refine.342-0.Bac	Effluent Group	Patescibacteria	Paceibacteria	UBA9983	Taylorbacteraceae	unclassified_Taylorbacteraceae	unclassified_Taylorbacteraceae	0	0	0	0	0	0	0	0	0	0	0	0	0	0	0	0	0	0	1	0	0	0	0	0	0	0	0	0	0	0	0	0	0	0	0	0	0	0	0	0	0	0
J-2018_refine.346.Bac	Effluent Group	Actinobacteriota	Actinobacteria	Nanopelagicales	Nanopelagicaceae	unclassified_Nanopelagicaceae	unclassified_Nanopelagicaceae	0	0	0	0	0	0	0	0	0	0	0	0	0	0	0	0	0	0	0	0	0	0	0	0	0	0	0	0	0	0	0	0	0	0	0	2	0	0	0	0	0	0
J-2018_refine.354.Bac	Effluent Group	Bacteroidota	Kapabacteria	Kapabacteriales	Kapabacteriaceae	UBA10438	unclassified_UBA10438	0	0	0	0	0	0	0	0	0	0	0	0	0	0	0	0	0	0	1	0	0	0	0	0	0	0	0	0	0	0	0	0	0	0	0	6	0	0	0	0	0	0
J-2018_refine.369-0.Bac	Effluent Group	Dependentiae	Babeliae	Babeliales	Babeliaceae	unclassified_Babeliaceae	unclassified_Babeliaceae	0	0	0	0	0	0	0	0	0	0	0	0	0	0	0	0	0	0	0	0	0	0	0	0	0	0	0	0	0	0	0	0	0	0	0	0	0	0	0	0	0	0
J-2018_refine.373-0.Bac	Effluent Group	Deinococcota	Deinococci	Deinococcales	Thermaceae	unclassified_Thermaceae	unclassified_Thermaceae	0	0	0	0	0	0	0	0	0	0	0	0	0	0	0	0	0	0	1	0	0	0	0	1	0	0	0	0	0	0	0	0	0	0	0	2	1	0	0	0	0	0
J-2018_refine.382.Bac	Effluent Group	Bacteroidota	Bacteroidia	Chitinophagales	Saprospiraceae	Haliscomenobacter	unclassified_Haliscomenobacter	0	0	0	0	0	0	0	0	0	0	0	0	0	0	0	0	0	0	1	0	0	0	0	1	0	0	0	0	0	0	0	0	0	0	0	4	1	0	0	0	0	0
J-2018_refine.387-0.Bac	Effluent Group	Actinobacteriota	Acidimicrobiia	Microtrichales	Ilumatobacteraceae	unclassified_Ilumatobacteraceae	unclassified_Ilumatobacteraceae	0	0	0	0	0	0	0	0	0	0	0	0	0	0	0	0	0	0	0	0	0	0	0	1	0	0	0	0	0	0	0	0	0	0	0	5	0	0	0	0	0	0
J-2018_refine.403.Bac	Effluent Group	Patescibacteria	Saccharimonadia	Saccharimonadales	Saccharimonadaceae	UBA1547	unclassified_UBA1547	0	0	0	0	0	0	0	0	0	0	0	0	0	0	0	0	0	0	0	0	0	0	0	0	0	0	0	0	0	0	0	0	0	0	0	0	0	0	0	0	0	0
J-2018_refine.406-0.Bac	Effluent Group	Gemmatimonadota	Gemmatimonadetes	Gemmatimonadales	Gemmatimonadaceae	Gemmatimonas	unclassified_Gemmatimonas	0	0	0	0	0	0	0	0	0	0	0	0	0	0	0	0	0	0	1	0	0	0	0	4	0	0	0	0	0	0	0	0	0	0	0	6	0	1	0	0	0	0
J-2018_refine.409.Bac	Effluent Group	Proteobacteria	Alphaproteobacteria	Caulobacterales	Caulobacteraceae	Phenylobacterium	unclassified_Phenylobacterium	0	0	0	0	0	0	0	0	0	0	0	0	0	0	0	0	0	0	1	0	0	0	0	1	0	0	0	0	0	0	0	0	0	0	0	3	2	0	0	0	0	0
J-2018_refine.448.Bac	Effluent Group	Chloroflexota	Anaerolineae	Anaerolineales	envOPS12	OLB14	unclassified_OLB14	0	1	0	0	2	0	0	0	0	0	0	0	0	0	0	0	0	0	1	0	0	0	0	1	0	0	0	0	0	0	0	0	0	0	0	1	0	0	0	0	0	0
J-2018_refine.457-0.Bac	Effluent Group	Actinobacteriota	Actinobacteria	Nanopelagicales	UBA10799	unclassified_UBA10799	unclassified_UBA10799	0	0	0	0	0	0	0	0	0	0	0	0	0	0	0	0	0	0	0	0	0	0	0	0	0	0	0	0	0	0	0	0	0	0	0	1	0	0	0	0	0	0
J-2018_refine.467-0.Bac	Effluent Group	Chloroflexota	Anaerolineae	Caldilineales	Caldilineaceae	unclassified_Caldilineaceae	unclassified_Caldilineaceae	1	1	0	0	0	0	0	0	0	0	0	0	0	0	0	0	0	0	0	0	0	0	0	1	0	0	0	0	0	0	0	0	0	0	0	11	0	0	0	0	0	0
J-2018_refine.469-0.Bac	Effluent Group	Verrucomicrobiota	Verrucomicrobiae	Chthoniobacterales	UBA6821	UBA6821	unclassified_UBA6821	0	0	0	0	0	0	0	0	0	0	0	0	0	0	0	0	0	0	0	0	0	0	0	0	0	0	0	0	0	0	0	0	0	0	0	4	0	0	0	0	0	0
J-2018_refine.478-0.Bac	Effluent Group	Patescibacteria	Paceibacteria	UBA9983	UBA5272	unclassified_UBA5272	unclassified_UBA5272	0	0	0	0	0	0	0	0	0	0	0	0	0	0	0	0	0	0	0	0	0	0	0	0	0	0	0	0	0	0	0	0	0	0	0	0	0	0	0	0	0	0
J-2018_refine.484.Bac	Effluent Group	Bacteroidota	Bacteroidia	Cytophagales	Spirosomaceae	Leadbetterella	unclassified_Leadbetterella	0	0	0	0	0	0	0	0	0	0	0	0	0	0	0	0	0	0	1	0	0	0	0	1	0	0	0	0	0	0	0	0	0	0	0	6	1	0	0	0	0	0
J-2018_refine.487.Bac	Effluent Group	Planctomycetota	Phycisphaerae	Phycisphaerales	SM1A02	UBA2402	unclassified_UBA2402	0	0	0	0	0	0	0	0	0	0	0	0	0	0	0	0	0	0	0	0	0	0	0	0	0	0	0	0	0	0	0	0	0	0	0	0	1	0	0	0	0	0
J-2018_refine.488.Bac	Effluent Group	Bacteroidota	Bacteroidia	Cytophagales	Spirosomaceae	Runella	unclassified_Runella	0	0	0	0	0	0	0	0	0	0	0	0	0	0	0	0	0	0	7	0	0	0	0	2	0	0	0	0	0	0	0	0	0	0	0	4	1	1	0	0	0	0
J-2018_refine.489.Bac	Effluent Group	Proteobacteria	Alphaproteobacteria	Micavibrionales	Micavibrionaceae	UBA6145	unclassified_UBA6145	0	0	0	0	0	0	0	0	0	0	0	0	0	0	0	0	0	0	0	0	0	0	0	0	0	0	0	0	0	0	0	0	0	0	0	0	0	1	0	0	0	0
J-2018_refine.494.Bac	Effluent Group	Bacteroidota	Bacteroidia	Cytophagales	Spirosomaceae	unclassified_Spirosomaceae	unclassified_Spirosomaceae	0	0	0	0	0	0	0	0	0	0	0	0	0	0	0	0	0	0	7	0	0	0	0	1	0	0	0	0	0	0	0	0	0	0	0	5	3	1	0	0	0	0
J-2018_refine.496.Bac	Effluent Group	Bacteroidota	Bacteroidia	Chitinophagales	Chitinophagaceae	OLB11	unclassified_OLB11	0	0	0	0	0	0	0	0	0	0	0	0	0	0	0	0	0	0	2	0	0	0	0	0	0	0	0	0	0	0	0	0	0	0	0	2	0	0	0	0	0	0
J-2018_refine.499.Bac	Effluent Group	Proteobacteria	Alphaproteobacteria	unclassified_Alphaproteobacteria	unclassified_Alphaproteobacteria	unclassified_Alphaproteobacteria	unclassified_Alphaproteobacteria	0	0	0	0	0	0	0	0	0	0	0	0	0	0	0	0	0	0	0	0	0	0	0	0	0	0	0	0	0	0	0	0	0	0	0	2	0	1	0	0	0	0
J-2018_refine.501.Bac	Effluent Group	Proteobacteria	Gammaproteobacteria	Betaproteobacteriales	Gallionellaceae	UBA7399	unclassified_UBA7399	0	0	0	0	0	0	0	0	0	0	0	0	0	0	0	0	0	0	0	0	0	0	0	0	0	0	0	0	0	0	0	0	0	0	0	1	0	1	0	0	0	0
J-2018_refine.503.Bac	Effluent Group	Bacteroidota	Bacteroidia	Flavobacteriales	Flavobacteriaceae	Flavobacterium	unclassified_Flavobacterium	0	0	0	0	0	0	0	0	0	0	0	0	0	0	0	0	0	0	0	0	0	0	0	1	0	0	0	0	0	0	0	0	0	0	0	8	0	2	0	0	0	0
J-2018_refine.506.Bac	Effluent Group	Bdellovibrionota	UBA2361	UBA2361	unclassified_UBA2361	unclassified_UBA2361	unclassified_UBA2361	0	0	0	0	0	0	0	0	0	0	0	0	0	0	0	0	0	0	0	0	0	0	0	0	0	0	0	0	0	0	0	0	0	0	0	2	0	1	0	0	0	0
J-2018_refine.509-0.Bac	Effluent Group	Bdellovibrionota	Oligoflexia	Oligoflexales	unclassified_Oligoflexales	unclassified_Oligoflexales	unclassified_Oligoflexales	0	0	0	0	0	0	0	0	0	0	0	0	0	0	0	0	0	0	0	0	0	0	0	1	0	0	0	0	0	0	0	0	0	0	0	1	0	0	0	0	0	0
J-2018_refine.511.Bac	Effluent Group	Proteobacteria	Alphaproteobacteria	Micavibrionales	Micavibrionaceae	UBA6145	unclassified_UBA6145	0	1	0	0	0	0	0	0	0	0	0	0	0	0	0	0	0	0	0	0	0	0	0	0	0	0	0	0	0	0	0	0	0	0	0	2	0	1	0	0	0	0
J-2018_refine.519.Bac	Effluent Group	Bdellovibrionota	Bacteriovoracia	UBA1018	UBA1018	unclassified_UBA1018	unclassified_UBA1018	0	0	0	0	0	0	0	0	0	0	0	0	0	0	0	0	0	0	1	0	0	0	0	0	0	0	0	0	0	0	0	0	0	0	0	1	0	1	0	0	0	0
J-2018_refine.523.Bac	Effluent Group	Bacteroidota	Bacteroidia	Chitinophagales	Saprospiraceae	UBA10441	unclassified_UBA10441	0	0	0	0	0	0	0	0	0	0	0	0	0	0	0	0	0	0	0	0	0	0	0	1	0	0	0	0	0	0	0	0	0	0	0	4	3	3	0	0	0	0
JH-2018_refine.388.Bac	Effluent Group	Proteobacteria	Gammaproteobacteria	Betaproteobacteriales	UBA11063	UBA11063	unclassified_UBA11063	0	0	0	0	0	0	0	0	0	0	0	0	0	0	0	0	0	0	1	0	0	0	0	0	0	0	0	0	0	0	0	0	0	0	0	0	0	0	0	0	0	0
JH-2018_refine.390.Bac	Effluent Group	Campylobacterota	Campylobacteria	Campylobacterales	Arcobacteraceae	Arcobacter	unclassified_Arcobacter	0	0	0	0	0	0	0	0	0	0	0	0	0	0	0	0	0	0	0	0	0	0	0	1	0	0	0	0	0	0	0	0	0	0	0	1	0	2	0	0	0	0
JH-2018_refine.395.Bac	Effluent Group	Actinobacteriota	Actinobacteria	Nanopelagicales	UBA10799	UBA10799	unclassified_UBA10799	0	0	0	0	0	0	0	0	0	0	0	0	0	0	0	0	0	0	0	0	0	0	0	0	0	0	0	0	0	0	0	0	0	0	0	2	0	0	0	0	0	0
JH-2018_refine.396.Bac	Effluent Group	Patescibacteria	ABY1	Uhrbacterales	2-12-FULL-60-25	21-14-all-47-17	unclassified_21-14-all-47-17	0	0	0	0	0	0	0	0	0	0	0	0	0	0	0	0	0	0	0	0	0	0	0	0	0	0	0	0	0	0	0	0	0	0	1	2	0	0	0	0	0	0
JH-2018_refine.401-0.Bac	Effluent Group	Patescibacteria	Saccharimonadia	Saccharimonadales	2-12-FULL-41-12	unclassified_2-12-FULL-41-12	unclassified_2-12-FULL-41-12	0	0	0	0	0	0	0	0	0	0	0	0	0	0	0	0	0	0	0	0	0	0	0	0	0	0	0	0	0	0	0	0	0	0	0	4	0	0	0	0	0	0
JH-2018_refine.402-0.Bac	Effluent Group	Proteobacteria	Gammaproteobacteria	Betaproteobacteriales	Burkholderiaceae	Rhodoferax	unclassified_Rhodoferax	0	0	0	0	0	0	0	0	0	0	0	0	0	0	0	0	0	0	0	0	0	0	0	0	0	0	0	0	0	0	0	0	0	0	0	6	0	0	0	0	0	0
JH-2018_refine.407.Bac	Effluent Group	Patescibacteria	Gracilibacteria	Peribacterales	Peribacteraceae	unclassified_Peribacteraceae	unclassified_Peribacteraceae	0	0	0	0	0	0	0	0	0	0	0	0	0	0	0	0	0	0	0	0	0	0	0	0	0	0	0	0	0	0	0	0	0	0	0	0	0	0	0	0	0	0
JH-2018_refine.411.Bac	Effluent Group	Proteobacteria	Gammaproteobacteria	Betaproteobacteriales	Burkholderiaceae	Aquabacterium	unclassified_Aquabacterium	0	0	0	0	0	0	0	0	0	0	0	0	0	0	0	0	0	0	0	0	0	0	0	0	0	0	0	0	0	0	0	0	0	0	0	23	12	4	4	0	0	0
JH-2018_refine.417-0.Bac	Effluent Group	Patescibacteria	Paceibacteria	UBA9983	Taylorbacteraceae	C7867-002	unclassified_C7867-002	0	0	0	0	0	0	0	0	0	0	0	0	0	0	0	0	0	0	0	0	0	0	0	0	0	0	0	0	0	0	0	0	0	0	0	6	0	0	0	0	0	0
JH-2018_refine.418-0.Bac	Effluent Group	Campylobacterota	Campylobacteria	Campylobacterales	Sulfurospirillaceae	Sulfurospirillum	GCF_001548035.1	0	0	0	0	0	0	0	0	0	0	0	0	0	0	0	0	0	0	0	0	0	0	0	0	0	0	0	0	0	0	2	0	0	0	0	0	0	2	0	0	0	0
JH-2018_refine.426-0.Bac	Effluent Group	Bdellovibrionota	Bdellovibrionia	Bdellovibrionales	Bdellovibrionaceae	unclassified_Bdellovibrionaceae	unclassified_Bdellovibrionaceae	0	0	0	0	0	0	0	0	0	0	0	0	0	0	0	0	0	0	0	0	0	0	0	0	0	0	0	0	0	0	0	0	0	0	0	1	0	0	0	0	0	0
JH-2018_refine.437-0.Bac	Effluent Group	Bdellovibrionota	Bdellovibrionia	Bdellovibrionales	Bdellovibrionaceae	unclassified_Bdellovibrionaceae	unclassified_Bdellovibrionaceae	0	0	0	0	0	0	0	0	0	0	0	0	0	0	0	0	0	0	0	0	0	0	0	0	0	0	0	0	0	0	0	0	0	0	0	0	0	0	0	0	0	0
JH-2018_refine.438-0.Bac	Effluent Group	Proteobacteria	Gammaproteobacteria	Berkiellales	UBA6186	UBA6186	unclassified_UBA6186	0	0	0	0	0	0	0	0	0	0	0	0	0	0	0	0	0	0	0	0	0	0	0	0	0	0	0	0	0	0	3	0	0	0	0	3	0	4	0	0	0	0
JH-2018_refine.451-0.Bac	Effluent Group	Bdellovibrionota	Bdellovibrionia	Bdellovibrionales	Bdellovibrionaceae	unclassified_Bdellovibrionaceae	unclassified_Bdellovibrionaceae	0	0	0	0	0	0	0	0	0	0	0	0	0	0	0	0	0	0	0	0	0	0	0	0	0	0	0	0	0	0	0	0	0	0	0	1	0	0	0	0	0	0
JH-2018_refine.455-0.Bac	Effluent Group	Bdellovibrionota	Bacteriovoracia	UBA1018	UBA1018	unclassified_UBA1018	unclassified_UBA1018	0	0	0	0	0	0	0	0	0	0	0	0	0	0	0	0	0	0	0	0	0	0	0	0	0	0	0	0	0	0	0	0	0	0	0	4	0	2	0	0	0	0
JH-2018_refine.470-0.Bac	Effluent Group	Patescibacteria	Gracilibacteria	Peribacterales	Peribacteraceae	unclassified_Peribacteraceae	unclassified_Peribacteraceae	0	0	0	0	0	0	0	0	0	0	0	0	0	0	0	0	0	0	0	0	0	0	0	0	0	0	0	0	0	0	0	0	0	0	0	0	0	0	0	0	0	0
JH-2018_refine.488.Bac	Effluent Group	Bdellovibrionota	Bdellovibrionia	Bdellovibrionales	Bdellovibrionaceae	Ga0074137	unclassified_Ga0074137	0	0	0	0	0	0	0	0	0	0	0	0	0	0	0	0	0	0	0	0	0	0	0	0	0	0	0	0	0	0	1	0	0	0	0	1	0	0	0	0	0	0
JY-2018_refine.292.Bac	Effluent Group	Proteobacteria	Gammaproteobacteria	Betaproteobacteriales	Rhodocyclaceae	Dechloromonas	unclassified_Dechloromonas	0	0	0	0	0	0	0	0	0	0	0	0	0	0	0	0	0	0	0	0	0	0	0	9	0	0	0	0	0	0	0	0	0	0	0	5	0	0	0	0	0	0
JY-2018_refine.296-0.Bac	Effluent Group	Proteobacteria	Gammaproteobacteria	Betaproteobacteriales	Burkholderiaceae	Macromonas	unclassified_Macromonas	0	0	0	0	0	0	0	0	0	0	0	0	0	0	0	0	0	0	0	0	0	0	0	1	0	0	0	0	0	0	0	0	0	0	0	2	0	2	0	0	0	0
JY-2018_refine.341.Bac	Effluent Group	Proteobacteria	Gammaproteobacteria	Thiomicrospirales	GCA-002282575	GCA-002282575	unclassified_GCA-002282575	0	0	0	0	0	0	0	0	0	0	0	0	0	0	0	0	0	0	0	0	0	0	0	3	0	0	0	0	0	0	0	0	0	0	0	2	0	0	0	0	0	0
JY-2018_refine.353.Bac	Effluent Group	Campylobacterota	Campylobacteria	Campylobacterales	Arcobacteraceae	Arcobacter	Arcobacter cryaerophilus	0	0	0	0	0	0	0	0	0	0	0	0	0	0	0	0	0	0	0	0	0	0	0	1	0	0	0	0	0	0	0	0	0	0	0	2	0	2	0	0	0	0
JY-2018_refine.354.Bac	Effluent Group	Proteobacteria	Gammaproteobacteria	Diplorickettsiales	Diplorickettsiaceae	Rickettsiella	Rickettsiella isopodorum	0	0	0	0	0	0	0	0	0	0	0	0	0	0	0	0	0	0	0	0	0	0	0	0	0	0	0	0	0	0	0	0	0	0	0	4	0	0	0	0	0	0
JY-2018_refine.355.Bac	Effluent Group	Proteobacteria	Alphaproteobacteria	Rhodobacterales	Rhodobacteraceae	Rhodobacter	unclassified_Rhodobacter	0	0	0	0	0	0	0	0	0	0	0	0	0	0	0	0	0	0	0	0	0	0	0	2	0	0	0	0	0	0	0	0	0	0	0	5	2	0	0	0	0	0
JY-2018_refine.357-0.Bac	Effluent Group	Proteobacteria	Gammaproteobacteria	Pseudomonadales	Moraxellaceae	Acinetobacter	unclassified_Acinetobacter	0	0	0	0	0	0	0	0	0	0	0	0	0	0	0	0	0	0	0	0	0	0	0	0	0	0	0	0	0	0	0	0	0	0	0	1	0	1	1	1	0	0
JY-2018_refine.359.Bac	Effluent Group	Proteobacteria	Gammaproteobacteria	Betaproteobacteriales	Burkholderiaceae	unclassified_Burkholderiaceae	unclassified_Burkholderiaceae	0	0	0	0	0	0	0	0	0	0	0	0	0	0	0	0	0	0	0	0	0	0	0	11	0	0	0	0	0	0	0	0	0	0	0	19	0	1	0	0	0	0
JY-2018_refine.360-0.Bac	Effluent Group	Actinobacteriota	Actinobacteria	Corynebacteriales	Corynebacteriaceae	Corynebacterium	unclassified_Corynebacterium	0	0	0	0	0	0	0	0	0	0	0	0	0	0	0	0	0	0	0	0	0	0	0	0	0	0	0	0	0	0	0	0	0	0	0	2	0	0	0	0	0	0
JY-2018_refine.401-0.Bac	Effluent Group	Campylobacterota	Campylobacteria	Campylobacterales	Thiovulaceae	Sulfuricurvum	unclassified_Sulfuricurvum	0	0	0	0	0	0	0	0	0	0	0	0	0	0	0	0	0	0	0	0	0	0	0	1	0	0	0	0	0	0	0	0	0	0	0	1	0	1	0	0	0	0
JY-2018_refine.404.Bac	Effluent Group	Bacteroidota	Bacteroidia	Bacteroidales	Dysgonomonadaceae	UBA4179	GCA_002347785.1	0	0	0	0	0	0	0	0	0	0	0	0	0	0	0	0	0	0	0	0	0	0	0	0	0	0	0	0	0	0	0	0	0	0	0	1	0	0	0	0	0	0
JY-2018_refine.411.Bac	Effluent Group	Actinobacteriota	Actinobacteria	Nanopelagicales	UBA10799	UBA10799	unclassified_UBA10799	0	0	0	0	0	0	0	0	0	0	0	0	0	0	0	0	0	0	0	0	0	0	0	0	0	0	0	0	0	0	0	0	0	0	0	2	0	0	0	0	0	0
JY-2018_refine.435.Bac	Effluent Group	Omnitrophota	koll11	UBA6215	UBA6215	2-02-FULL-50-19	unclassified_2-02-FULL-50-19	0	0	0	0	0	0	0	0	0	0	0	0	0	0	0	0	0	0	1	0	0	0	0	0	0	0	0	0	0	0	0	0	0	0	0	1	0	0	0	0	0	0
JY-2018_refine.454-0.Bac	Effluent Group	Patescibacteria	ABY1	Buchananbacterales	unclassified_Buchananbacterales	unclassified_Buchananbacterales	unclassified_Buchananbacterales	0	0	0	0	0	0	0	0	0	0	0	0	0	0	0	0	0	0	0	0	0	0	0	0	0	0	0	0	0	0	0	0	0	0	0	0	0	0	0	0	0	0
JY-2018_refine.482.Bac	Effluent Group	Bacteroidota	Bacteroidia	Bacteroidales	UBA932	DMER64	GCA_001603455.1	0	0	0	0	0	0	0	0	0	0	0	0	0	0	0	0	0	0	0	0	0	0	0	0	0	0	0	0	0	0	0	0	0	0	0	1	0	0	0	0	0	0
JY-2018_refine.501-0.Bac	Effluent Group	Patescibacteria	Paceibacteria	Paceibacterales	unclassified_Paceibacterales	unclassified_Paceibacterales	unclassified_Paceibacterales	0	0	0	0	0	0	0	0	0	0	0	0	0	0	0	0	0	0	0	0	0	0	0	0	0	0	0	0	0	0	0	0	0	0	0	0	0	0	0	0	0	0
JY-2018_refine.516-0.Bac	Effluent Group	Patescibacteria	Paceibacteria	UBA9983	Nomurabacteraceae	unclassified_Nomurabacteraceae	unclassified_Nomurabacteraceae	0	0	0	0	0	0	0	0	0	0	0	0	0	0	0	0	0	0	1	0	0	0	0	0	0	0	0	0	0	0	0	0	0	0	0	1	0	0	0	0	0	0
JY-2018_refine.527-0.Bac	Effluent Group	Patescibacteria	Paceibacteria	Yanofskybacterales	GWA2-44-9	unclassified_GWA2-44-9	unclassified_GWA2-44-9	0	0	0	0	0	0	0	0	0	0	0	0	0	0	0	0	0	0	0	0	0	0	0	0	0	0	0	0	0	0	0	0	0	0	0	0	0	0	0	0	0	0
JY-2018_refine.561-0.Bac	Effluent Group	Patescibacteria	Paceibacteria	UBA6257	unclassified_UBA6257	unclassified_UBA6257	unclassified_UBA6257	0	0	0	0	0	0	0	0	0	0	0	0	0	0	0	0	0	0	0	0	0	0	0	0	0	0	0	0	0	0	0	0	0	0	0	3	0	0	0	0	0	0
JY-2018_refine.564.Bac	Effluent Group	Patescibacteria	Microgenomatia	UBA1400	Pacebacteraceae	unclassified_Pacebacteraceae	unclassified_Pacebacteraceae	0	0	0	0	0	0	0	0	0	0	0	0	0	0	0	0	0	0	0	0	0	0	0	0	0	0	0	0	0	0	0	0	0	0	0	0	0	0	0	0	0	0
JY-2018_refine.570-0.Bac	Effluent Group	Patescibacteria	Gracilibacteria	Peregrinibacterales	2-02-FULL-48-14	unclassified_2-02-FULL-48-14	unclassified_2-02-FULL-48-14	0	0	0	0	0	0	0	0	0	0	0	0	0	0	0	0	0	0	0	0	0	0	0	0	0	0	0	0	0	0	0	0	0	0	0	0	0	0	0	0	0	0
JY-2018_refine.589-0.Bac	Effluent Group	Bacteroidota	Bacteroidia	Bacteroidales	UBA932	DMER64	GCA_002409325.1	0	0	0	0	0	0	0	0	0	0	0	0	0	0	0	0	0	0	0	0	0	0	0	0	0	0	0	0	0	0	0	0	0	0	0	1	0	0	0	0	0	0
JY-2018_refine.595-0.Bac	Effluent Group	Patescibacteria	ABY1	UBA2591	UBA6264	unclassified_UBA6264	unclassified_UBA6264	0	0	0	0	0	0	0	0	0	0	0	0	0	0	0	0	0	0	0	0	0	0	0	0	0	0	0	0	0	0	0	0	0	0	0	1	0	0	0	0	0	0
JY-2018_refine.598.Bac	Effluent Group	Patescibacteria	Paceibacteria	Paceibacterales	UBA5633	UBA5633	unclassified_UBA5633	0	0	0	0	0	0	0	0	0	0	0	0	0	0	0	0	0	0	0	0	0	0	0	0	0	0	0	0	0	0	0	0	0	0	0	0	0	0	0	0	0	0
JY-2018_refine.608-0.Bac	Effluent Group	Patescibacteria	Paceibacteria	Paceibacterales	GCA-002787255	unclassified_GCA-002787255	unclassified_GCA-002787255	0	0	0	0	0	0	0	0	0	0	0	0	0	0	0	0	0	0	0	0	0	0	0	0	0	0	0	0	0	0	0	0	0	0	0	0	0	0	0	0	0	0
JY-2018_refine.615.Bac	Effluent Group	Firmicutes	Bacilli	Acholeplasmatales	Acholeplasmataceae_A	UBA6235	GCA_002441525.1	0	0	0	0	0	0	0	0	0	0	0	0	0	0	1	0	0	0	0	0	0	0	0	0	0	0	0	0	0	0	0	0	0	0	0	3	0	0	0	0	0	0
N-2016_refine.295.Bac	Effluent Group	Campylobacterota	Campylobacteria	Campylobacterales	Arcobacteraceae	Arcobacter	Arcobacter cryaerophilus	0	0	0	0	0	0	0	0	0	0	0	0	1	0	0	1	0	0	0	0	0	0	0	1	0	0	0	0	0	0	0	0	0	0	0	2	0	1	0	0	0	0
N-2016_refine.321-0.Bac	Effluent Group	Bacteroidota	Bacteroidia	NS11-12g	UKL13-3	UBA6183	unclassified_UBA6183	0	0	0	0	0	0	0	0	0	0	0	0	0	0	0	0	0	0	2	0	0	0	0	0	0	0	0	0	0	0	0	0	0	0	0	4	1	0	0	0	0	0
N-2016_refine.338.Bac	Effluent Group	Proteobacteria	Gammaproteobacteria	Betaproteobacteriales	Burkholderiaceae	unclassified_Burkholderiaceae	unclassified_Burkholderiaceae	0	0	0	0	0	0	0	0	0	0	0	0	0	0	0	0	0	0	0	0	0	0	0	30	0	0	0	0	0	0	0	0	0	0	0	50	0	7	0	0	0	0
N-2016_refine.361-0.Bac	Effluent Group	Bacteroidota	Bacteroidia	NS11-12g	UBA955	unclassified_UBA955	unclassified_UBA955	0	0	0	0	0	0	0	0	0	0	0	0	0	0	0	0	0	0	0	0	0	0	0	0	0	0	0	0	0	0	0	0	0	0	0	4	0	0	0	0	0	0
N-2016_refine.367-0.Bac	Effluent Group	Actinobacteriota	Actinobacteria	Actinomycetales	Microbacteriaceae	Agromyces	unclassified_Agromyces	0	0	0	0	0	0	0	0	0	0	0	0	0	0	0	0	0	0	0	0	0	0	0	0	0	0	0	0	0	0	0	0	0	0	0	0	0	0	0	0	0	0
N-2016_refine.378-0.Bac	Effluent Group	Bacteroidota	Bacteroidia	Sphingobacteriales	Sphingobacteriaceae	unclassified_Sphingobacteriaceae	unclassified_Sphingobacteriaceae	0	0	0	0	0	0	0	0	0	0	0	0	0	0	0	0	0	0	0	0	0	0	0	0	0	0	0	0	0	0	0	0	0	0	0	4	1	0	0	0	0	0
N-2016_refine.380-0.Bac	Effluent Group	Campylobacterota	Campylobacteria	Campylobacterales	Arcobacteraceae	Arcobacter	unclassified_Arcobacter	0	0	0	0	0	0	0	0	0	0	0	0	0	0	0	0	0	0	0	0	0	0	0	1	0	0	0	0	0	0	3	0	0	0	0	2	0	2	0	0	0	0
N-2016_refine.384.Bac	Effluent Group	Bacteroidota	Bacteroidia	Flavobacteriales	Crocinitomicaceae	Fluviicola	unclassified_Fluviicola	0	1	0	0	0	0	0	0	0	0	0	0	0	0	0	0	0	0	0	0	0	0	0	1	0	0	0	0	0	0	0	1	0	0	0	3	1	1	0	0	0	0
N-2016_refine.394-0.Bac	Effluent Group	Bacteroidota	Bacteroidia	Chitinophagales	Chitinophagaceae	Sediminibacterium	Sediminibacterium salmoneum	0	0	0	0	0	0	0	0	0	0	0	0	0	0	0	0	0	0	0	0	0	0	0	1	0	0	0	0	0	0	0	0	0	0	0	2	0	0	0	0	0	0
N-2016_refine.411.Arc	Effluent Group	Halobacterota	Methanomicrobia	Methanomicrobiales	Methanocorpusculaceae	Methanocorpusculum	GCF_002287215.1	0	0	0	0	0	0	0	0	0	0	0	0	0	0	0	0	0	0	1	0	0	0	0	0	0	0	0	0	0	0	0	0	0	0	0	1	0	0	0	0	0	0
N-2016_refine.415.Bac	Effluent Group	Proteobacteria	Gammaproteobacteria	Betaproteobacteriales	Methylophilaceae	Methylophilus	Methylophilus methylotrophus	0	0	0	0	0	0	0	0	0	0	0	0	0	0	0	0	0	0	0	0	0	0	0	1	0	0	0	0	1	0	0	0	0	0	0	9	0	2	0	0	0	0
N-2016_refine.423-0.Bac	Effluent Group	Proteobacteria	Gammaproteobacteria	Pseudomonadales	Moraxellaceae	Acinetobacter	Acinetobacter towneri	0	0	0	0	0	0	0	0	0	0	0	0	0	0	0	0	0	0	0	0	0	0	0	0	0	0	0	0	0	0	0	0	0	0	0	3	0	0	1	0	0	0
N-2016_refine.431.Bac	Effluent Group	Proteobacteria	Gammaproteobacteria	Betaproteobacteriales	Burkholderiaceae	SCN-69-89	GCA_001724315.1	0	0	0	0	0	0	0	0	0	0	0	0	0	0	0	0	0	0	0	0	0	0	0	4	0	0	0	0	0	0	0	0	0	0	0	30	0	11	0	0	0	0
N-2016_refine.436-0.Bac	Effluent Group	Proteobacteria	Gammaproteobacteria	Betaproteobacteriales	Burkholderiaceae	PBA	GCF_000272025.1	0	0	0	0	0	0	0	0	0	0	0	0	0	0	0	0	0	0	0	0	0	0	0	0	0	0	0	0	0	0	0	0	0	0	0	3	0	2	0	0	0	0
N-2016_refine.441.Bac	Effluent Group	Proteobacteria	Alphaproteobacteria	Rhizobiales	Xanthobacteraceae	Ancylobacter	unclassified_Ancylobacter	0	0	0	0	0	0	0	0	0	0	0	0	0	0	0	0	0	0	0	0	0	0	0	1	0	0	0	0	1	0	0	0	0	0	0	45	0	12	0	0	0	0
N-2016_refine.449.Bac	Effluent Group	Bacteroidota	Bacteroidia	Bacteroidales	UBA932	DMER64	GCA_001512865.1	0	0	0	0	0	0	0	0	0	0	0	0	0	0	0	0	0	0	0	0	0	0	0	1	0	0	0	0	0	0	0	0	0	0	0	1	0	0	0	0	0	0
N-2016_refine.454-0.Bac	Effluent Group	Proteobacteria	Gammaproteobacteria	Betaproteobacteriales	Burkholderiaceae	Cupriavidus	unclassified_Cupriavidus	0	1	0	0	0	0	0	0	0	0	0	0	0	0	0	0	0	0	0	0	0	0	0	7	0	0	0	0	1	0	2	0	0	0	0	7	0	21	0	0	0	0
N-2016_refine.482-0.Bac	Effluent Group	Proteobacteria	Alphaproteobacteria	Rhodobacterales	Rhodobacteraceae	Rhodobacter_A	Rhodobacter_A ovatus	0	0	0	0	0	0	0	0	0	0	0	0	0	0	0	0	0	0	0	0	0	0	0	1	0	0	0	0	0	0	0	0	0	0	0	7	1	0	0	0	0	0
N-2016_refine.500-0.Bac	Effluent Group	Actinobacteriota	Acidimicrobiia	Microtrichales	Ilumatobacteraceae	UBA2093	unclassified_UBA2093	0	0	0	0	0	0	0	0	0	0	0	0	0	0	0	0	0	0	0	0	0	0	0	0	0	0	0	0	0	0	0	0	0	0	0	3	0	0	0	0	0	0
N-2016_refine.521.Bac	Effluent Group	Bacteroidota	Bacteroidia	Sphingobacteriales	unclassified_Sphingobacteriales	unclassified_Sphingobacteriales	unclassified_Sphingobacteriales	0	0	0	0	0	0	0	0	0	0	0	0	0	0	0	0	0	0	0	0	0	0	0	0	0	0	0	0	0	0	0	0	0	0	0	6	1	0	0	0	0	0
N-2016_refine.522.Bac	Effluent Group	Verrucomicrobiota	Kiritimatiellae	RFP12	UBA1067	UBA1067	unclassified_UBA1067	0	0	0	0	0	0	0	0	0	0	0	0	0	0	0	0	0	0	0	0	0	0	0	0	0	0	0	0	0	0	0	0	0	0	0	1	0	0	0	0	0	0
N-2016_refine.527.Bac	Effluent Group	Omnitrophota	UBA9649	2-02-FULL-51-18	unclassified_2-02-FULL-51-18	unclassified_2-02-FULL-51-18	unclassified_2-02-FULL-51-18	0	0	0	0	0	0	0	0	0	0	0	0	0	0	0	0	0	0	2	0	0	0	0	1	0	0	0	0	0	0	0	0	0	0	0	1	0	1	0	0	0	0
N-2016_refine.533.Bac	Effluent Group	Bacteroidota	Bacteroidia	Cytophagales	Cyclobacteriaceae	Algoriphagus	unclassified_Algoriphagus	0	0	0	0	0	0	0	0	0	0	0	0	0	0	0	0	0	0	0	0	0	0	0	1	0	0	0	0	0	0	0	0	0	0	0	4	0	0	0	0	0	0
N-2016_refine.540-0.Bac	Effluent Group	Bacteroidota	Bacteroidia	Sphingobacteriales	Sphingobacteriaceae	Pedobacter_A	unclassified_Pedobacter_A	0	0	0	0	0	0	0	0	0	0	0	0	0	0	0	0	0	0	2	0	0	0	0	1	0	0	0	0	0	0	0	0	0	0	0	2	0	0	0	0	0	0
N-2016_refine.542.Bac	Effluent Group	Actinobacteriota	Actinobacteria	Nanopelagicales	UBA10799	unclassified_UBA10799	unclassified_UBA10799	0	0	0	0	0	0	0	0	0	0	0	0	0	0	0	0	0	0	0	0	0	0	0	0	0	0	0	0	0	0	0	0	0	0	0	3	0	0	0	0	0	0
N-2016_refine.547.Bac	Effluent Group	Spirochaetota	Spirochaetia	Sphaerochaetales	Sphaerochaetaceae	unclassified_Sphaerochaetaceae	unclassified_Sphaerochaetaceae	0	0	0	0	0	0	0	0	0	0	0	0	0	0	0	0	0	0	0	0	0	0	0	0	0	0	0	0	0	0	0	0	0	0	0	3	0	0	0	0	0	0
N-2016_refine.549.Bac	Effluent Group	Bacteroidota	Bacteroidia	Chitinophagales	Chitinophagaceae	UBA1312	unclassified_UBA1312	0	0	0	0	0	0	0	0	0	0	0	0	0	0	0	0	0	0	2	0	0	0	0	0	0	0	0	0	0	0	0	0	0	0	0	3	0	0	0	0	0	0
P-2016_refine.295.Bac	Effluent Group	Proteobacteria	Gammaproteobacteria	Betaproteobacteriales	Burkholderiaceae	Vitreoscilla_A	unclassified_Vitreoscilla_A	0	0	0	0	0	0	0	0	0	0	0	0	0	0	0	0	0	0	1	0	0	0	0	6	0	0	0	0	0	0	0	0	0	0	0	28	1	5	0	0	0	0
P-2016_refine.306.Bac	Effluent Group	Proteobacteria	Gammaproteobacteria	Betaproteobacteriales	Burkholderiaceae	Ramlibacter	unclassified_Ramlibacter	0	0	0	0	0	0	0	0	0	0	0	0	0	0	0	0	0	0	1	0	0	0	0	14	0	0	0	0	0	0	0	0	0	0	0	11	0	5	0	0	0	0
P-2016_refine.313.Bac	Effluent Group	Proteobacteria	Gammaproteobacteria	Betaproteobacteriales	Burkholderiaceae	Massilia	unclassified_Massilia	0	0	0	0	0	0	0	0	0	0	0	0	0	0	0	0	0	0	0	0	0	0	0	7	0	0	0	0	0	0	1	0	0	0	0	3	2	2	0	0	0	0
P-2016_refine.316.Bac	Effluent Group	Proteobacteria	Gammaproteobacteria	Betaproteobacteriales	Burkholderiaceae	SCN-68-22	unclassified_SCN-68-22	0	0	0	0	0	0	0	0	0	0	0	0	0	0	0	0	0	0	0	0	0	0	0	0	0	0	0	0	0	0	0	0	0	0	0	5	0	11	0	0	0	0
P-2016_refine.327.Bac	Effluent Group	Verrucomicrobiota	Verrucomicrobiae	Opitutales	Opitutaceae	Opitutus	unclassified_Opitutus	0	0	0	0	0	0	0	0	0	0	0	0	0	0	0	0	0	0	0	0	0	0	0	6	0	0	0	0	0	0	0	0	0	0	0	20	0	37	0	0	0	0
P-2016_refine.328.Bac	Effluent Group	Proteobacteria	Gammaproteobacteria	Betaproteobacteriales	Burkholderiaceae	Comamonas_C	GCA_001725255.1	0	0	0	0	0	0	0	0	0	0	0	0	0	0	0	0	0	0	0	0	0	0	0	1	0	0	0	0	0	0	0	0	0	0	0	9	0	4	0	0	0	0
P-2016_refine.330.Bac	Effluent Group	Proteobacteria	Gammaproteobacteria	Betaproteobacteriales	Burkholderiaceae	Comamonas_B	Comamonas_B thiooxydans	0	0	0	0	0	0	0	0	0	0	0	0	0	0	0	0	0	0	7	0	0	0	0	2	0	0	0	0	0	0	1	0	0	0	0	16	0	19	0	0	0	0
P-2016_refine.331.Bac	Effluent Group	Proteobacteria	Alphaproteobacteria	Rhodobacterales	Rhodobacteraceae	Defluviimonas_A	unclassified_Defluviimonas_A	0	0	0	0	0	0	0	0	0	0	0	0	0	0	0	0	0	0	0	0	0	0	0	0	0	0	0	0	0	0	0	0	0	0	0	3	1	1	0	0	0	0
P-2016_refine.332-0.Bac	Effluent Group	Proteobacteria	Alphaproteobacteria	Rhodobacterales	Rhodobacteraceae	Defluviimonas_A	unclassified_Defluviimonas_A	0	0	0	0	0	0	0	0	0	0	0	0	0	0	0	0	0	0	0	0	0	0	0	4	0	0	0	0	0	0	0	0	0	0	0	14	1	2	0	0	0	0
P-2016_refine.336.Bac	Effluent Group	Proteobacteria	Alphaproteobacteria	Rhizobiales	Rhizobiaceae	unclassified_Rhizobiaceae	unclassified_Rhizobiaceae	0	0	0	0	0	0	0	0	0	0	0	0	0	0	0	0	0	0	1	0	0	0	0	0	0	0	0	0	0	0	0	0	0	0	0	3	0	2	0	0	0	0
P-2016_refine.337.Bac	Effluent Group	Actinobacteriota	Actinobacteria	Actinomycetales	Microbacteriaceae	Microbacterium	GCF_000411455.1	0	0	0	0	0	0	0	0	0	0	0	0	0	0	2	0	0	0	0	0	0	0	0	1	0	0	0	0	0	0	0	0	0	0	0	2	0	0	0	0	0	0
P-2016_refine.339.Bac	Effluent Group	Bacteroidota	Bacteroidia	Chitinophagales	Chitinophagaceae	BSSC1	unclassified_BSSC1	0	0	0	0	0	0	0	0	0	0	0	0	0	0	0	0	0	0	2	0	0	0	0	0	0	0	0	0	0	1	0	0	0	0	0	2	1	0	0	0	0	0
P-2016_refine.341.Bac	Effluent Group	Proteobacteria	Alphaproteobacteria	Sphingomonadales	Sphingomonadaceae	Novosphingobium	unclassified_Novosphingobium	0	0	0	0	0	0	0	0	0	0	0	0	0	0	0	0	0	0	2	0	0	0	0	6	0	0	0	0	0	0	0	0	0	0	0	3	0	2	0	0	0	0
P-2016_refine.343.Bac	Effluent Group	Proteobacteria	Alphaproteobacteria	Sphingomonadales	Sphingomonadaceae	Novosphingobium	unclassified_Novosphingobium	0	0	0	0	0	0	0	0	0	0	0	0	0	0	0	0	0	0	2	0	0	0	0	2	0	0	0	0	0	0	0	0	0	0	0	1	0	5	0	0	0	0
P-2016_refine.344.Bac	Effluent Group	Bacteroidota	Bacteroidia	Cytophagales	Spirosomaceae	Flectobacillus	unclassified_Flectobacillus	0	0	0	0	0	0	0	0	0	0	0	0	0	0	0	0	0	0	1	0	0	0	0	3	0	0	0	0	0	0	0	0	0	0	0	5	1	1	0	0	0	0
P-2016_refine.346-0.Bac	Effluent Group	Proteobacteria	Gammaproteobacteria	Betaproteobacteriales	unclassified_Betaproteobacteriales	unclassified_Betaproteobacteriales	unclassified_Betaproteobacteriales	0	0	0	0	0	0	0	0	0	0	0	0	0	0	0	0	0	0	0	0	0	0	0	4	0	0	0	0	0	0	0	0	0	0	0	6	0	5	0	0	0	0
P-2016_refine.347.Bac	Effluent Group	Actinobacteriota	Actinobacteria	Actinomycetales	Microbacteriaceae	Microbacterium	Microbacterium azadirachtae	0	0	0	0	0	0	0	0	0	0	0	0	0	0	1	0	0	0	0	0	0	0	0	0	0	0	0	0	0	0	0	0	0	0	0	7	1	0	0	0	0	0
P-2016_refine.354.Bac	Effluent Group	Proteobacteria	Gammaproteobacteria	Pseudomonadales	Pseudomonadaceae	Pseudomonas_E	unclassified_Pseudomonas_E	0	0	0	0	0	0	0	0	0	0	0	0	0	0	0	0	0	0	0	0	0	0	0	0	0	0	0	0	1	0	0	0	0	0	0	4	0	16	1	0	1	0
P-2016_refine.355-0.Bac	Effluent Group	Proteobacteria	Gammaproteobacteria	Betaproteobacteriales	Burkholderiaceae	Pusillimonas	unclassified_Pusillimonas	0	0	0	0	0	0	0	0	0	1	0	0	0	0	0	0	0	0	0	0	0	0	0	0	0	0	0	0	0	0	0	0	0	0	0	15	0	10	0	0	0	0
P-2016_refine.356.Bac	Effluent Group	Proteobacteria	Gammaproteobacteria	Betaproteobacteriales	Methylophilaceae	Methylobacillus	Methylobacillus glycogenes	0	0	0	0	0	0	0	0	0	0	0	0	0	0	0	0	0	0	0	0	0	0	0	4	0	0	0	0	0	0	0	0	0	0	0	99	0	85	0	0	0	0
P-2016_refine.357.Bac	Effluent Group	Proteobacteria	Alphaproteobacteria	Sphingomonadales	Sphingomonadaceae	Sphingobium	Sphingobium quisquiliarum	0	0	3	0	0	0	0	0	0	0	0	0	0	0	0	0	0	0	21	0	0	0	3	1	0	0	0	0	0	0	0	0	0	0	0	2	2	3	0	0	0	0
P-2016_refine.365.Bac	Effluent Group	Proteobacteria	Gammaproteobacteria	Pseudomonadales	Moraxellaceae	Acinetobacter	Acinetobacter johnsonii	0	0	0	0	0	0	0	0	0	0	0	0	0	0	0	0	0	0	0	0	0	0	0	0	0	0	0	0	0	0	2	0	0	0	0	0	0	3	0	1	0	0
P-2016_refine.366.Bac	Effluent Group	Proteobacteria	Gammaproteobacteria	Betaproteobacteriales	Methylophilaceae	Methylophilus	unclassified_Methylophilus	0	0	0	0	0	0	0	0	0	0	0	0	0	0	0	0	0	0	0	0	0	0	0	1	0	0	0	0	0	0	0	0	0	0	0	32	0	4	0	0	0	0
P-2016_refine.367-0.Bac	Effluent Group	Bacteroidota	Bacteroidia	Chitinophagales	Chitinophagaceae	unclassified_Chitinophagaceae	unclassified_Chitinophagaceae	0	0	0	0	0	0	0	0	0	0	0	0	0	0	0	0	0	0	0	0	0	0	0	0	0	0	0	0	0	0	0	0	0	0	0	3	1	0	0	0	0	0
P-2016_refine.371.Bac	Effluent Group	Bacteroidota	Bacteroidia	Sphingobacteriales	Sphingobacteriaceae	Pseudopedobacter	unclassified_Pseudopedobacter	0	0	0	0	0	0	0	0	0	0	0	0	0	0	0	0	0	0	0	0	0	0	0	2	0	0	0	0	0	0	0	0	0	0	0	13	6	0	0	0	0	0
P-2016_refine.373-0.Bac	Effluent Group	Bdellovibrionota	Bdellovibrionia	Bdellovibrionales	Bdellovibrionaceae	Bdellovibrio_A	unclassified_Bdellovibrio_A	0	0	0	0	0	0	0	0	0	0	0	0	0	0	0	0	0	0	0	0	0	0	0	0	0	0	0	0	0	0	0	0	0	0	0	2	1	1	0	0	0	0
P-2016_refine.380.Bac	Effluent Group	Proteobacteria	Gammaproteobacteria	Pseudomonadales	Saccharospirillaceae	unclassified_Saccharospirillaceae	unclassified_Saccharospirillaceae	0	0	0	0	0	0	0	0	0	0	0	0	0	0	0	0	0	0	0	0	0	0	0	0	1	0	0	0	0	0	0	0	0	0	0	1	0	0	0	0	0	0
P-2016_refine.384.Bac	Effluent Group	Bdellovibrionota	Bdellovibrionia	Bdellovibrionales	Bdellovibrionaceae	unclassified_Bdellovibrionaceae	unclassified_Bdellovibrionaceae	0	0	0	0	0	0	0	0	0	0	0	0	0	0	0	0	0	0	0	0	0	0	0	1	0	0	0	0	0	0	0	0	0	0	0	2	1	0	0	0	0	0
P-2016_refine.385.Bac	Effluent Group	Bacteroidota	Bacteroidia	AKYH767	GCA-2737665	GCA-2737665	unclassified_GCA-2737665	0	0	0	0	0	0	0	0	0	0	0	0	0	0	0	0	0	0	0	0	0	0	0	0	0	0	0	0	0	0	0	0	0	0	0	3	6	0	0	0	0	0
P-2016_refine.390-0.Bac	Effluent Group	Bdellovibrionota	Bdellovibrionia	Bdellovibrionales	Bdellovibrionaceae	unclassified_Bdellovibrionaceae	unclassified_Bdellovibrionaceae	0	0	0	0	0	0	0	0	0	0	0	0	0	0	0	0	0	0	0	0	0	0	0	0	0	0	0	0	0	0	0	0	0	0	0	2	1	0	0	0	0	0
SC-2017_refine.323-0.Bac	Effluent Group	Proteobacteria	Gammaproteobacteria	Pseudomonadales	Moraxellaceae	Acinetobacter	GCF_002135245.1	0	0	0	0	0	0	0	0	0	0	0	0	0	0	0	0	2	0	0	0	0	0	0	1	0	0	0	0	0	0	0	0	0	0	0	4	0	3	1	1	0	0
SC-2017_refine.324-0.Bac	Effluent Group	Actinobacteriota	Actinobacteria	Corynebacteriales	Corynebacteriaceae	Mycobacterium	unclassified_Mycobacterium	0	0	0	0	0	0	0	0	0	0	0	0	0	0	0	0	0	0	0	0	0	0	0	1	0	0	0	0	0	0	0	0	0	0	0	1	0	0	0	0	0	0
SC-2017_refine.330-0.Bac	Effluent Group	Actinobacteriota	Actinobacteria	Corynebacteriales	Corynebacteriaceae	Mycobacterium	unclassified_Mycobacterium	0	0	0	0	0	0	0	0	0	0	0	0	0	0	0	0	0	0	1	0	0	0	0	2	0	0	0	0	0	0	0	0	0	0	0	0	0	0	0	0	0	0
SC-2017_refine.348.Bac	Effluent Group	Proteobacteria	Gammaproteobacteria	Betaproteobacteriales	Burkholderiaceae	Paucibacter	unclassified_Paucibacter	0	0	0	0	0	0	0	0	0	0	0	0	0	0	0	0	0	0	2	0	0	0	0	2	0	0	0	0	0	0	0	0	0	0	0	4	0	5	0	0	0	0
SC-2017_refine.350.Bac	Effluent Group	Proteobacteria	Gammaproteobacteria	Betaproteobacteriales	Burkholderiaceae	Polaromonas	unclassified_Polaromonas	0	0	0	0	0	0	0	0	0	0	0	0	0	0	0	0	0	0	0	0	0	0	0	0	0	0	0	0	0	0	0	0	0	0	0	17	0	7	0	0	0	0
SC-2017_refine.356.Bac	Effluent Group	Proteobacteria	Gammaproteobacteria	Competibacterales	Competibacteraceae	unclassified_Competibacteraceae	unclassified_Competibacteraceae	0	0	0	0	0	0	0	0	0	0	0	0	0	0	0	0	0	0	1	0	0	0	0	0	0	0	0	0	0	0	1	0	0	0	0	2	0	0	0	0	0	0
SC-2017_refine.357.Bac	Effluent Group	Proteobacteria	Alphaproteobacteria	Rhizobiales	Xanthobacteraceae	Tardiphaga	unclassified_Tardiphaga	0	0	0	0	0	0	0	0	0	0	0	0	0	0	0	0	0	0	15	0	0	0	0	23	0	0	0	0	0	0	0	0	0	0	0	39	0	62	0	0	0	0
SC-2017_refine.365.Bac	Effluent Group	Patescibacteria	Paceibacteria	UBA6257	Wolfebacteraceae	WO2-47-17b	unclassified_WO2-47-17b	0	0	0	0	0	0	0	0	0	0	0	0	0	0	0	0	0	0	0	0	0	0	0	0	0	0	0	0	0	0	0	0	0	0	0	0	0	0	0	0	0	0
SC-2017_refine.367-0.Bac	Effluent Group	Patescibacteria	Paceibacteria	Moranbacterales	UBA1568	unclassified_UBA1568	unclassified_UBA1568	0	0	0	0	0	0	0	0	0	0	0	0	0	0	0	0	0	0	0	0	0	0	0	0	0	0	0	0	0	0	0	0	0	0	0	1	0	0	0	0	0	0
SC-2017_refine.376.Bac	Effluent Group	Proteobacteria	Gammaproteobacteria	Enterobacterales	Enterobacteriaceae	Ewingella	unclassified_Ewingella	0	0	0	0	0	0	0	0	0	0	0	0	0	0	0	0	0	0	0	0	0	0	0	9	0	0	0	0	3	0	0	0	0	0	0	32	14	90	0	0	0	1
SC-2017_refine.386-0.Bac	Effluent Group	Bacteroidota	Bacteroidia	Flavobacteriales	Weeksellaceae	Chryseobacterium	unclassified_Chryseobacterium	0	0	0	0	0	0	0	0	0	0	0	0	0	0	0	0	0	0	0	1	0	0	0	1	0	0	0	0	0	0	0	0	0	0	0	0	1	1	0	0	0	0
SC-2017_refine.390-0.Bac	Effluent Group	Patescibacteria	ABY1	Magasanikibacterales	UBA922	2-12-FULL-41-16	unclassified_2-12-FULL-41-16	0	0	0	0	0	0	0	0	0	0	0	0	0	0	0	0	0	0	0	0	0	0	0	0	0	0	0	0	0	0	0	0	0	0	0	0	0	0	0	0	0	0
SC-2017_refine.409-0.Bac	Effluent Group	Actinobacteriota	Actinobacteria	Actinomycetales	Micrococcaceae	Soil763	unclassified_Soil763	0	0	0	0	0	0	0	0	0	0	0	0	0	0	0	0	0	0	0	0	0	0	0	1	0	0	0	0	0	0	0	0	0	0	0	2	0	0	0	0	0	0
SC-2017_refine.411.Bac	Effluent Group	Bacteroidota	Bacteroidia	Cytophagales	Spirosomaceae	Flectobacillus	unclassified_Flectobacillus	0	0	0	0	0	0	0	0	0	0	0	0	0	0	0	0	0	0	1	0	0	0	0	1	0	0	0	0	0	0	0	0	0	0	0	5	1	0	0	0	0	0
SJ-2017_refine.290-0.Bac	Effluent Group	Actinobacteriota	Actinobacteria	Actinomycetales	Microbacteriaceae	Microbacterium	GCF_900155915.1	0	0	0	0	0	0	0	0	0	0	0	0	0	0	1	0	0	0	1	0	0	0	0	0	0	0	0	0	0	0	0	0	0	0	0	3	0	0	0	0	0	0
SJ-2017_refine.334-0.Bac	Effluent Group	Proteobacteria	Gammaproteobacteria	Betaproteobacteriales	Burkholderiaceae	Polaromonas	unclassified_Polaromonas	0	0	0	0	0	0	0	0	0	0	0	0	0	0	0	0	0	0	0	0	0	0	0	0	0	0	0	0	0	0	0	0	0	0	0	31	0	18	0	0	0	0
SJ-2017_refine.402.Bac	Effluent Group	Proteobacteria	Alphaproteobacteria	Sphingomonadales	Sphingomonadaceae	Sphingopyxis	unclassified_Sphingopyxis	0	0	1	0	0	0	0	0	0	0	0	0	0	0	0	0	0	0	1	0	0	0	0	1	0	0	0	0	0	0	0	0	0	0	0	3	2	3	0	0	0	0
SJ-2017_refine.408-0.Bac	Effluent Group	Proteobacteria	Alphaproteobacteria	Rhodobacterales	Rhodobacteraceae	Pseudorhodobacter_A	unclassified_Pseudorhodobacter_A	0	0	0	0	0	0	0	0	0	0	0	0	0	0	0	0	0	0	0	0	0	0	0	2	0	0	0	0	0	0	0	0	0	0	0	1	0	0	0	0	0	0
SJ-2017_refine.410.Bac	Effluent Group	Actinobacteriota	Actinobacteria	Actinomycetales	Microbacteriaceae	Microbacterium	unclassified_Microbacterium	0	0	0	0	0	0	0	0	0	0	0	0	0	0	2	0	0	0	0	0	0	0	0	0	0	0	0	0	0	0	0	0	0	0	0	6	1	0	0	0	0	0
SJ-2017_refine.412.Bac	Effluent Group	Proteobacteria	Gammaproteobacteria	Xanthomonadales	Xanthomonadaceae	Pseudoxanthomonas_A	unclassified_Pseudoxanthomonas_A	0	0	0	0	0	0	0	0	0	0	0	0	0	0	0	0	0	0	1	0	0	0	0	0	0	0	0	0	0	0	0	0	0	0	0	2	1	2	0	0	0	0
SJ-2017_refine.427-0.Bac	Effluent Group	Proteobacteria	Alphaproteobacteria	Sphingomonadales	Sphingomonadaceae	Sphingopyxis	unclassified_Sphingopyxis	0	0	0	0	0	0	0	0	0	0	0	0	0	0	0	0	0	0	2	0	0	0	0	2	0	0	0	0	0	0	0	0	0	0	0	8	0	3	0	0	0	0
SJ-2017_refine.437-0.Bac	Effluent Group	Actinobacteriota	Acidimicrobiia	Microtrichales	Microtrichaceae	IMCC26207	unclassified_IMCC26207	0	0	0	0	0	0	0	0	0	0	0	0	0	0	0	0	0	0	0	0	0	0	0	0	0	0	0	0	0	0	0	0	0	0	0	2	0	0	0	0	0	0
SJ-2017_refine.438-0.Bac	Effluent Group	Bacteroidota	Bacteroidia	Flavobacteriales	Weeksellaceae	Chryseobacterium_A	unclassified_Chryseobacterium_A	0	0	0	0	0	0	0	0	0	0	0	0	0	0	0	0	0	0	0	0	0	0	0	0	0	0	0	0	0	0	0	0	0	0	0	2	1	2	0	0	0	0
SJ-2017_refine.455-0.Bac	Effluent Group	Actinobacteriota	Actinobacteria	Nanopelagicales	UBA10799	unclassified_UBA10799	unclassified_UBA10799	0	0	0	0	0	0	0	0	0	0	0	0	0	0	0	0	0	0	0	0	0	0	0	0	0	0	0	0	0	0	0	0	0	0	0	2	0	0	0	0	0	0
SJ-2017_refine.456.Bac	Effluent Group	Patescibacteria	Saccharimonadia	Saccharimonadales	Saccharimonadaceae	UBA1547	unclassified_UBA1547	0	0	0	0	0	0	1	0	1	0	0	0	0	0	0	0	0	0	0	0	0	0	0	0	0	0	0	0	0	0	0	0	0	0	0	1	0	0	0	0	0	0
SJ-2017_refine.458-0.Bac	Effluent Group	Patescibacteria	ABY1	Falkowbacterales	UBA12465	GCA-002841655	unclassified_GCA-002841655	0	0	0	0	0	0	0	0	0	0	0	0	0	0	0	0	0	0	19	0	0	0	0	0	0	0	0	0	0	0	0	0	0	0	0	0	0	0	0	0	0	0
SJ-2017_refine.461-0.Bac	Effluent Group	Patescibacteria	Saccharimonadia	Saccharimonadales	Saccharimonadaceae	2011-GWC2-44-17	GCA_001029695.1	0	0	0	0	0	0	0	0	0	0	0	0	0	0	0	0	0	0	0	0	0	0	0	0	0	0	0	0	0	0	0	0	0	0	0	2	0	0	0	0	0	0
SJ-2017_refine.465.Bac	Effluent Group	Bacteroidota	Bacteroidia	Bacteroidales	UBA932	Bact-08	unclassified_Bact-08	0	0	0	0	0	0	0	0	0	0	0	0	0	0	0	0	0	0	0	0	0	0	0	0	0	0	0	0	0	0	0	0	0	0	0	1	0	0	0	0	0	0
SJ-2017_refine.466-0.Bac	Effluent Group	Proteobacteria	Gammaproteobacteria	Xanthomonadales	Xanthomonadaceae	Thermomonas	unclassified_Thermomonas	0	0	0	0	0	0	0	0	0	0	0	0	0	0	0	0	0	0	0	0	0	0	0	1	0	0	0	0	0	0	0	0	0	0	0	3	1	0	0	0	0	0
Y-2016_refine.477.Bac	Effluent Group	Proteobacteria	Gammaproteobacteria	Betaproteobacteriales	Rhodocyclaceae	Ga0074130	unclassified_Ga0074130	0	0	0	0	0	0	0	0	0	0	0	0	0	0	0	0	0	0	0	0	0	0	0	0	0	0	0	0	0	0	0	0	0	0	0	5	0	8	0	0	0	0
Y-2016_refine.499.Bac	Effluent Group	Actinobacteriota	Actinobacteria	Nanopelagicales	UBA10799	UBA10799	unclassified_UBA10799	0	0	0	0	0	0	0	0	0	0	0	0	0	0	0	0	0	0	0	0	0	0	0	0	0	0	0	0	0	0	0	0	0	0	0	2	0	0	0	0	0	0
Y-2016_refine.509-0.Bac	Effluent Group	Dependentiae	Babeliae	Babeliales	Babeliaceae	unclassified_Babeliaceae	unclassified_Babeliaceae	0	0	0	0	0	0	0	0	0	0	0	0	0	0	0	0	0	0	1	0	0	0	0	0	0	0	0	0	0	0	0	0	0	0	0	0	0	0	0	0	0	0
Y-2016_refine.509-1.Bac	Effluent Group	Campylobacterota	Campylobacteria	Campylobacterales	Arcobacteraceae	Arcobacter	Arcobacter cryaerophilus	0	0	0	0	0	0	0	0	0	0	0	0	0	0	0	0	0	0	0	0	0	0	0	1	0	0	0	0	0	0	1	0	0	0	0	1	0	1	0	0	0	0
Y-2016_refine.513.Bac	Effluent Group	Proteobacteria	Gammaproteobacteria	Betaproteobacteriales	UBA11063	UBA11063	unclassified_UBA11063	0	0	0	0	0	0	0	0	0	0	0	0	0	0	0	0	0	0	1	0	0	0	0	0	0	0	0	0	0	0	0	0	0	0	0	1	0	1	0	0	0	0
Y-2016_refine.539.Bac	Effluent Group	Patescibacteria	Paceibacteria	UBA9983	UBA5272	UBA5272	unclassified_UBA5272	0	0	0	0	0	0	0	0	0	0	0	0	0	0	0	0	0	0	0	0	0	0	0	0	0	0	0	0	0	0	0	0	0	0	0	0	0	0	0	0	0	0
Y-2016_refine.542-0.Bac	Effluent Group	Patescibacteria	Paceibacteria	UBA9983	Kaiserbacteraceae	HO2-49-34	unclassified_HO2-49-34	0	0	0	0	0	0	0	0	0	0	0	0	0	0	0	0	0	0	0	0	0	0	0	0	0	0	0	0	0	0	0	0	0	0	0	0	0	0	0	0	0	0
Y-2016_refine.549-0.Bac	Effluent Group	Patescibacteria	Saccharimonadia	Saccharimonadales	2-12-FULL-41-12	unclassified_2-12-FULL-41-12	unclassified_2-12-FULL-41-12	0	0	0	0	0	0	0	0	0	0	0	0	0	0	0	0	0	0	0	0	0	0	0	0	0	0	0	0	0	0	0	0	0	0	0	5	0	0	0	0	0	0
Y-2016_refine.565-0.Bac	Effluent Group	Patescibacteria	Paceibacteria	UBA9983	Nomurabacteraceae	unclassified_Nomurabacteraceae	unclassified_Nomurabacteraceae	0	0	0	0	0	0	0	0	0	0	0	0	0	0	0	0	0	0	0	0	0	0	0	0	0	0	0	0	0	0	0	0	0	0	0	0	0	0	0	0	0	0
Y-2016_refine.585-0.Bac	Effluent Group	Patescibacteria	Saccharimonadia	UBA4664	unclassified_UBA4664	unclassified_UBA4664	unclassified_UBA4664	0	0	0	0	0	0	0	0	0	0	0	0	0	0	0	0	0	0	0	0	0	0	0	0	0	0	0	0	0	0	0	0	0	0	0	0	0	0	0	0	0	0
Y-2016_refine.588-0.Bac	Effluent Group	Patescibacteria	Paceibacteria	UBA9983	Nomurabacteraceae	unclassified_Nomurabacteraceae	unclassified_Nomurabacteraceae	0	0	0	0	0	0	0	0	0	0	0	0	0	0	0	0	0	0	3	0	0	0	0	0	0	0	0	0	0	0	0	0	0	0	0	1	0	0	0	0	0	0
Y-2016_refine.591.Bac	Effluent Group	Patescibacteria	Paceibacteria	UBA9983	Kaiserbacteraceae	GWA1-54-10	unclassified_GWA1-54-10	0	0	0	0	0	0	0	0	0	0	0	0	0	0	0	0	0	0	0	0	0	0	0	0	0	0	0	0	0	0	0	0	0	0	0	14	0	0	0	0	0	0
Y-2016_refine.605.Bac	Effluent Group	Bdellovibrionota	Bdellovibrionia	Bdellovibrionales	Bdellovibrionaceae	unclassified_Bdellovibrionaceae	unclassified_Bdellovibrionaceae	0	0	0	0	0	0	0	0	0	0	0	0	0	0	0	0	0	0	0	0	0	0	0	0	0	0	0	0	0	0	0	0	0	0	0	1	0	0	0	0	0	0
Y-2016_refine.608.Bac	Effluent Group	Patescibacteria	ABY1	Falkowbacterales	UBA917	UBA917	UBA917 sp1	0	0	0	0	0	0	0	0	0	0	0	0	0	0	0	0	0	0	0	0	0	0	0	0	0	0	0	0	0	0	0	0	0	0	0	0	0	0	0	0	0	0
Y-2016_refine.609.Bac	Effluent Group	Patescibacteria	Saccharimonadia	Saccharimonadales	Saccharimonadaceae	UBA2112	unclassified_UBA2112	0	0	0	0	0	0	0	0	0	0	0	0	0	0	0	0	0	0	0	0	0	0	0	0	0	0	0	0	0	0	0	0	0	0	0	8	0	0	0	0	0	0
Y-2016_refine.614-0.Bac	Effluent Group	Patescibacteria	Paceibacteria	Moranbacterales	UBA1568	unclassified_UBA1568	unclassified_UBA1568	0	0	0	0	0	0	0	0	0	0	0	0	0	0	0	0	0	0	0	0	0	0	0	0	0	0	0	0	0	0	0	0	0	0	0	5	0	0	0	0	0	0
Y-2016_refine.618.Bac	Effluent Group	Patescibacteria	Saccharimonadia	Saccharimonadales	unclassified_Saccharimonadales	unclassified_Saccharimonadales	unclassified_Saccharimonadales	0	0	0	0	0	0	0	0	0	0	0	0	0	0	0	0	0	0	1	0	0	0	0	0	0	0	0	0	0	0	0	0	0	0	0	2	0	0	0	0	0	0
Y-2016_refine.623-0.Bac	Effluent Group	Patescibacteria	ABY1	Uhrbacterales	2-12-FULL-60-25	21-14-all-47-17	unclassified_21-14-all-47-17	0	0	0	0	0	0	0	0	0	0	0	0	0	0	0	0	0	0	0	0	0	0	0	0	0	0	0	0	0	0	0	0	0	0	0	4	0	0	0	0	0	0
Y-2016_refine.624-0.Bac	Effluent Group	Patescibacteria	Saccharimonadia	Saccharimonadales	unclassified_Saccharimonadales	unclassified_Saccharimonadales	unclassified_Saccharimonadales	0	0	0	0	0	0	0	0	0	0	0	0	0	0	0	0	0	0	0	0	0	0	0	0	0	0	0	0	0	0	0	0	0	0	0	3	0	0	0	0	0	0
Y-2017_refine.352.Bac	Effluent Group	Proteobacteria	Gammaproteobacteria	Betaproteobacteriales	UBA11063	UBA11063	unclassified_UBA11063	0	0	0	0	0	0	0	0	0	0	0	0	0	0	0	0	0	0	1	0	0	0	0	0	0	0	0	0	0	0	0	0	0	0	0	3	0	0	0	0	0	0
Y-2017_refine.370.Bac	Effluent Group	Actinobacteriota	Actinobacteria	Nanopelagicales	UBA10799	UBA10799	unclassified_UBA10799	0	0	0	0	0	0	0	0	0	0	0	0	0	0	0	0	0	0	0	0	0	0	0	0	0	0	0	0	0	0	0	0	0	0	0	2	0	0	0	0	0	0
Y-2017_refine.371.Bac	Effluent Group	Actinobacteriota	Actinobacteria	Actinomycetales	Microbacteriaceae	Microbacterium	unclassified_Microbacterium	0	0	0	0	0	0	0	0	0	0	0	0	0	0	0	0	0	0	0	0	0	0	0	0	0	0	0	0	0	0	0	0	0	0	0	19	0	0	0	0	0	0
Y-2017_refine.391.Bac	Effluent Group	Patescibacteria	ABY1	Falkowbacterales	UBA917	UBA917	UBA917 sp1	0	0	0	0	0	0	0	0	0	0	0	0	0	0	0	0	0	0	1	0	0	0	0	0	0	0	0	0	0	0	0	0	0	0	0	1	0	0	0	0	0	0
Y-2017_refine.392.Bac	Effluent Group	Proteobacteria	Gammaproteobacteria	Betaproteobacteriales	Burkholderiaceae	GJ-E10	unclassified_GJ-E10	0	0	0	0	0	0	0	0	0	0	0	0	0	0	0	0	0	0	0	0	0	0	0	0	0	0	0	0	0	0	0	0	0	0	0	1	0	0	0	0	0	0
Y-2017_refine.422.Bac	Effluent Group	Patescibacteria	ABY1	unclassified_ABY1	unclassified_ABY1	unclassified_ABY1	unclassified_ABY1	0	0	0	0	0	0	0	0	0	0	0	0	0	0	0	0	0	0	0	0	0	0	0	0	0	0	0	0	0	0	0	0	0	0	0	0	0	0	0	0	0	0
Y-2017_refine.434.Bac	Effluent Group	UBA10199	UBA10199	2-02-FULL-50-16	unclassified_2-02-FULL-50-16	unclassified_2-02-FULL-50-16	unclassified_2-02-FULL-50-16	0	0	0	0	0	0	0	0	0	0	0	0	0	0	0	0	0	0	0	0	0	0	0	0	0	0	0	0	0	0	0	0	0	0	0	0	0	1	0	0	0	0
Y-2017_refine.436.Bac	Effluent Group	Proteobacteria	Alphaproteobacteria	unclassified_Alphaproteobacteria	unclassified_Alphaproteobacteria	unclassified_Alphaproteobacteria	unclassified_Alphaproteobacteria	0	0	0	0	0	0	0	0	0	0	0	0	0	0	0	0	0	0	0	0	0	0	0	0	0	0	0	0	0	0	0	0	1	0	0	2	0	1	0	0	0	0
Y-2017_refine.448.Bac	Effluent Group	Patescibacteria	Gracilibacteria	Peribacterales	Peribacteraceae	unclassified_Peribacteraceae	unclassified_Peribacteraceae	0	0	0	0	0	0	0	0	0	0	0	0	0	0	0	0	0	0	1	0	0	0	0	0	0	0	0	0	0	0	0	0	0	0	0	0	0	0	0	0	0	0
Y-2017_refine.452.Bac	Effluent Group	Patescibacteria	Gracilibacteria	Peribacterales	Peribacteraceae	unclassified_Peribacteraceae	unclassified_Peribacteraceae	0	0	0	0	0	0	0	0	0	0	0	0	0	0	0	0	0	0	0	0	0	0	0	0	0	0	0	0	0	0	0	0	0	0	0	0	0	0	0	0	0	0
Y-2017_refine.456.Bac	Effluent Group	Patescibacteria	Gracilibacteria	Peribacterales	Peribacteraceae	unclassified_Peribacteraceae	unclassified_Peribacteraceae	0	0	0	0	0	0	0	0	0	0	0	0	0	0	0	0	0	0	1	0	0	0	0	0	0	0	0	0	0	0	0	0	0	0	0	0	0	0	0	0	0	0
Y-2017_refine.461.Bac	Effluent Group	Patescibacteria	Paceibacteria	UBA9983	Zambryskibacteraceae	unclassified_Zambryskibacteraceae	unclassified_Zambryskibacteraceae	0	0	0	0	0	0	0	0	0	0	0	0	0	0	0	0	0	0	13	0	0	0	0	0	0	0	0	0	0	0	0	0	0	0	0	0	0	0	0	0	0	0
Y-2017_refine.475.Bac	Effluent Group	Patescibacteria	Microgenomatia	Roizmanbacterales	GWC2-37-13	unclassified_GWC2-37-13	unclassified_GWC2-37-13	0	0	0	0	0	0	0	0	0	0	0	0	0	0	0	0	0	0	1	0	0	0	0	0	0	0	0	0	0	0	0	0	0	0	0	7	0	0	0	0	0	0
Y-2017_refine.476.Bac	Effluent Group	Proteobacteria	Gammaproteobacteria	Xanthomonadales	Rhodanobacteraceae	unclassified_Rhodanobacteraceae	unclassified_Rhodanobacteraceae	0	0	0	0	0	0	0	0	0	0	0	0	0	0	0	0	0	0	0	0	0	0	0	6	0	0	0	0	0	0	0	0	0	0	0	15	3	1	0	0	0	0
Y-2017_refine.477.Bac	Effluent Group	Verrucomicrobiota	Verrucomicrobiae	Chthoniobacterales	UBA6821	unclassified_UBA6821	unclassified_UBA6821	0	0	0	0	0	0	0	0	0	0	0	0	0	0	0	0	0	0	5	0	0	0	0	0	0	0	0	0	0	0	0	0	0	0	0	3	0	0	0	0	0	0
Y-2017_refine.480-0.Bac	Effluent Group	Patescibacteria	Paceibacteria	UBA9983	Nomurabacteraceae	UBA9973	unclassified_UBA9973	0	0	0	0	0	0	0	0	0	0	0	0	0	0	0	0	0	0	3	0	0	0	0	0	0	0	0	0	0	0	0	0	0	0	0	3	0	0	0	0	0	0
Y-2017_refine.495.Bac	Effluent Group	Bacteroidota	Bacteroidia	Bacteroidales	Paludibacteraceae	Paludibacter	unclassified_Paludibacter	0	0	0	0	0	0	0	0	0	0	0	0	0	0	0	0	0	0	0	0	0	0	0	1	0	0	0	0	0	0	0	0	0	0	0	1	0	0	0	0	0	0
Y-2017_refine.496-0.Bac	Effluent Group	Patescibacteria	Paceibacteria	UBA9983	Taylorbacteraceae	C7867-002	unclassified_C7867-002	0	0	0	0	0	0	0	0	0	0	0	0	0	0	0	0	0	0	6	0	0	0	0	0	0	0	0	0	0	0	0	0	0	0	0	6	0	0	0	0	0	0
Y-2017_refine.503.Bac	Effluent Group	Proteobacteria	Alphaproteobacteria	unclassified_Alphaproteobacteria	unclassified_Alphaproteobacteria	unclassified_Alphaproteobacteria	unclassified_Alphaproteobacteria	0	0	0	0	0	0	0	0	0	0	0	0	0	0	0	0	0	0	0	0	0	0	0	0	0	0	0	0	0	0	0	0	0	0	0	3	0	3	0	0	0	0
Y-2017_refine.508.Bac	Effluent Group	Proteobacteria	Gammaproteobacteria	Betaproteobacteriales	Ferrovaceae	unclassified_Ferrovaceae	unclassified_Ferrovaceae	0	0	0	0	0	0	0	0	0	0	0	0	0	0	0	0	0	0	0	0	0	0	0	0	0	0	0	0	0	0	0	0	0	0	0	2	0	6	0	0	0	0
Y-2017_refine.509.Bac	Effluent Group	Patescibacteria	Gracilibacteria	Peribacterales	Peribacteraceae	unclassified_Peribacteraceae	unclassified_Peribacteraceae	0	0	0	0	0	0	0	0	0	0	0	0	0	0	0	0	0	0	2	0	0	0	0	0	0	0	0	0	0	0	0	0	0	0	0	1	0	0	0	0	0	0
Y-2017_refine.510-0.Bac	Effluent Group	Patescibacteria	Paceibacteria	UBA9983	Nomurabacteraceae	unclassified_Nomurabacteraceae	unclassified_Nomurabacteraceae	0	0	0	0	0	0	0	0	0	0	0	0	0	0	0	0	0	0	3	0	0	0	0	0	0	0	0	0	0	0	0	0	0	0	0	0	0	0	0	0	0	0
Y-2017_refine.512-0.Bac	Effluent Group	Patescibacteria	Paceibacteria	UBA9983	Taylorbacteraceae	unclassified_Taylorbacteraceae	unclassified_Taylorbacteraceae	0	0	0	0	0	0	0	0	0	0	0	0	0	0	0	0	0	0	1	0	0	0	0	0	0	0	0	0	0	0	0	0	0	0	0	0	0	0	0	0	0	0
Y-2017_refine.520.Bac	Effluent Group	Patescibacteria	Paceibacteria	UBA9983	Zambryskibacteraceae	unclassified_Zambryskibacteraceae	unclassified_Zambryskibacteraceae	0	0	0	0	0	0	0	0	0	0	0	0	0	0	0	0	0	0	0	0	0	0	0	0	0	0	0	0	0	0	0	0	0	0	0	0	0	0	0	0	0	0
Y-2017_refine.522-0.Bac	Effluent Group	Dependentiae	Babeliae	Babeliales	GCA-2401785	unclassified_GCA-2401785	unclassified_GCA-2401785	0	0	0	0	0	0	0	0	0	0	0	0	0	0	0	0	0	0	0	0	0	0	0	0	0	0	0	0	0	0	0	0	0	0	0	0	0	0	0	0	0	0
Y-2017_refine.532-0.Bac	Effluent Group	Patescibacteria	Paceibacteria	UBA9983	Kaiserbacteraceae	UBA10103	unclassified_UBA10103	0	0	0	0	0	0	0	0	0	0	0	0	0	0	0	0	0	0	3	0	0	0	0	0	0	0	0	0	0	0	0	0	0	0	0	1	0	0	0	0	0	0
Y-2017_refine.534.Bac	Effluent Group	Patescibacteria	Gracilibacteria	Peribacterales	Peribacteraceae	unclassified_Peribacteraceae	unclassified_Peribacteraceae	0	0	0	0	0	0	0	0	0	0	0	0	0	0	0	0	0	0	1	0	0	0	0	0	0	0	0	0	0	0	0	0	0	0	0	0	0	0	0	0	0	0
Y-2017_refine.536.Bac	Effluent Group	Patescibacteria	Paceibacteria	Moranbacterales	UBA1568	unclassified_UBA1568	unclassified_UBA1568	0	0	0	0	0	0	0	0	0	0	0	0	0	0	0	0	0	0	0	0	0	0	0	0	0	0	0	0	0	0	0	0	0	0	0	2	0	0	0	0	0	0
Y-2017_refine.541.Bac	Effluent Group	Proteobacteria	Gammaproteobacteria	Pseudomonadales	Moraxellaceae	Acinetobacter	Acinetobacter harbinensis	0	0	0	0	0	0	0	0	0	0	0	0	0	0	0	0	0	0	0	0	0	0	0	0	0	0	0	0	0	0	0	0	0	0	0	1	0	1	0	1	0	0
Y-2017_refine.547.Bac	Effluent Group	Patescibacteria	Doudnabacteria	UBA920	UBA920	unclassified_UBA920	unclassified_UBA920	0	0	0	0	0	0	0	0	0	0	0	0	0	0	0	0	0	0	0	0	0	0	0	0	0	0	0	0	0	0	0	0	0	0	0	1	0	0	0	0	0	0
Y-2017_refine.561.Arc	Effluent Group	Micrarchaeota	Micrarchaeia	UBA8480	UBA8480	unclassified_UBA8480	unclassified_UBA8480	0	0	0	0	0	0	0	0	0	0	0	0	0	0	0	0	0	0	0	0	0	0	0	0	0	0	0	0	0	0	0	0	0	0	0	0	0	0	0	0	0	0
Y-2017_refine.566.Bac	Effluent Group	Patescibacteria	ABY1	Uhrbacterales	2-12-FULL-60-25	2-12-FULL-60-25	unclassified_2-12-FULL-60-25	0	0	0	0	0	0	0	0	0	0	0	0	0	0	0	0	0	0	0	0	0	0	0	0	0	0	0	0	0	0	0	0	0	0	0	3	0	0	0	0	0	0
Y-2017_refine.575.Bac	Effluent Group	Cyanobacteriota	Vampirovibrionia	Obscuribacterales	Obscuribacteraceae	Obscuribacter	unclassified_Obscuribacter	0	0	0	0	0	0	0	0	0	0	0	0	0	0	0	0	0	0	2	0	0	0	0	1	0	0	0	0	0	0	0	0	0	0	0	2	0	0	0	0	0	0
Y-2017_refine.577.Bac	Effluent Group	Patescibacteria	Paceibacteria	UBA9983	Taylorbacteraceae	C7867-002	unclassified_C7867-002	0	0	0	0	0	0	0	0	0	0	0	0	0	0	0	0	0	0	7	0	0	0	0	0	0	0	0	0	0	0	0	0	0	0	0	5	0	0	0	0	0	0
Y-2017_refine.579-0.Bac	Effluent Group	Patescibacteria	ABY1	Uhrbacterales	2-12-FULL-60-25	21-14-all-47-17	unclassified_21-14-all-47-17	0	0	0	0	0	0	0	0	0	0	0	0	0	0	0	0	0	0	0	0	0	0	0	0	0	0	0	0	0	0	0	0	0	0	0	2	0	0	0	0	0	0
Y-2017_refine.591.Bac	Effluent Group	Patescibacteria	Doudnabacteria	UBA920	UBA920	unclassified_UBA920	unclassified_UBA920	0	0	0	0	0	0	0	0	0	0	0	0	0	0	0	0	0	0	1	0	0	0	0	0	0	0	0	0	0	0	0	0	0	0	0	2	0	0	0	0	0	0
Y-2017_refine.593.Bac	Effluent Group	Patescibacteria	Doudnabacteria	UBA920	UBA920	unclassified_UBA920	unclassified_UBA920	0	0	0	0	0	0	0	0	0	0	0	0	0	0	0	0	0	0	2	0	0	0	0	0	0	0	0	0	0	0	0	0	0	0	0	3	0	0	0	0	0	0
Y-2017_refine.619.Bac	Effluent Group	Patescibacteria	Paceibacteria	UBA9983	Vogelbacteraceae	unclassified_Vogelbacteraceae	unclassified_Vogelbacteraceae	0	0	0	0	0	0	0	0	0	0	0	0	0	0	0	0	0	0	1	0	0	0	0	0	0	0	0	0	0	0	0	0	0	0	0	0	0	0	0	0	0	0
Y-2017_refine.627-0.Bac	Effluent Group	Patescibacteria	Paceibacteria	UBA9983	Kaiserbacteraceae	GWA1-54-10	unclassified_GWA1-54-10	0	0	0	0	0	0	0	0	0	0	0	0	0	0	0	0	0	0	0	0	0	0	0	0	0	0	0	0	0	0	0	0	0	0	0	0	0	0	0	0	0	0
Y-2017_refine.633.Arc	Effluent Group	Micrarchaeota	Iainarchaeia	unclassified_Iainarchaeia	unclassified_Iainarchaeia	unclassified_Iainarchaeia	unclassified_Iainarchaeia	0	0	0	0	0	0	0	0	0	0	0	0	0	0	0	0	0	0	0	0	0	0	0	0	0	0	0	0	0	0	0	0	0	0	0	1	0	0	0	0	0	0
Y-2017_refine.641.Bac	Effluent Group	Patescibacteria	Doudnabacteria	unclassified_Doudnabacteria	unclassified_Doudnabacteria	unclassified_Doudnabacteria	unclassified_Doudnabacteria	0	0	0	0	0	0	0	0	0	0	0	0	0	0	0	0	0	0	0	0	0	0	0	0	0	0	0	0	0	0	0	0	0	0	0	1	0	0	0	0	0	0
Y-2017_refine.647.Bac	Effluent Group	Omnitrophota	koll11	UBA10015	GCA-002753745	unclassified_GCA-002753745	unclassified_GCA-002753745	0	0	0	0	0	0	0	0	0	0	0	0	0	0	0	0	0	0	0	0	0	0	0	0	0	0	0	0	0	0	0	0	0	0	0	1	0	0	0	0	0	0
Y-2017_refine.649-0.Bac	Effluent Group	Patescibacteria	Paceibacteria	UBA9983	Lloydbacteraceae	unclassified_Lloydbacteraceae	unclassified_Lloydbacteraceae	0	0	0	0	0	0	0	0	0	0	0	0	0	0	0	0	0	0	1	0	0	0	0	0	0	0	0	0	0	0	0	0	0	0	0	0	0	0	0	0	0	0
Y-2017_refine.659-0.Bac	Effluent Group	Patescibacteria	Paceibacteria	UBA9983	Kaiserbacteraceae	unclassified_Kaiserbacteraceae	unclassified_Kaiserbacteraceae	0	0	0	0	0	0	0	0	0	0	0	0	0	0	0	0	0	0	1	0	0	0	0	0	0	0	0	0	0	0	0	0	0	0	0	1	0	0	0	0	0	0
Y-2017_refine.664.Arc	Effluent Group	Micrarchaeota	Iainarchaeia	unclassified_Iainarchaeia	unclassified_Iainarchaeia	unclassified_Iainarchaeia	unclassified_Iainarchaeia	0	0	0	0	0	0	0	0	0	0	0	0	0	0	0	0	0	0	0	0	0	0	0	0	0	0	0	0	0	0	0	0	0	0	0	0	0	0	0	0	0	0
Y-2017_refine.667.Arc	Effluent Group	Micrarchaeota	Iainarchaeia	unclassified_Iainarchaeia	unclassified_Iainarchaeia	unclassified_Iainarchaeia	unclassified_Iainarchaeia	0	0	0	0	0	0	0	0	0	0	0	0	0	0	0	0	0	0	0	0	0	0	0	0	0	0	0	0	0	0	0	0	0	0	0	3	0	0	0	0	0	0
YA-2016_refine.134-0.Bac	Effluent Group	Proteobacteria	Gammaproteobacteria	Betaproteobacteriales	Burkholderiaceae	Ramlibacter	unclassified_Ramlibacter	0	0	0	0	0	0	0	0	0	0	0	0	0	0	0	0	0	0	0	0	0	0	0	1	0	0	0	0	0	0	0	0	0	0	0	3	0	1	0	0	0	0
YA-2016_refine.143.Bac	Effluent Group	Proteobacteria	Gammaproteobacteria	Betaproteobacteriales	Methylophilaceae	Methylopumilus_A	unclassified_Methylopumilus_A	0	0	0	0	0	0	0	0	0	0	0	0	0	0	0	0	0	0	0	0	0	0	0	1	0	0	0	0	0	0	0	0	0	0	0	2	0	0	0	0	0	0
YA-2016_refine.169-0.Bac	Effluent Group	Proteobacteria	Alphaproteobacteria	Rhizobiales	Beijerinckiaceae	unclassified_Beijerinckiaceae	unclassified_Beijerinckiaceae	0	0	0	0	0	0	0	0	0	0	0	0	0	0	0	0	0	0	0	0	0	0	0	0	0	0	0	0	0	0	0	0	0	0	0	5	0	0	0	0	0	0
YA-2016_refine.173.Bac	Effluent Group	Proteobacteria	Alphaproteobacteria	Sphingomonadales	Sphingomonadaceae	Novosphingobium	unclassified_Novosphingobium	0	0	0	0	0	0	0	0	0	0	0	0	0	0	0	0	0	0	3	0	0	0	0	2	0	0	0	0	0	0	0	0	0	0	0	1	0	1	0	0	0	0
YA-2016_refine.177.Bac	Effluent Group	Proteobacteria	Alphaproteobacteria	Sphingomonadales	Sphingomonadaceae	Novosphingobium	unclassified_Novosphingobium	0	0	0	0	0	0	0	0	0	0	0	0	0	0	0	0	0	0	2	0	0	0	0	6	0	0	0	0	0	0	0	0	0	0	0	1	0	0	0	0	0	0
YA-2016_refine.178.Bac	Effluent Group	Proteobacteria	Gammaproteobacteria	Betaproteobacteriales	Burkholderiaceae	Limnohabitans	unclassified_Limnohabitans	0	0	0	0	0	0	0	0	0	0	0	0	0	0	0	0	0	0	0	0	0	0	0	2	0	0	0	0	0	0	0	0	0	0	0	6	9	1	0	0	0	0
YA-2016_refine.183-0.Bac	Effluent Group	Actinobacteriota	Actinobacteria	Actinomycetales	Microbacteriaceae	unclassified_Microbacteriaceae	unclassified_Microbacteriaceae	0	0	0	0	0	0	0	0	0	0	0	0	0	0	0	0	0	0	0	0	0	0	0	0	0	0	0	0	0	0	0	0	0	0	0	0	0	0	0	0	0	0
YA-2016_refine.185.Bac	Effluent Group	Proteobacteria	Alphaproteobacteria	Rhodobacterales	Rhodobacteraceae	unclassified_Rhodobacteraceae	unclassified_Rhodobacteraceae	0	0	0	0	0	0	0	0	0	0	0	0	0	0	0	0	0	0	0	0	0	0	0	0	0	0	0	0	0	0	0	0	0	0	0	13	1	0	0	0	0	0
YA-2016_refine.198-0.Bac	Effluent Group	Bacteroidota	Bacteroidia	Chitinophagales	Chitinophagaceae	BSSC1	unclassified_BSSC1	0	0	0	0	0	0	0	0	0	0	0	0	0	0	0	0	0	0	0	0	0	0	0	2	0	0	0	0	0	1	0	0	0	0	0	2	1	1	0	0	0	0
YA-2016_refine.236-0.Bac	Effluent Group	Bacteroidota	Bacteroidia	NS11-12g	UKL13-3	UBA6183	unclassified_UBA6183	0	0	0	0	0	0	0	0	0	0	0	0	0	0	0	0	0	0	0	0	0	0	0	0	0	0	0	0	0	0	0	0	0	0	0	3	1	0	0	0	0	0
YA-2016_refine.242.Bac	Effluent Group	Bacteroidota	Bacteroidia	Chitinophagales	Chitinophagaceae	UBA10320	unclassified_UBA10320	0	0	0	0	0	0	0	0	0	0	0	0	0	0	0	0	0	0	1	0	0	0	0	2	0	0	0	0	0	0	1	0	0	0	0	1	0	1	0	0	0	0
YA-2016_refine.255.Bac	Effluent Group	Patescibacteria	Paceibacteria	UBA9983	GCA-2401445	unclassified_GCA-2401445	unclassified_GCA-2401445	0	0	0	0	0	0	0	0	0	0	0	0	0	0	0	0	0	0	0	0	0	0	0	0	0	0	0	0	0	0	0	0	0	0	0	2	0	0	0	0	0	0
YA-2016_refine.278.Bac	Effluent Group	Bacteroidota	Bacteroidia	Flavobacteriales	Weeksellaceae	Cloacibacterium	unclassified_Cloacibacterium	0	0	0	0	0	0	0	0	0	0	0	0	0	0	0	0	0	0	1	0	0	0	0	0	0	0	0	0	0	0	0	0	0	0	0	3	1	0	0	0	0	0
YA-2016_refine.306.Bac	Effluent Group	Actinobacteriota	Actinobacteria	Actinomycetales	Microbacteriaceae	Rhodoluna	unclassified_Rhodoluna	0	0	0	0	0	0	0	0	0	0	0	0	0	0	0	0	0	0	0	0	0	0	0	0	0	0	0	0	0	0	0	0	0	0	0	1	0	0	0	0	0	0
YA-2016_refine.307-0.Bac	Effluent Group	Fusobacteriota	Fusobacteriia	Fusobacteriales	unclassified_Fusobacteriales	unclassified_Fusobacteriales	unclassified_Fusobacteriales	0	0	0	0	0	0	0	0	0	0	0	0	0	0	0	0	0	0	0	0	0	0	0	0	0	0	0	0	0	0	0	0	0	0	0	3	0	0	0	0	0	0
YA-2016_refine.310.Bac	Effluent Group	Verrucomicrobiota	Verrucomicrobiae	Verrucomicrobiales	Akkermansiaceae	UBA1315	unclassified_UBA1315	0	0	0	0	0	0	0	0	0	0	0	0	0	0	0	0	0	0	0	0	0	0	0	0	0	0	0	0	0	0	0	0	0	0	0	13	1	1	0	0	0	0
YA-2016_refine.317.Bac	Effluent Group	Bacteroidota	Bacteroidia	NS11-12g	UBA955	unclassified_UBA955	unclassified_UBA955	0	0	0	0	0	0	0	0	0	0	0	0	0	0	0	0	0	0	1	0	0	0	0	0	0	0	0	0	0	0	0	0	0	0	0	4	0	0	0	0	0	0
YA-2016_refine.320-0.Bac	Effluent Group	Bacteroidota	Bacteroidia	Chitinophagales	Chitinophagaceae	UBA3961	unclassified_UBA3961	0	0	0	0	0	0	0	0	0	0	0	0	0	0	0	0	0	0	0	0	0	0	0	0	0	0	0	0	0	0	0	0	0	0	0	3	5	0	0	0	0	0
AJ-2017_refine.020-0.Bac	Other	Bacteroidota	Bacteroidia	Flavobacteriales	Flavobacteriaceae	Flavobacterium	Flavobacterium johnsoniae	0	0	0	0	0	0	0	0	0	0	0	0	0	0	0	0	0	0	0	0	0	0	0	0	0	2	0	0	0	0	0	0	0	0	0	2	0	0	0	0	0	0
AJ-2017_refine.023.Bac	Other	Proteobacteria	Alphaproteobacteria	Sphingomonadales	Sphingomonadaceae	Sphingomonas	unclassified_Sphingomonas	0	0	0	0	0	0	0	0	0	0	0	0	0	0	0	0	0	0	1	0	0	0	0	1	0	0	0	0	0	0	0	0	0	0	0	1	1	3	0	0	0	0
AJ-2017_refine.066-0.Bac	Other	Proteobacteria	Gammaproteobacteria	Betaproteobacteriales	Rhodocyclaceae	unclassified_Rhodocyclaceae	unclassified_Rhodocyclaceae	0	0	0	0	0	0	0	0	0	0	0	0	0	0	0	0	0	0	0	0	0	0	0	0	0	0	0	0	0	0	0	0	0	0	0	2	0	4	0	0	0	0
AJ-2017_refine.073-0.Bac	Other	Proteobacteria	Alphaproteobacteria	Caulobacterales	Caulobacteraceae	Caulobacter	unclassified_Caulobacter	0	0	0	0	0	0	0	0	0	0	0	0	0	0	0	0	0	0	2	0	0	0	0	2	0	0	0	0	0	0	0	0	0	0	0	3	0	0	0	0	0	0
AJ-2017_refine.101-0.Bac	Other	Bacteroidota	Bacteroidia	Flavobacteriales	Weeksellaceae	Chryseobacterium	unclassified_Chryseobacterium	0	0	0	0	0	0	0	0	0	0	0	1	0	0	0	0	0	0	0	1	0	0	0	2	0	0	0	0	0	0	0	0	0	0	0	1	1	1	0	0	0	0
AJ-2017_refine.198.Bac	Other	Actinobacteriota	Actinobacteria	Propionibacteriales	Nocardioidaceae	Nocardioides	unclassified_Nocardioides	0	0	0	0	0	0	0	0	0	0	0	0	0	0	0	0	0	0	0	0	0	0	0	2	0	0	0	0	0	0	0	0	0	0	0	1	0	0	0	0	0	0
AJ-2017_refine.244.Bac	Other	Actinobacteriota	Acidimicrobiia	Microtrichales	Ilumatobacteraceae	UBA2093	unclassified_UBA2093	0	0	0	0	0	0	0	0	0	0	0	0	0	0	0	0	0	0	0	0	0	0	0	1	0	0	0	0	0	0	0	0	0	0	0	5	0	0	0	0	0	0
AJ-2017_refine.246-0.Bac	Other	Proteobacteria	Alphaproteobacteria	Rhizobiales	Rhizobiaceae	unclassified_Rhizobiaceae	unclassified_Rhizobiaceae	0	0	0	0	0	0	0	0	0	0	0	0	0	0	0	0	0	0	0	0	0	0	0	0	0	0	0	0	0	0	0	0	0	0	0	3	1	0	0	0	0	0
AJ-2017_refine.251.Bac	Other	Proteobacteria	Gammaproteobacteria	Betaproteobacteriales	Burkholderiaceae	Polaromonas	unclassified_Polaromonas	0	0	0	0	0	0	0	0	0	0	0	0	0	0	0	0	0	0	0	0	0	0	0	1	0	0	0	0	0	0	0	0	0	0	0	2	0	3	0	0	0	0
AJ-2017_refine.315.Bac	Other	Bacteroidota	Bacteroidia	Chitinophagales	Chitinophagaceae	UBA1931	unclassified_UBA1931	0	0	0	0	0	0	0	0	0	0	0	0	0	0	0	0	0	0	1	0	0	0	0	2	0	0	0	0	0	0	1	0	0	0	0	3	1	0	0	0	0	0
CJ-2018_refine.132-0.Bac	Other	Proteobacteria	Alphaproteobacteria	Sphingomonadales	Sphingomonadaceae	UBA1936	unclassified_UBA1936	0	0	0	0	0	0	0	0	0	0	0	0	0	0	0	0	0	0	0	0	0	0	0	0	0	0	0	0	0	0	0	0	0	0	0	1	1	0	0	0	0	0
CJ-2018_refine.135-0.Bac	Other	Verrucomicrobiota	Verrucomicrobiae	Verrucomicrobiales	Akkermansiaceae	UBA1315	unclassified_UBA1315	0	0	0	0	0	0	0	0	0	0	0	0	0	0	0	0	0	0	0	0	0	0	0	0	0	0	0	0	0	0	0	0	0	0	0	2	0	0	0	0	0	0
CJ-2018_refine.142.Bac	Other	Bacteroidota	Bacteroidia	Chitinophagales	Chitinophagaceae	unclassified_Chitinophagaceae	unclassified_Chitinophagaceae	0	0	0	0	0	0	0	0	0	0	0	0	0	0	0	0	0	0	1	0	0	0	0	0	0	0	0	0	0	0	0	0	0	0	0	2	1	0	0	0	0	0
CJ-2018_refine.379.Bac	Other	Chloroflexota	Chloroflexia	Chloroflexales	Roseiflexaceae	UBA965	unclassified_UBA965	0	0	1	0	1	0	0	0	0	0	0	0	0	0	0	0	0	0	1	0	0	0	0	0	0	0	0	0	0	0	0	0	0	0	0	9	0	0	0	0	0	0
G-2016_refine.126-0.Bac	Other	Proteobacteria	Gammaproteobacteria	Pseudomonadales	Pseudomonadaceae	Pseudomonas_E	Pseudomonas_E monteilii	0	0	0	0	0	0	0	0	0	0	0	0	0	0	0	0	0	0	0	0	0	0	0	0	0	0	0	0	1	0	0	0	0	0	0	3	0	5	1	0	0	0
IW-2016_refine.051.Bac	Other	Bacteroidota	Bacteroidia	Chitinophagales	Chitinophagaceae	unclassified_Chitinophagaceae	unclassified_Chitinophagaceae	0	0	0	0	0	0	0	0	0	0	0	0	0	0	0	0	0	0	0	0	0	0	0	0	0	0	0	0	0	1	0	0	0	0	0	2	0	0	0	0	0	0
IW-2016_refine.116.Bac	Other	Bacteroidota	Bacteroidia	NS11-12g	UBA955	unclassified_UBA955	unclassified_UBA955	0	0	0	0	0	0	0	0	0	0	0	0	0	0	0	0	0	0	0	0	0	0	0	1	0	0	0	0	0	0	0	0	0	0	0	3	0	0	0	0	0	0
IW-2016_refine.153.Bac	Other	Proteobacteria	Alphaproteobacteria	Rhodospirillales	Magnetospirillaceae	unclassified_Magnetospirillaceae	unclassified_Magnetospirillaceae	0	0	0	0	0	0	0	0	0	0	0	0	0	0	0	0	0	0	0	0	0	0	0	0	0	0	0	0	0	0	0	0	0	0	0	1	0	2	0	0	0	0
IW-2016_refine.222.Bac	Other	Proteobacteria	Alphaproteobacteria	Rickettsiales	Midichloriaceae	Midichloria	unclassified_Midichloria	0	0	0	0	0	0	0	0	0	0	0	0	0	0	0	0	0	0	0	0	0	0	0	0	0	0	0	0	0	0	1	0	0	0	0	2	0	0	0	0	0	0
IW-2016_refine.506.Bac	Other	Bacteroidota	Bacteroidia	AKYH767	GCA-2737665	unclassified_GCA-2737665	unclassified_GCA-2737665	0	0	0	0	0	0	0	0	0	0	0	0	0	0	0	0	0	0	0	0	0	0	0	0	0	0	0	0	0	0	0	0	0	0	0	3	0	0	0	0	0	0
IW-2016_refine.518-0.Bac	Other	Bacteroidota	Bacteroidia	Flavobacteriales	UA16	UBA4660	unclassified_UBA4660	0	0	0	0	0	0	0	0	0	0	0	0	0	0	0	0	0	0	0	0	0	0	0	0	0	0	0	0	0	0	0	0	0	0	0	3	1	0	0	0	0	0
IW-2016_refine.519-0.Bac	Other	Bacteroidota	Bacteroidia	Flavobacteriales	GCA-002722245	unclassified_GCA-002722245	unclassified_GCA-002722245	0	0	0	0	0	0	0	0	0	0	0	0	0	0	0	0	0	0	0	0	0	0	0	0	0	0	0	0	0	0	0	0	0	0	0	4	0	0	0	0	0	0
IW-2016_refine.520-0.Bac	Other	Bacteroidota	Bacteroidia	UBA7662	UBA7662	unclassified_UBA7662	unclassified_UBA7662	0	0	0	0	0	0	0	0	0	0	0	0	0	0	0	0	0	0	0	0	0	0	0	0	0	0	0	0	0	0	0	0	0	0	0	3	0	0	0	0	0	0
IW-2017_refine.114.Bac	Other	Actinobacteriota	Actinobacteria	Nanopelagicales	S36-B12	unclassified_S36-B12	unclassified_S36-B12	0	0	0	0	0	0	0	0	0	0	0	0	0	0	0	0	0	0	0	0	0	0	0	0	0	0	0	0	0	0	0	0	0	0	0	2	0	0	0	0	0	0
IW-2017_refine.115.Bac	Other	Proteobacteria	Alphaproteobacteria	Sphingomonadales	Sphingomonadaceae	Ga0077559	unclassified_Ga0077559	0	0	0	0	0	0	0	0	0	0	0	0	0	0	0	0	0	0	3	0	0	0	0	0	0	0	0	0	0	0	0	0	0	0	0	2	0	0	0	0	0	0
IW-2017_refine.124-0.Bac	Other	Actinobacteriota	Actinobacteria	Actinomycetales	Microbacteriaceae	Rhodoluna	unclassified_Rhodoluna	0	0	0	0	0	0	0	0	0	0	0	0	0	0	0	0	0	0	0	0	0	0	0	0	0	0	0	0	0	0	0	0	0	0	0	2	0	0	0	0	0	0
IW-2017_refine.263.Bac	Other	Chloroflexota	Chloroflexia	Chloroflexales	Roseiflexaceae	UBA965	unclassified_UBA965	0	0	1	0	1	0	0	0	0	0	0	0	0	0	0	0	0	0	1	0	0	0	0	0	0	0	0	0	0	0	0	0	0	0	0	2	0	0	0	0	0	0
IW-2017_refine.300-0.Bac	Other	Proteobacteria	Alphaproteobacteria	Sphingomonadales	Sphingomonadaceae	Sandarakinorhabdus	unclassified_Sandarakinorhabdus	0	0	0	0	0	0	0	0	0	0	0	0	0	0	0	0	0	0	1	0	0	0	0	1	0	0	0	0	0	0	0	0	0	0	0	2	1	1	0	0	0	0
IW-2017_refine.324-0.Bac	Other	Actinobacteriota	Actinobacteria	Actinomycetales	Microbacteriaceae	unclassified_Microbacteriaceae	unclassified_Microbacteriaceae	0	0	0	0	0	0	0	0	0	0	0	0	0	0	0	0	0	0	0	0	0	0	0	0	0	0	0	0	0	0	0	0	0	0	0	1	0	0	0	0	0	0
IW-2017_refine.344-0.Bac	Other	Bacteroidota	Bacteroidia	Chitinophagales	Chitinophagaceae	Sediminibacterium	unclassified_Sediminibacterium	0	0	0	0	0	0	0	0	0	0	0	0	0	0	0	0	0	0	0	0	0	0	0	0	0	0	0	0	0	0	0	0	0	0	0	1	1	0	0	0	0	0
IW-2017_refine.348.Bac	Other	Bacteroidota	Bacteroidia	Cytophagales	Cyclobacteriaceae	Algoriphagus	unclassified_Algoriphagus	0	0	0	0	0	0	0	0	0	0	0	0	0	0	0	0	0	0	0	0	0	0	0	1	0	0	0	0	0	0	0	0	0	0	0	5	0	0	0	0	0	0
IW-2017_refine.358-0.Bac	Other	Bacteroidota	Bacteroidia	Flavobacteriales	GCA-002722245	unclassified_GCA-002722245	unclassified_GCA-002722245	0	0	0	0	0	0	0	0	0	0	0	0	0	0	0	0	0	0	0	0	0	0	0	0	0	0	0	0	0	0	0	0	0	0	0	3	0	0	0	0	0	0
IW-2017_refine.480.Bac	Other	Proteobacteria	Alphaproteobacteria	Rhodobacterales	Rhodobacteraceae	32-66-9	unclassified_32-66-9	0	0	0	0	0	0	0	0	0	0	0	0	0	0	0	0	0	0	0	0	0	0	0	2	0	0	0	0	0	0	0	0	0	0	0	5	1	0	0	0	0	0
IW-2017_refine.493-0.Bac	Other	Gemmatimonadota	Gemmatimonadetes	Gemmatimonadales	Gemmatimonadaceae	Gemmatimonas	unclassified_Gemmatimonas	0	0	0	0	0	0	0	0	0	0	0	0	0	0	0	0	0	0	1	0	0	0	0	2	0	0	0	0	0	0	0	0	0	0	0	4	0	0	0	0	0	0
IW-2017_refine.498-0.Bac	Other	Actinobacteriota	Actinobacteria	Corynebacteriales	Corynebacteriaceae	Mycobacterium	Mycobacterium insubricum	0	0	0	0	0	0	0	0	0	0	0	0	0	0	0	0	0	0	1	0	0	0	0	0	0	0	0	0	0	0	0	0	0	0	0	1	0	0	0	0	0	0
IW-2017_refine.551.Bac	Other	Bacteroidota	Rhodothermia	Balneolales	unclassified_Balneolales	unclassified_Balneolales	unclassified_Balneolales	0	0	0	0	0	0	0	0	0	0	0	0	0	0	0	0	0	0	2	0	0	0	0	1	0	0	0	0	0	0	0	0	0	0	0	1	0	0	0	0	0	0
IW-2017_refine.560.Bac	Other	Proteobacteria	Gammaproteobacteria	Betaproteobacteriales	Burkholderiaceae	unclassified_Burkholderiaceae	unclassified_Burkholderiaceae	0	0	0	0	0	0	0	0	0	0	0	0	0	0	0	0	0	0	0	0	0	0	0	0	0	0	0	0	0	0	0	0	0	0	0	3	0	1	0	0	0	0
IW-2017_refine.572-0.Bac	Other	Actinobacteriota	Actinobacteria	Actinomycetales	Microbacteriaceae	Plantibacter	Plantibacter flavus_A	0	0	0	0	0	0	0	0	0	0	0	0	0	0	0	0	0	0	0	0	0	0	0	0	0	0	0	0	0	0	0	0	0	0	0	1	0	0	0	0	0	0
IW-2017_refine.586-0.Bac	Other	Patescibacteria	Saccharimonadia	Saccharimonadales	unclassified_Saccharimonadales	unclassified_Saccharimonadales	unclassified_Saccharimonadales	0	0	0	0	0	0	0	0	0	0	0	0	0	0	0	0	0	0	1	0	0	0	0	0	0	0	0	0	0	0	0	0	0	0	0	2	0	0	0	0	0	0
IW-2017_refine.592.Bac	Other	Bacteroidota	Bacteroidia	Flavobacteriales	Weeksellaceae	Chryseobacterium	Chryseobacterium taihuense	0	0	0	0	0	0	0	0	0	0	0	0	0	0	0	0	0	0	3	0	0	0	0	1	0	0	0	0	0	0	0	0	0	0	0	3	2	0	0	0	0	0
IW-2017_refine.594-0.Bac	Other	Patescibacteria	Paceibacteria	Moranbacterales	UBA1568	UBA1568	unclassified_UBA1568	0	0	0	0	0	0	0	0	0	0	0	0	0	0	0	0	0	0	0	0	0	0	0	0	0	0	0	0	0	0	0	0	0	0	0	0	0	0	0	0	0	0
IW-2017_refine.595-0.Bac	Other	Patescibacteria	Saccharimonadia	Saccharimonadales	unclassified_Saccharimonadales	unclassified_Saccharimonadales	unclassified_Saccharimonadales	0	0	0	0	0	0	0	0	0	0	0	0	0	0	0	0	0	0	0	0	0	0	0	0	0	0	0	0	0	0	0	0	0	0	0	0	0	0	0	0	0	0
IW-2017_refine.597-0.Bac	Other	Proteobacteria	Gammaproteobacteria	Betaproteobacteriales	Burkholderiaceae	Lampropedia	unclassified_Lampropedia	0	0	0	0	0	0	0	0	0	0	0	0	0	0	0	0	0	0	0	0	0	0	0	1	0	0	0	0	1	0	0	0	0	0	0	4	0	0	0	0	0	0
IW-2017_refine.598.Bac	Other	Patescibacteria	Saccharimonadia	Saccharimonadales	unclassified_Saccharimonadales	unclassified_Saccharimonadales	unclassified_Saccharimonadales	0	0	0	0	0	0	0	0	0	0	0	0	0	0	0	0	0	0	2	0	0	0	0	0	0	0	0	0	0	0	0	0	0	0	0	1	0	0	0	0	0	0
IW-2017_refine.599.Bac	Other	Patescibacteria	Saccharimonadia	Saccharimonadales	unclassified_Saccharimonadales	unclassified_Saccharimonadales	unclassified_Saccharimonadales	0	0	0	0	0	0	0	0	0	0	0	0	0	0	0	0	0	0	1	0	0	0	0	0	0	0	0	0	0	0	0	0	0	0	0	2	0	0	0	0	0	0
IW-2017_refine.608.Bac	Other	Proteobacteria	Gammaproteobacteria	Thiomicrospirales	GCA-002282575	GCA-002282575	GCA-002282575 sp1	0	0	0	0	0	0	0	0	0	0	0	0	0	0	0	0	0	0	0	0	0	0	0	2	0	0	0	0	0	0	0	0	0	0	0	3	0	1	0	0	0	0
IW-2017_refine.621.Bac	Other	Proteobacteria	Gammaproteobacteria	Betaproteobacteriales	Burkholderiaceae	unclassified_Burkholderiaceae	unclassified_Burkholderiaceae	0	0	0	0	0	0	0	0	0	0	0	0	0	0	0	0	0	0	0	0	0	0	0	0	0	0	0	0	0	0	0	0	0	0	0	3	0	12	0	0	0	0
IW-2017_refine.626.Bac	Other	Proteobacteria	Gammaproteobacteria	Pseudomonadales	Moraxellaceae	Acinetobacter	Acinetobacter bohemicus	0	0	0	0	0	0	0	0	0	0	0	0	0	0	0	0	0	0	0	0	0	0	0	0	0	0	0	0	0	0	0	0	0	0	0	1	0	1	1	0	0	0
IW-2017_refine.636.Bac	Other	Proteobacteria	Alphaproteobacteria	Rhodospirillales	Rhodospirillaceae	Haematospirillum	unclassified_Haematospirillum	0	3	0	0	0	0	0	0	0	0	0	0	0	0	0	0	0	0	1	0	0	0	0	0	0	0	0	0	0	0	0	0	0	0	0	1	0	1	0	0	0	0
IW-2017_refine.646.Bac	Other	Proteobacteria	Gammaproteobacteria	Chromatiales	Chromatiaceae	Allochromatium	Allochromatium warmingii	0	0	0	0	0	0	0	0	0	0	0	0	0	0	0	0	0	0	0	0	0	0	0	0	0	0	0	0	0	0	0	0	0	0	0	3	0	1	0	0	0	0
IW-2017_refine.652.Bac	Other	Firmicutes_A	Clostridia	Saccharofermentanales	UBA5734	UBA5734	unclassified_UBA5734	0	0	0	0	0	0	0	0	0	0	0	0	0	0	0	0	0	0	2	0	0	0	0	0	0	0	0	0	0	0	0	0	0	0	0	0	0	0	0	0	0	0
IW-2017_refine.659-0.Bac	Other	Firmicutes	Bacilli	Exiguobacterales	Exiguobacteraceae	Exiguobacterium_A	Exiguobacterium_A sibiricum	0	0	0	0	0	0	0	0	0	0	0	0	0	0	0	0	0	0	0	0	0	0	0	0	0	0	0	0	0	0	0	0	0	0	0	3	0	0	0	0	0	0
IW-2018_refine.186.Bac	Other	Proteobacteria	Alphaproteobacteria	Rhodobacterales	Rhodobacteraceae	Pseudorhodobacter_A	unclassified_Pseudorhodobacter_A	0	0	0	0	0	0	0	0	0	0	0	0	0	0	0	0	0	0	0	0	0	0	0	2	0	0	0	0	0	0	0	0	0	0	0	4	1	0	0	0	0	0
IW-2018_refine.498-0.Bac	Other	Patescibacteria	Paceibacteria	UBA9983	Nomurabacteraceae	2-01-FULL-33-17	unclassified_2-01-FULL-33-17	0	0	0	0	0	0	0	0	0	0	0	0	0	0	0	0	0	0	1	0	0	0	0	0	0	0	0	0	0	0	0	0	0	0	0	1	0	0	0	0	0	0
IW-2018_refine.532.Bac	Other	Proteobacteria	Alphaproteobacteria	Micavibrionales	Micavibrionaceae	unclassified_Micavibrionaceae	unclassified_Micavibrionaceae	0	0	0	0	0	0	0	0	0	0	0	0	0	0	0	0	0	0	0	0	0	0	0	0	0	0	0	0	0	0	0	0	0	0	0	1	0	0	0	0	0	0
IW-2018_refine.8.Bac	Other	Proteobacteria	Gammaproteobacteria	Pseudomonadales	Pseudomonadaceae	Pseudomonas_E	Pseudomonas_E monteilii_B	0	0	0	0	0	0	0	0	0	0	0	0	0	2	0	0	0	2	0	0	0	0	0	2	0	0	0	0	1	0	0	0	0	0	0	13	0	19	2	0	0	0
J-2017_refine.021-0.Bac	Other	Proteobacteria	Gammaproteobacteria	Betaproteobacteriales	Rhodocyclaceae	Dechloromonas	unclassified_Dechloromonas	0	0	0	0	0	0	0	0	0	0	0	0	0	0	0	0	0	0	0	0	0	0	0	9	0	0	0	0	0	0	0	0	0	0	0	10	0	16	0	0	0	0
J-2017_refine.031.Bac	Other	Patescibacteria	Gracilibacteria	BD1-5	UBA6164	UBA7396	unclassified_UBA7396	0	0	0	0	0	0	0	0	0	0	0	0	0	0	0	0	0	0	0	0	0	0	0	0	0	0	0	0	0	0	0	0	0	0	0	0	0	0	0	0	0	0
J-2018_refine.111.Bac	Other	Actinobacteriota	Acidimicrobiia	Microtrichales	Ilumatobacteraceae	UBA2093	unclassified_UBA2093	0	0	0	0	0	0	0	0	0	0	0	0	0	0	0	0	0	0	0	0	0	0	0	1	0	0	0	0	0	0	0	0	0	0	0	4	0	0	0	0	0	0
J-2018_refine.161.Bac	Other	Proteobacteria	Alphaproteobacteria	Rhodospirillales	Rhodospirillaceae	Haematospirillum	unclassified_Haematospirillum	0	1	0	0	0	0	0	0	0	0	0	0	0	0	0	0	0	0	1	0	0	0	0	0	0	0	0	0	0	0	0	0	0	0	0	0	0	1	0	0	0	0
J-2018_refine.350-0.Bac	Other	Actinobacteriota	Actinobacteria	Nanopelagicales	AcAMD-5	unclassified_AcAMD-5	unclassified_AcAMD-5	0	0	0	0	0	0	0	0	0	0	0	0	0	0	0	0	0	0	0	0	0	0	0	0	0	0	0	0	0	0	0	0	0	0	0	1	0	0	0	0	0	0
J-2018_refine.433.Bac	Other	Bacteroidota	Bacteroidia	Chitinophagales	Chitinophagaceae	Sediminibacterium	unclassified_Sediminibacterium	0	0	0	0	0	0	0	0	0	0	0	0	0	0	0	0	0	0	0	0	0	0	0	5	0	0	0	0	0	0	0	0	0	0	0	3	1	0	0	0	0	0
J-2018_refine.462-0.Bac	Other	Bacteroidota	Bacteroidia	Flavobacteriales	GCA-002722245	unclassified_GCA-002722245	unclassified_GCA-002722245	0	0	0	0	0	0	0	0	0	0	0	0	0	0	0	0	0	0	0	0	0	0	0	0	0	0	0	0	0	0	0	0	0	0	0	4	0	0	0	0	0	0
J-2018_refine.470.Bac	Other	Bacteroidota	Kapabacteria	Kapabacteriales	UBA961	UBA961	GCA_002293005.1	0	0	0	0	0	0	0	0	0	0	0	0	0	0	0	0	0	0	0	0	0	0	0	0	0	0	0	0	0	0	0	0	0	0	0	1	0	0	0	0	0	0
J-2018_refine.510.Bac	Other	Bacteroidota	Bacteroidia	Cytophagales	Spirosomaceae	Emticicia	unclassified_Emticicia	0	0	0	0	0	0	0	0	0	0	0	0	0	0	0	0	0	0	11	0	0	0	0	5	0	0	0	0	0	0	2	0	0	0	0	7	1	0	0	0	0	0
J-2018_refine.80.Bac	Other	Bacteroidota	Bacteroidia	NS11-12g	UBA955	unclassified_UBA955	unclassified_UBA955	0	0	0	0	0	0	0	0	0	0	0	0	0	0	0	0	0	0	1	0	0	0	0	0	0	0	0	0	0	0	0	0	0	0	0	4	0	0	0	0	0	0
JY-2018_refine.116-0.Bac	Other	Bdellovibrionota	Oligoflexia	Silvanigrellales	Silvanigrellaceae	unclassified_Silvanigrellaceae	unclassified_Silvanigrellaceae	0	0	0	0	0	0	0	0	0	0	0	0	0	0	0	0	0	0	0	0	0	0	0	0	0	0	0	0	0	0	0	0	0	0	0	0	0	0	0	0	0	0
JY-2018_refine.167-0.Bac	Other	Bacteroidota	Bacteroidia	NS11-12g	UBA955	unclassified_UBA955	unclassified_UBA955	0	0	0	0	0	0	0	0	0	0	0	0	0	0	0	0	0	0	1	0	0	0	0	0	0	0	0	0	0	0	0	0	0	0	0	4	0	0	0	0	0	0
JY-2018_refine.169.Bac	Other	Proteobacteria	Gammaproteobacteria	Betaproteobacteriales	Rhodocyclaceae	unclassified_Rhodocyclaceae	unclassified_Rhodocyclaceae	0	1	0	0	0	0	0	0	0	0	0	0	0	0	0	0	0	0	0	0	0	0	0	3	0	0	0	0	0	0	0	0	0	0	0	2	0	2	0	0	0	0
JY-2018_refine.346-0.Bac	Other	Bacteroidota	Bacteroidia	Flavobacteriales	Weeksellaceae	Cloacibacterium	unclassified_Cloacibacterium	0	0	0	0	0	0	0	0	0	0	0	0	0	0	0	0	0	0	1	0	0	0	0	1	0	0	0	0	0	0	0	0	0	0	0	1	1	0	0	0	0	0
JY-2018_refine.450.Bac	Other	Patescibacteria	Paceibacteria	UBA9983	Zambryskibacteraceae	unclassified_Zambryskibacteraceae	unclassified_Zambryskibacteraceae	0	0	0	0	0	0	0	0	0	0	0	0	0	0	0	0	0	0	0	0	0	0	0	0	0	0	0	0	0	0	0	0	0	0	0	0	0	0	0	0	0	0
JY-2018_refine.452-0.Bac	Other	Patescibacteria	ABY1	Uhrbacterales	2-12-FULL-60-25	21-14-all-47-17	unclassified_21-14-all-47-17	0	0	0	0	0	0	0	0	0	0	0	0	0	0	0	0	0	0	0	0	0	0	0	0	0	0	0	0	0	0	0	0	0	0	0	0	0	0	0	0	0	0
JY-2018_refine.456.Bac	Other	Patescibacteria	Paceibacteria	UBA9983	GCA-2401445	unclassified_GCA-2401445	unclassified_GCA-2401445	0	0	0	0	0	0	0	0	0	0	0	0	0	0	0	0	0	0	0	0	0	0	0	0	0	0	0	0	0	0	0	0	0	0	0	0	0	0	0	0	0	0
JY-2018_refine.457-0.Bac	Other	Patescibacteria	Doudnabacteria	UBA920	UBA920	unclassified_UBA920	unclassified_UBA920	0	0	0	0	0	0	0	0	0	0	0	0	0	0	0	0	0	0	0	0	0	0	0	0	0	0	0	0	0	0	0	0	0	0	0	1	0	0	0	0	0	0
JY-2018_refine.471-0.Bac	Other	Patescibacteria	Paceibacteria	UBA9983	Nomurabacteraceae	UBA4124	unclassified_UBA4124	0	0	0	0	0	0	0	0	0	0	0	0	0	0	0	0	0	0	5	0	0	0	0	0	0	0	0	0	0	0	0	0	0	0	0	0	0	0	0	0	0	0
N-2016_refine.132.Bac	Other	Proteobacteria	Alphaproteobacteria	Rhizobiales	Beijerinckiaceae	Methylocystis	unclassified_Methylocystis	0	0	0	0	0	0	0	0	0	0	0	0	0	0	0	0	0	0	0	0	0	0	0	0	0	0	0	0	0	0	0	0	0	0	0	2	0	0	0	0	0	0
N-2016_refine.450.Bac	Other	Bacteroidota	Bacteroidia	Chitinophagales	Chitinophagaceae	unclassified_Chitinophagaceae	unclassified_Chitinophagaceae	0	0	0	0	0	0	0	0	0	0	0	0	0	0	0	0	0	0	1	0	0	0	0	1	0	0	0	0	0	1	0	0	0	0	0	2	0	0	0	0	0	0
P-2016_refine.309.Bac	Other	Proteobacteria	Alphaproteobacteria	Caulobacterales	Caulobacteraceae	Asticcacaulis	unclassified_Asticcacaulis	0	0	0	0	0	0	0	0	0	0	0	0	0	0	0	0	0	0	2	0	0	0	0	0	0	0	0	0	0	0	0	0	0	0	0	3	2	2	0	0	0	0
P-2016_refine.340-0.Bac	Other	Bacteroidota	Bacteroidia	Flavobacteriales	Weeksellaceae	Cloacibacterium	GCA_002422665.1	0	0	0	0	0	0	0	0	0	0	0	0	0	0	0	0	0	0	1	0	0	0	0	2	0	0	0	0	0	0	0	0	0	0	0	5	3	0	0	0	0	0
SC-2017_refine.097.Bac	Other	Bacteroidota	Bacteroidia	Chitinophagales	Chitinophagaceae	BSSC1	unclassified_BSSC1	0	0	0	0	0	0	0	0	0	0	0	0	0	0	0	0	0	0	0	0	0	0	0	1	0	0	0	0	0	0	1	0	0	0	0	4	2	2	0	0	0	0
SC-2017_refine.186-0.Bac	Other	Actinobacteriota	Acidimicrobiia	Microtrichales	Ilumatobacteraceae	UBA2093	unclassified_UBA2093	0	0	0	0	0	0	0	0	0	0	0	0	0	0	0	0	0	0	0	0	0	0	0	1	0	0	0	0	0	0	0	0	0	0	0	3	0	0	0	0	0	0
SC-2017_refine.190.Bac	Other	Proteobacteria	Alphaproteobacteria	Holosporales	unclassified_Holosporales	unclassified_Holosporales	unclassified_Holosporales	0	0	0	0	0	0	0	0	0	0	0	0	0	0	0	0	0	0	0	0	0	0	0	0	0	0	0	0	0	0	0	0	0	0	0	0	0	0	0	0	0	0
SC-2017_refine.214.Bac	Other	Proteobacteria	Alphaproteobacteria	Acetobacterales	Acetobacteraceae	Ga0074136	unclassified_Ga0074136	0	0	0	0	0	0	0	0	0	0	0	0	0	0	0	0	0	0	0	0	0	0	0	0	0	0	0	0	0	0	0	0	0	0	0	1	0	3	0	0	0	0
SJ-2017_refine.077-0.Bac	Other	Patescibacteria	Saccharimonadia	Saccharimonadales	Saccharimonadaceae	UBA1547	unclassified_UBA1547	0	0	0	0	0	0	0	0	0	0	0	0	0	0	0	0	0	0	0	0	0	0	0	0	0	0	0	0	0	0	0	0	0	0	0	1	0	0	0	0	0	0
SJ-2017_refine.094-0.Bac	Other	Firmicutes	Bacilli	Exiguobacterales	Exiguobacteraceae	Exiguobacterium_A	Exiguobacterium_A sibiricum	0	0	0	0	0	0	0	0	0	0	0	0	0	0	0	0	0	0	0	0	0	0	0	1	0	0	0	0	0	0	0	0	0	0	0	4	0	0	0	0	0	1
SJ-2017_refine.100-0.Bac	Other	Bacteroidota	Bacteroidia	Flavobacteriales	Weeksellaceae	Chryseobacterium	Chryseobacterium aquaticum	0	0	0	0	0	0	0	0	0	0	0	0	0	0	0	0	0	0	1	0	0	0	0	1	0	0	0	0	0	0	0	0	0	0	0	3	2	0	0	0	0	0
SJ-2017_refine.357.Bac	Other	Actinobacteriota	Actinobacteria	Corynebacteriales	Corynebacteriaceae	Rhodococcus	unclassified_Rhodococcus	0	0	0	0	0	0	0	0	0	0	0	0	0	0	0	0	0	0	1	0	0	0	0	0	0	0	0	0	0	0	0	0	0	0	0	4	0	0	0	0	0	0
SJ-2017_refine.383.Bac	Other	Patescibacteria	Paceibacteria	UBA9983	Kaiserbacteraceae	C7867-001	unclassified_C7867-001	0	0	0	0	0	0	0	0	0	0	0	0	0	0	0	0	0	0	0	0	0	0	0	0	0	0	0	0	0	0	0	0	0	0	0	1	0	0	0	0	0	0
Y-2016_refine.443-0.Bac	Other	Bacteroidota	Bacteroidia	Chitinophagales	Chitinophagaceae	unclassified_Chitinophagaceae	unclassified_Chitinophagaceae	0	0	0	0	0	0	0	0	0	0	0	0	0	0	0	0	0	0	0	0	0	0	0	0	0	0	0	0	0	1	0	0	0	0	0	2	0	0	0	0	0	0
Y-2017_refine.124-0.Bac	Other	Acidobacteriota	Luteitaleia	Luteitaleales	UBA2999	12-FULL-67-14b	unclassified_12-FULL-67-14b	0	0	0	0	0	0	0	0	0	0	0	0	0	0	0	0	0	0	3	0	0	0	0	8	0	0	0	0	0	0	0	0	0	0	0	7	0	1	0	0	0	0
Y-2017_refine.177-0.Bac	Other	Actinobacteriota	Acidimicrobiia	Microtrichales	UBA8139	UBA8139	unclassified_UBA8139	0	0	0	0	0	0	0	0	0	0	0	0	0	0	0	0	0	0	0	0	0	0	0	1	0	0	0	0	0	0	0	0	0	0	0	1	0	0	0	0	0	0
Y-2017_refine.353-0.Bac	Other	Proteobacteria	Alphaproteobacteria	Caulobacterales	Caulobacteraceae	Brevundimonas	unclassified_Brevundimonas	0	0	0	0	0	0	0	0	0	0	0	0	0	0	0	0	0	0	8	0	0	0	0	1	0	0	0	0	0	0	0	0	0	0	0	3	1	2	0	0	0	0
Y-2017_refine.400-0.Bac	Other	Proteobacteria	Gammaproteobacteria	Betaproteobacteriales	Burkholderiaceae	Duganella	unclassified_Duganella	0	1	0	0	0	0	0	0	0	0	0	0	0	0	0	0	0	0	1	0	0	0	0	1	0	0	0	0	0	0	0	0	0	0	0	8	1	8	1	0	0	0
YA-2016_refine.037.Bac	Other	Proteobacteria	Gammaproteobacteria	Betaproteobacteriales	Burkholderiaceae	Limnobacter	unclassified_Limnobacter	0	0	0	0	0	0	0	0	0	0	0	0	0	0	0	0	0	0	0	0	0	0	0	0	0	0	0	0	0	0	0	0	0	0	0	5	0	3	0	0	0	0
YA-2016_refine.068-0.Bac	Other	Proteobacteria	Gammaproteobacteria	Pseudomonadales	Cellvibrionaceae	Cellvibrio	unclassified_Cellvibrio	0	0	0	0	0	0	0	0	0	0	0	0	0	0	0	0	0	0	0	0	0	0	0	1	0	0	0	0	0	0	0	0	0	0	0	2	0	0	0	0	0	0
YA-2016_refine.208.Bac	Other	Proteobacteria	Alphaproteobacteria	unclassified_Alphaproteobacteria	unclassified_Alphaproteobacteria	unclassified_Alphaproteobacteria	unclassified_Alphaproteobacteria	0	0	0	0	0	0	0	0	0	0	0	0	0	0	0	0	0	0	0	0	0	0	0	0	0	0	0	0	0	0	0	0	0	0	0	2	0	1	0	0	0	0
YA-2016_refine.233.Bac	Other	Bacteroidota	Bacteroidia	Flavobacteriales	Weeksellaceae	Cloacibacterium	unclassified_Cloacibacterium	0	0	0	0	0	0	0	0	0	0	0	0	0	0	0	0	0	0	1	0	0	0	0	0	0	0	0	0	0	0	0	0	0	0	0	4	1	0	0	0	0	0
AJ-2017_refine.003-0.Bac	River Group	Proteobacteria	Gammaproteobacteria	Enterobacterales	Enterobacteriaceae	Rahnella	Rahnella aquatilis_B	0	0	0	0	0	0	0	0	0	0	0	0	0	0	0	0	0	0	0	0	0	1	0	0	0	0	0	0	0	0	0	0	0	0	0	2	0	4	0	0	0	1
AJ-2017_refine.009-0.Bac	River Group	Bacteroidota	Bacteroidia	Flavobacteriales	Flavobacteriaceae	Flavobacterium	unclassified_Flavobacterium	0	0	0	0	0	0	0	0	0	0	0	0	0	0	0	0	0	0	1	0	0	0	0	0	0	0	0	0	0	0	0	0	0	0	0	4	0	0	0	0	0	0
AJ-2017_refine.021-0.Bac	River Group	Actinobacteriota	Actinobacteria	Actinomycetales	Microbacteriaceae	Rhodoluna	unclassified_Rhodoluna	0	0	0	0	0	0	0	0	0	0	0	0	0	0	0	0	0	0	0	0	0	0	0	0	0	0	0	0	0	0	0	0	0	0	0	0	0	0	0	0	0	0
AJ-2017_refine.026.Bac	River Group	Bacteroidota	Bacteroidia	Sphingobacteriales	Sphingobacteriaceae	Pedobacter	unclassified_Pedobacter	0	0	0	0	0	0	0	0	0	0	0	0	0	0	0	0	0	0	1	0	0	0	0	3	0	0	0	0	0	0	0	0	0	0	0	3	1	2	0	0	0	0
AJ-2017_refine.049.Bac	River Group	Proteobacteria	Gammaproteobacteria	Betaproteobacteriales	Burkholderiaceae	Polynucleobacter	unclassified_Polynucleobacter	0	0	0	0	0	0	0	0	0	0	0	0	0	0	0	0	0	0	0	0	0	0	0	2	0	0	0	0	0	0	0	0	0	0	0	3	0	1	0	0	0	0
AJ-2017_refine.055.Bac	River Group	Proteobacteria	Alphaproteobacteria	Sphingomonadales	Sphingomonadaceae	UBA1936	unclassified_UBA1936	0	0	0	0	0	0	0	0	0	0	0	0	0	0	1	0	0	1	3	0	0	0	0	0	0	0	0	0	0	0	0	0	0	0	0	4	0	0	0	0	0	0
AJ-2017_refine.062.Bac	River Group	Proteobacteria	Alphaproteobacteria	Rhodobacterales	Rhodobacteraceae	Pseudorhodobacter_A	unclassified_Pseudorhodobacter_A	0	0	0	0	0	0	0	0	0	0	0	0	0	0	0	0	0	0	0	0	0	0	0	1	0	0	0	0	0	0	0	0	0	0	0	4	0	0	0	0	0	0
AJ-2017_refine.064-0.Bac	River Group	Actinobacteriota	Actinobacteria	Actinomycetales	Microbacteriaceae	Rhodoluna	unclassified_Rhodoluna	0	0	0	0	0	0	0	0	0	0	0	0	0	0	0	0	0	0	0	0	0	0	0	0	0	0	0	0	0	0	0	0	0	0	0	0	0	0	0	0	0	0
AJ-2017_refine.080.Bac	River Group	Actinobacteriota	Actinobacteria	Actinomycetales	Microbacteriaceae	Rhodoluna	unclassified_Rhodoluna	0	0	0	0	0	0	0	0	0	0	0	0	0	0	0	0	0	0	0	0	0	0	0	0	0	0	0	0	0	0	0	0	0	0	0	1	0	0	0	0	0	0
AJ-2017_refine.087.Bac	River Group	Bacteroidota	Bacteroidia	Chitinophagales	Chitinophagaceae	UBA8137	unclassified_UBA8137	0	0	0	0	0	0	0	0	0	0	0	0	0	0	0	0	0	0	0	0	0	0	0	1	0	0	0	0	0	0	0	0	0	0	0	1	1	0	0	0	0	0
AJ-2017_refine.093.Bac	River Group	Bacteroidota	Bacteroidia	Flavobacteriales	Crocinitomicaceae	Fluviicola	unclassified_Fluviicola	0	1	0	0	0	0	0	0	0	0	0	0	0	0	0	0	0	0	0	0	0	0	0	1	0	0	0	0	0	0	0	0	0	0	0	3	0	0	0	0	0	0
AJ-2017_refine.103-0.Bac	River Group	Firmicutes	Bacilli_A	Paenibacillales	Paenibacillaceae	Paenibacillus	unclassified_Paenibacillus	0	1	0	0	0	0	0	0	0	0	0	0	0	0	0	0	0	0	0	0	0	0	0	0	0	0	0	0	0	0	0	0	0	0	0	8	1	6	0	0	0	0
AJ-2017_refine.104.Bac	River Group	Proteobacteria	Gammaproteobacteria	Pseudomonadales	Moraxellaceae	Acinetobacter	Acinetobacter harbinensis	0	0	0	0	0	0	0	0	0	0	0	0	0	0	0	0	0	0	0	0	0	0	0	0	0	0	0	0	0	0	0	0	0	0	0	2	0	2	1	1	0	0
AJ-2017_refine.113-0.Bac	River Group	Proteobacteria	Alphaproteobacteria	Rhodobacterales	Rhodobacteraceae	Tabrizicola	unclassified_Tabrizicola	0	0	0	0	0	0	0	0	0	0	0	0	0	0	0	0	0	0	0	0	0	0	0	1	0	0	0	0	0	0	0	0	0	0	0	4	1	0	0	0	0	0
AJ-2017_refine.121-0.Bac	River Group	Bacteroidota	Bacteroidia	Chitinophagales	Chitinophagaceae	UBA8137	unclassified_UBA8137	0	0	0	0	0	0	0	0	0	0	0	0	0	0	0	0	0	0	1	0	0	0	0	0	0	0	0	0	0	0	0	0	0	0	0	2	1	0	0	0	0	0
AJ-2017_refine.172.Bac	River Group	Proteobacteria	Gammaproteobacteria	Betaproteobacteriales	Burkholderiaceae	Limnohabitans	unclassified_Limnohabitans	0	0	0	0	0	0	0	0	0	0	0	0	0	0	0	0	0	0	0	0	0	0	0	2	0	0	0	0	0	0	0	0	0	0	0	4	0	1	0	0	0	0
AJ-2017_refine.180.Bac	River Group	Proteobacteria	Gammaproteobacteria	Betaproteobacteriales	Burkholderiaceae	UBA3064	unclassified_UBA3064	0	0	0	0	0	0	0	0	0	0	0	0	0	0	0	0	0	0	0	0	0	0	0	2	0	0	0	0	0	0	0	0	0	0	0	3	0	0	0	0	0	0
AJ-2017_refine.187-0.Bac	River Group	Proteobacteria	Gammaproteobacteria	Xanthomonadales	Xanthomonadaceae	Arenimonas	unclassified_Arenimonas	0	0	0	0	0	0	0	0	0	0	0	0	0	0	0	0	0	0	0	0	0	0	0	0	0	0	0	0	0	0	0	0	0	0	0	3	0	1	0	0	0	0
AJ-2017_refine.189.Bac	River Group	Proteobacteria	Alphaproteobacteria	Sphingomonadales	Sphingomonadaceae	Novosphingobium	unclassified_Novosphingobium	0	0	0	0	0	0	0	0	0	0	0	0	0	0	0	0	0	0	3	0	0	0	0	0	0	0	0	0	0	0	0	0	0	0	0	2	0	0	0	0	0	0
AJ-2017_refine.208.Bac	River Group	Actinobacteriota	Actinobacteria	Corynebacteriales	Corynebacteriaceae	Mycobacterium	unclassified_Mycobacterium	0	0	0	0	0	0	0	0	0	0	0	0	0	0	0	0	0	0	1	0	0	0	0	0	0	0	0	0	0	0	0	0	0	0	0	3	0	0	0	0	0	0
AJ-2017_refine.260-0.Bac	River Group	Actinobacteriota	Actinobacteria	Corynebacteriales	Corynebacteriaceae	Mycobacterium	unclassified_Mycobacterium	0	0	0	0	0	0	0	0	0	0	0	0	0	0	0	0	0	0	0	0	0	0	0	0	0	0	0	0	0	0	0	0	0	0	0	1	0	0	0	0	0	0
AJ-2017_refine.287-0.Bac	River Group	Proteobacteria	Gammaproteobacteria	Betaproteobacteriales	Methylophilaceae	Methylopumilus_A	unclassified_Methylopumilus_A	0	0	0	0	0	0	0	0	0	0	0	0	0	0	0	0	0	0	0	0	0	0	0	1	0	0	0	0	0	0	0	0	0	0	0	0	0	1	0	0	0	0
AJ-2017_refine.303.Bac	River Group	Proteobacteria	Alphaproteobacteria	Rhizobiales	Beijerinckiaceae	unclassified_Beijerinckiaceae	unclassified_Beijerinckiaceae	0	0	0	0	0	0	0	0	0	0	0	0	0	0	0	0	0	0	0	0	0	0	0	0	0	0	0	0	0	0	0	0	0	0	0	3	0	0	0	0	0	0
AJ-2017_refine.308.Bac	River Group	Actinobacteriota	Acidimicrobiia	Microtrichales	Ilumatobacteraceae	UBA3006	unclassified_UBA3006	0	0	0	0	0	0	0	0	0	0	0	0	0	0	0	0	0	0	0	0	0	0	0	1	0	0	0	0	0	0	0	0	0	0	0	2	0	0	0	0	0	0
AJ-2017_refine.312-0.Bac	River Group	Proteobacteria	Alphaproteobacteria	Rhizobiales	Beijerinckiaceae	unclassified_Beijerinckiaceae	unclassified_Beijerinckiaceae	0	0	0	0	0	0	0	0	0	0	0	0	0	0	0	0	0	0	0	0	0	0	0	0	0	0	0	0	0	0	0	0	0	0	0	5	0	4	0	0	0	0
AJ-2017_refine.336.Bac	River Group	Proteobacteria	Alphaproteobacteria	Rhizobiales	Beijerinckiaceae	unclassified_Beijerinckiaceae	unclassified_Beijerinckiaceae	0	0	0	0	0	0	0	0	0	0	0	0	0	0	0	0	0	0	0	0	0	0	0	0	0	0	0	0	0	0	0	0	0	0	0	6	0	4	0	0	0	0
CJ-2018_refine.017-0.Bac	River Group	Bacteroidota	Bacteroidia	Flavobacteriales	Flavobacteriaceae	Flavobacterium	unclassified_Flavobacterium	0	0	0	0	0	0	0	0	0	0	0	0	0	0	0	0	0	0	0	0	0	0	0	0	0	0	0	0	0	0	0	0	0	0	0	5	0	0	0	0	0	0
CJ-2018_refine.044-0.Bac	River Group	Actinobacteriota	Actinobacteria	Actinomycetales	Microbacteriaceae	Rhodoluna	unclassified_Rhodoluna	0	0	0	0	0	0	0	0	0	0	0	0	0	0	0	0	0	0	0	0	0	0	0	0	0	0	0	0	0	0	0	0	0	0	0	0	0	0	0	0	0	0
CJ-2018_refine.066-0.Bac	River Group	Bacteroidota	Bacteroidia	Flavobacteriales	Flavobacteriaceae	Flavobacterium	unclassified_Flavobacterium	0	0	0	0	0	0	0	0	0	0	0	0	0	0	0	0	0	0	0	0	0	0	0	0	0	0	0	0	0	0	0	0	0	0	0	3	1	0	0	0	0	0
CJ-2018_refine.079-0.Bac	River Group	Proteobacteria	Gammaproteobacteria	Betaproteobacteriales	Methylophilaceae	Methylopumilus	unclassified_Methylopumilus	0	0	0	0	0	0	0	0	0	0	0	0	0	0	0	0	0	0	0	0	0	0	0	0	0	0	0	0	0	0	0	0	0	0	0	0	0	0	0	0	0	0
CJ-2018_refine.095-0.Bac	River Group	Proteobacteria	Gammaproteobacteria	Betaproteobacteriales	Burkholderiaceae	Polynucleobacter	Polynucleobacter sp1	0	0	0	0	0	0	0	0	0	0	0	0	0	0	0	0	0	0	0	0	0	0	0	1	0	0	0	0	0	0	0	0	0	0	0	3	0	1	0	0	0	0
CJ-2018_refine.1.Bac	River Group	Proteobacteria	Alphaproteobacteria	Pelagibacterales	Pelagibacteraceae	Fonsibacter	Fonsibacter ubiquis	0	0	0	0	0	0	0	0	0	0	0	0	0	0	0	0	0	0	0	0	0	0	0	0	0	0	0	0	0	0	0	0	0	0	0	0	0	0	0	0	0	0
CJ-2018_refine.105-0.Bac	River Group	Proteobacteria	Gammaproteobacteria	Betaproteobacteriales	Burkholderiaceae	Limnohabitans	unclassified_Limnohabitans	0	0	0	0	0	0	0	0	0	0	0	0	0	0	0	0	0	0	0	0	0	0	0	1	0	0	0	0	0	0	0	0	0	0	0	3	0	0	0	0	0	0
CJ-2018_refine.111-0.Bac	River Group	Bacteroidota	Bacteroidia	Flavobacteriales	Crocinitomicaceae	UBA952	unclassified_UBA952	0	0	0	0	0	0	0	0	0	0	0	0	0	0	0	0	0	0	0	0	0	0	0	1	0	0	0	0	0	0	0	0	0	0	0	3	1	0	0	0	0	0
CJ-2018_refine.131-0.Bac	River Group	Proteobacteria	Gammaproteobacteria	Betaproteobacteriales	Rhodocyclaceae	unclassified_Rhodocyclaceae	unclassified_Rhodocyclaceae	0	0	0	0	0	0	0	0	0	0	0	0	0	0	0	0	0	0	0	0	0	0	0	1	0	0	0	0	0	0	0	0	0	0	0	2	0	3	0	0	0	0
CJ-2018_refine.186.Bac	River Group	Bacteroidota	Bacteroidia	Chitinophagales	Chitinophagaceae	unclassified_Chitinophagaceae	unclassified_Chitinophagaceae	0	0	0	0	0	0	0	0	0	0	0	0	0	0	0	0	0	0	1	0	0	0	0	0	0	0	0	0	0	0	0	0	0	0	0	1	1	0	0	0	0	0
CJ-2018_refine.191.Bac	River Group	Actinobacteriota	Actinobacteria	Nanopelagicales	Nanopelagicaceae	unclassified_Nanopelagicaceae	unclassified_Nanopelagicaceae	0	0	0	0	0	0	0	0	0	0	0	0	0	0	0	0	0	0	0	0	0	0	0	0	0	0	0	0	0	0	0	0	0	0	0	1	0	0	0	0	0	0
CJ-2018_refine.192-0.Bac	River Group	Bacteroidota	Bacteroidia	Flavobacteriales	Weeksellaceae	Cloacibacterium	unclassified_Cloacibacterium	0	0	0	0	0	0	0	0	0	0	0	0	0	0	0	0	0	0	0	0	0	0	0	0	0	0	0	0	0	0	0	0	0	0	0	5	0	0	0	0	0	0
CJ-2018_refine.20.Bac	River Group	Proteobacteria	Gammaproteobacteria	Enterobacterales	Alteromonadaceae	Rheinheimera_A	unclassified_Rheinheimera_A	0	0	0	0	0	0	0	0	0	0	0	0	0	0	0	0	0	0	0	0	0	0	0	0	0	0	0	0	1	0	0	0	0	0	0	1	0	6	0	0	0	0
CJ-2018_refine.238-0.Bac	River Group	Proteobacteria	Gammaproteobacteria	Steroidobacterales	Steroidobacteraceae	UBA964	unclassified_UBA964	0	0	0	0	0	0	0	0	0	0	0	0	0	0	0	0	0	0	1	0	0	0	0	0	0	0	0	0	0	0	0	0	0	0	0	2	1	0	0	0	0	0
CJ-2018_refine.287-0.Bac	River Group	Proteobacteria	Gammaproteobacteria	Betaproteobacteriales	Methylophilaceae	Methylopumilus_A	unclassified_Methylopumilus_A	0	0	0	0	0	0	0	0	0	0	0	0	0	0	0	0	0	0	0	0	0	0	0	2	0	0	0	0	0	0	0	0	0	0	0	1	0	1	0	0	0	0
CJ-2018_refine.3.Bac	River Group	Proteobacteria	Gammaproteobacteria	Betaproteobacteriales	Rhodocyclaceae	unclassified_Rhodocyclaceae	unclassified_Rhodocyclaceae	0	0	0	0	0	0	0	0	0	0	0	0	0	0	0	0	0	0	0	0	0	0	0	0	0	0	0	0	0	0	0	0	0	0	0	1	0	1	0	0	0	0
CJ-2018_refine.305.Bac	River Group	Proteobacteria	Gammaproteobacteria	Betaproteobacteriales	Burkholderiaceae	Polynucleobacter	unclassified_Polynucleobacter	0	0	0	0	0	0	0	0	0	0	0	0	0	0	0	0	0	0	0	0	0	0	0	2	0	0	0	0	0	0	0	0	0	0	0	2	0	0	0	0	0	0
CJ-2018_refine.31.Bac	River Group	Proteobacteria	Alphaproteobacteria	Sphingomonadales	Sphingomonadaceae	UBA1936	unclassified_UBA1936	0	0	0	0	0	0	0	0	0	0	0	0	0	0	0	0	0	0	2	0	0	0	0	0	0	0	0	0	0	0	0	0	0	0	0	3	0	0	0	0	0	0
CJ-2018_refine.311.Bac	River Group	Proteobacteria	Gammaproteobacteria	Betaproteobacteriales	Burkholderiaceae	unclassified_Burkholderiaceae	unclassified_Burkholderiaceae	0	0	0	0	0	0	0	0	0	0	0	0	0	0	0	0	0	0	0	0	0	0	0	2	0	0	0	0	0	0	0	0	0	0	0	6	0	3	0	0	0	0
CJ-2018_refine.331.Bac	River Group	Bacteroidota	Bacteroidia	NS11-12g	UBA955	unclassified_UBA955	unclassified_UBA955	0	0	0	0	0	0	0	0	0	0	0	0	0	0	0	0	0	0	1	0	0	0	0	0	0	0	0	0	0	0	0	0	0	0	0	2	0	0	0	0	0	0
CJ-2018_refine.335-0.Bac	River Group	Proteobacteria	Gammaproteobacteria	Betaproteobacteriales	Burkholderiaceae	unclassified_Burkholderiaceae	unclassified_Burkholderiaceae	0	0	0	0	0	0	0	0	0	0	0	0	0	0	0	0	0	0	0	0	0	0	0	1	0	0	0	0	0	0	0	0	0	0	0	4	0	2	0	0	0	0
CJ-2018_refine.337.Bac	River Group	Verrucomicrobiota	Verrucomicrobiae	Pedosphaerales	UBA9464	UBA6176	unclassified_UBA6176	0	0	0	0	0	0	0	0	0	0	0	0	0	0	0	0	0	0	0	0	0	0	0	0	0	0	0	0	0	0	0	0	0	0	0	3	0	1	0	0	0	0
CJ-2018_refine.339.Bac	River Group	Bacteroidota	Bacteroidia	Flavobacteriales	Crocinitomicaceae	Fluviicola	unclassified_Fluviicola	0	0	0	0	0	0	0	0	0	0	0	0	0	0	0	0	0	0	0	0	0	0	0	2	0	0	0	0	0	0	0	0	0	0	0	3	1	0	0	0	0	0
CJ-2018_refine.41.Bac	River Group	Actinobacteriota	Acidimicrobiia	Microtrichales	Ilumatobacteraceae	BACL27	unclassified_BACL27	0	0	0	0	0	0	0	0	0	0	0	0	0	0	0	0	0	0	0	0	0	0	0	0	0	0	0	0	0	0	0	0	0	0	0	3	0	0	0	0	0	0
CJ-2018_refine.54.Bac	River Group	Proteobacteria	Gammaproteobacteria	Betaproteobacteriales	Burkholderiaceae	Polynucleobacter	unclassified_Polynucleobacter	0	0	0	0	0	0	0	0	0	0	0	0	0	0	0	0	0	0	0	0	0	0	0	1	0	0	0	0	0	0	0	0	0	0	0	2	0	1	0	0	0	0
CJ-2018_refine.6.Bac	River Group	Proteobacteria	Gammaproteobacteria	Betaproteobacteriales	Rhodocyclaceae	unclassified_Rhodocyclaceae	unclassified_Rhodocyclaceae	0	0	0	0	0	0	0	0	0	0	0	0	0	0	0	0	0	0	0	0	0	0	0	1	0	0	0	0	0	0	0	0	0	0	0	4	0	3	0	0	0	0
CJ-2018_refine.63.Bac	River Group	Bacteroidota	Bacteroidia	Flavobacteriales	Crocinitomicaceae	UBA952	unclassified_UBA952	0	0	0	0	0	0	0	0	0	0	0	0	0	0	0	0	0	0	0	0	0	0	0	1	0	0	0	0	0	0	0	0	0	0	0	4	0	0	0	0	0	0
CJ-2018_refine.64.Bac	River Group	Chloroflexota	Ellin6529	CSP1-4	UBA10416	UBA10416	unclassified_UBA10416	0	0	0	0	0	0	0	0	0	0	0	0	0	0	0	0	0	0	0	0	0	0	0	0	0	0	0	0	0	0	0	0	0	0	0	1	0	0	0	0	0	0
CJ-2018_refine.80.Bac	River Group	Bacteroidota	Bacteroidia	NS11-12g	UBA955	UBA955	unclassified_UBA955	0	0	0	0	0	0	0	0	0	0	0	0	0	0	0	0	0	0	0	0	0	0	0	0	0	0	0	0	0	0	0	0	0	0	0	3	0	0	0	0	0	0
CJ-2018_refine.89.Bac	River Group	Bacteroidota	Bacteroidia	Chitinophagales	Chitinophagaceae	unclassified_Chitinophagaceae	unclassified_Chitinophagaceae	0	0	0	0	0	0	0	0	0	0	0	0	0	0	0	0	0	0	0	0	0	0	0	0	0	0	0	0	0	0	0	0	0	0	0	6	3	0	0	0	0	0
CJ-2018_refine.93.Bac	River Group	Proteobacteria	Gammaproteobacteria	Betaproteobacteriales	Rhodocyclaceae	unclassified_Rhodocyclaceae	unclassified_Rhodocyclaceae	0	0	0	0	0	0	0	0	0	0	0	0	0	0	0	0	0	0	0	0	0	0	0	0	0	0	0	0	0	0	0	0	0	0	0	2	0	3	0	0	0	0
G-2016_refine.008.Bac	River Group	Bacteroidota	Bacteroidia	Flavobacteriales	Flavobacteriaceae	Flavobacterium	unclassified_Flavobacterium	0	0	0	0	0	0	0	0	0	0	0	0	0	0	0	0	0	0	1	0	0	0	0	0	0	0	0	0	0	0	0	0	0	0	0	1	0	0	0	0	0	0
G-2016_refine.023.Bac	River Group	Bacteroidota	Bacteroidia	Flavobacteriales	Cryomorphaceae	Coccinistipes	unclassified_Coccinistipes	0	0	0	0	0	0	0	0	0	0	0	0	0	0	0	0	0	0	0	0	0	0	0	0	0	0	0	0	0	0	0	0	0	0	0	3	0	0	0	0	0	0
G-2016_refine.025-0.Bac	River Group	Bdellovibrionota	Bacteriovoracia	Bacteriovoracales	Bacteriovoracaceae	UBA4096	unclassified_UBA4096	0	0	0	0	0	0	0	0	0	0	0	0	0	0	0	0	0	0	0	0	0	0	0	0	0	0	0	0	0	0	0	0	0	0	0	2	0	0	0	0	0	0
G-2016_refine.027.Bac	River Group	Bacteroidota	Bacteroidia	AKYH767	unclassified_AKYH767	unclassified_AKYH767	unclassified_AKYH767	0	0	0	0	0	0	0	0	0	0	0	0	0	0	0	0	0	0	0	0	0	0	0	0	0	0	0	0	0	0	1	0	0	0	0	3	1	0	0	0	0	0
G-2016_refine.034.Bac	River Group	Proteobacteria	Alphaproteobacteria	Rhodobacterales	Rhodobacteraceae	Tabrizicola	unclassified_Tabrizicola	0	0	0	0	0	0	0	0	0	0	0	0	0	0	0	0	0	0	0	0	0	0	0	0	0	0	0	0	0	0	0	0	0	0	0	6	0	0	0	0	0	0
G-2016_refine.037-0.Bac	River Group	Proteobacteria	Gammaproteobacteria	Betaproteobacteriales	Burkholderiaceae	UBA3064	unclassified_UBA3064	0	0	0	0	0	0	0	0	0	0	0	0	0	0	0	0	0	0	0	0	0	0	0	2	0	0	0	0	0	0	0	0	0	0	0	3	0	0	0	0	0	0
G-2016_refine.041.Bac	River Group	Proteobacteria	Gammaproteobacteria	Betaproteobacteriales	Methylophilaceae	Methylopumilus_A	unclassified_Methylopumilus_A	0	0	0	0	0	0	0	0	0	0	0	0	0	0	0	0	0	0	0	0	0	0	0	1	0	0	0	0	0	0	0	0	0	0	0	1	0	1	0	0	0	0
G-2016_refine.062.Bac	River Group	Bacteroidota	Bacteroidia	Flavobacteriales	Flavobacteriaceae	Flavobacterium	unclassified_Flavobacterium	0	0	0	0	0	0	0	0	0	0	0	0	0	0	0	0	0	0	0	0	0	0	0	1	0	0	0	0	0	0	0	0	0	0	0	2	1	0	0	0	0	0
G-2016_refine.078.Bac	River Group	Bacteroidota	Bacteroidia	Cytophagales	Cyclobacteriaceae	Algoriphagus	unclassified_Algoriphagus	0	0	0	0	0	0	0	0	0	0	0	0	0	0	0	0	0	0	0	0	0	0	0	1	0	0	0	0	0	0	0	0	0	0	0	5	0	0	0	0	0	0
G-2016_refine.091.Bac	River Group	Bacteroidota	Bacteroidia	Chitinophagales	Saprospiraceae	UBA10441	unclassified_UBA10441	0	0	0	0	0	0	0	0	0	0	0	0	0	0	0	0	0	0	0	0	0	0	0	1	0	0	0	0	0	0	0	0	0	0	0	4	1	0	0	0	0	0
G-2016_refine.098.Bac	River Group	Proteobacteria	Alphaproteobacteria	Rhodobacterales	Rhodobacteraceae	Pseudorhodobacter_A	unclassified_Pseudorhodobacter_A	0	0	0	0	0	0	0	0	0	0	0	0	0	0	0	0	0	0	0	0	0	0	0	0	0	0	0	0	0	0	0	0	0	0	0	2	0	0	0	0	0	0
G-2016_refine.119.Bac	River Group	Bacteroidota	Bacteroidia	Chitinophagales	Saprospiraceae	UBA10441	unclassified_UBA10441	0	0	0	0	0	0	0	0	0	0	0	0	0	0	0	0	0	0	0	0	0	0	0	1	0	0	0	0	0	0	0	0	0	0	0	2	1	0	0	0	0	0
G-2016_refine.124.Bac	River Group	Planctomycetota	Planctomycetes	Pirellulales	Pirellulaceae	Pirellula	unclassified_Pirellula	0	0	0	0	0	0	0	0	0	0	0	0	0	0	0	0	0	0	0	0	0	0	0	0	0	0	0	0	0	0	0	0	0	0	0	3	1	3	0	0	0	0
G-2016_refine.125.Bac	River Group	Bacteroidota	Bacteroidia	AKYH767	b-17BO	UBA2475	unclassified_UBA2475	0	0	0	0	0	0	0	0	0	0	0	0	0	0	0	0	0	0	0	0	0	0	0	0	0	0	0	0	0	0	0	0	0	0	0	8	0	0	0	0	0	0
G-2016_refine.144.Bac	River Group	Bacteroidota	Bacteroidia	NS11-12g	UKL13-3	UBA6183	unclassified_UBA6183	0	0	0	0	0	0	0	0	0	0	0	0	0	0	0	0	0	0	2	0	0	0	0	0	0	0	0	0	0	0	0	0	0	0	0	4	1	0	0	0	0	0
G-2016_refine.153.Bac	River Group	Proteobacteria	Alphaproteobacteria	Sphingomonadales	Sphingomonadaceae	UBA1936	unclassified_UBA1936	0	0	0	0	0	0	0	0	0	0	0	0	0	0	0	0	0	0	3	0	0	0	0	0	0	0	0	0	0	0	0	0	0	0	0	3	0	0	0	0	0	0
G-2016_refine.157-0.Bac	River Group	Bacteroidota	Bacteroidia	Chitinophagales	Saprospiraceae	unclassified_Saprospiraceae	unclassified_Saprospiraceae	0	0	0	0	0	0	0	0	0	0	0	0	0	0	0	0	0	0	0	0	0	0	0	0	0	0	0	0	0	0	0	0	0	0	0	5	1	0	0	0	0	0
G-2016_refine.158-0.Bac	River Group	Proteobacteria	Alphaproteobacteria	Caulobacterales	Hyphomonadaceae	Aquidulcibacter	unclassified_Aquidulcibacter	0	0	0	0	0	0	0	0	0	0	0	0	0	0	0	0	0	0	1	0	0	0	0	0	0	0	0	0	0	0	0	0	0	0	0	3	1	0	0	0	0	0
G-2016_refine.160.Bac	River Group	Proteobacteria	Gammaproteobacteria	Betaproteobacteriales	Methylophilaceae	Methylotenera	unclassified_Methylotenera	0	0	0	0	0	0	0	0	0	0	0	0	0	0	0	0	0	0	0	0	0	0	0	1	0	0	0	0	0	0	0	0	0	0	0	3	0	1	0	0	0	0
G-2016_refine.165-0.Bac	River Group	Proteobacteria	Gammaproteobacteria	Betaproteobacteriales	Burkholderiaceae	unclassified_Burkholderiaceae	unclassified_Burkholderiaceae	0	0	0	0	0	0	0	0	0	0	0	0	0	0	0	0	0	0	0	0	0	0	0	2	0	0	0	0	0	0	0	0	0	0	0	4	0	2	0	0	0	0
G-2016_refine.192.Bac	River Group	Actinobacteriota	Actinobacteria	Actinomycetales	Microbacteriaceae	Rhodoluna	unclassified_Rhodoluna	0	0	0	0	0	0	0	0	0	0	0	0	0	0	0	0	0	0	0	0	0	0	0	0	0	0	0	0	0	0	0	0	0	0	0	1	0	0	0	0	0	0
G-2016_refine.227-0.Bac	River Group	Bacteroidota	Bacteroidia	NS11-12g	UBA955	UBA955	unclassified_UBA955	0	0	0	0	0	0	0	0	0	0	0	0	0	0	0	0	0	0	0	0	0	0	0	0	0	0	0	0	0	0	0	0	0	0	0	2	0	0	0	0	0	0
G-2016_refine.294-0.Bac	River Group	Proteobacteria	Alphaproteobacteria	Acetobacterales	Acetobacteraceae	Ga0074136	unclassified_Ga0074136	0	0	0	0	0	0	0	0	0	0	0	0	0	0	0	0	0	0	0	0	0	0	0	0	0	0	0	0	0	0	0	0	0	0	0	4	0	0	0	0	0	0
G-2016_refine.300.Bac	River Group	Bacteroidota	Kapabacteria	Kapabacteriales	UBA961	UBA961	GCA_002293005.1	0	0	0	0	0	0	0	0	0	0	0	0	0	0	0	0	0	0	0	0	0	0	0	0	0	0	0	0	0	0	0	0	0	0	0	3	0	0	0	0	0	0
G-2016_refine.301.Bac	River Group	Bacteroidota	Bacteroidia	Chitinophagales	Chitinophagaceae	unclassified_Chitinophagaceae	unclassified_Chitinophagaceae	0	0	0	0	0	0	0	0	0	0	0	0	0	0	0	0	0	0	0	0	0	0	0	1	0	0	0	0	0	1	0	0	0	0	0	2	0	0	0	0	0	0
G-2016_refine.333-0.Bac	River Group	Bacteroidota	Bacteroidia	Cytophagales	Spirosomaceae	unclassified_Spirosomaceae	unclassified_Spirosomaceae	0	0	0	0	0	0	0	0	0	0	0	0	0	0	0	0	0	0	0	0	0	0	0	1	0	0	0	0	0	0	0	0	0	0	0	5	1	0	0	0	0	0
IW-2016_refine.012.Bac	River Group	Bacteroidota	Bacteroidia	NS11-12g	UBA955	UBA955	unclassified_UBA955	0	0	0	0	0	0	0	0	0	0	0	0	0	0	0	0	0	0	0	0	0	0	0	0	0	0	0	0	0	0	0	0	0	0	0	3	0	0	0	0	0	0
IW-2016_refine.018.Bac	River Group	Bacteroidota	Bacteroidia	Flavobacteriales	Flavobacteriaceae	Flavobacterium	unclassified_Flavobacterium	0	0	0	0	0	0	0	0	0	0	0	0	0	0	0	0	0	0	1	0	0	0	0	0	0	0	0	0	0	0	0	0	0	0	0	3	0	0	0	0	0	0
IW-2016_refine.020.Bac	River Group	Bacteroidota	Bacteroidia	NS11-12g	UBA955	UBA955	unclassified_UBA955	0	0	0	0	0	0	0	0	0	0	0	0	0	0	0	0	0	0	0	0	0	0	0	0	0	0	0	0	0	0	0	0	0	0	0	4	0	0	0	0	0	0
IW-2016_refine.045-0.Bac	River Group	Bacteroidota	Bacteroidia	Flavobacteriales	Crocinitomicaceae	UBA952	unclassified_UBA952	0	0	0	0	0	0	0	0	0	0	0	0	0	0	0	0	0	0	0	0	0	0	0	1	0	0	0	0	0	0	0	0	0	0	0	1	1	0	0	0	0	0
IW-2016_refine.047.Bac	River Group	Proteobacteria	Alphaproteobacteria	Sphingomonadales	Sphingomonadaceae	UBA1936	unclassified_UBA1936	0	0	0	0	0	0	0	0	0	0	0	0	0	0	0	0	0	0	5	0	0	0	0	0	0	0	0	0	0	0	0	0	0	0	0	5	0	0	0	0	0	0
IW-2016_refine.050.Bac	River Group	Proteobacteria	Gammaproteobacteria	Betaproteobacteriales	Burkholderiaceae	Polynucleobacter	unclassified_Polynucleobacter	0	0	0	0	0	0	0	0	0	0	0	0	0	0	0	0	0	0	0	0	0	0	0	2	0	0	0	0	0	0	0	0	0	0	0	2	0	1	0	0	0	0
IW-2016_refine.053-0.Bac	River Group	Actinobacteriota	Acidimicrobiia	Microtrichales	Ilumatobacteraceae	UBA2093	unclassified_UBA2093	0	0	0	0	0	0	0	0	0	0	0	0	0	0	0	0	0	0	0	0	0	0	0	1	0	0	0	0	0	0	0	0	0	0	0	2	0	0	0	0	0	0
IW-2016_refine.063.Bac	River Group	Bacteroidota	Bacteroidia	Chitinophagales	Chitinophagaceae	unclassified_Chitinophagaceae	unclassified_Chitinophagaceae	0	0	0	0	0	0	0	0	0	0	0	0	0	0	0	0	0	0	0	0	0	0	0	0	0	0	0	0	0	0	0	0	0	0	0	12	2	0	0	0	0	0
IW-2016_refine.074-0.Bac	River Group	Proteobacteria	Gammaproteobacteria	Betaproteobacteriales	Burkholderiaceae	UBA3064	unclassified_UBA3064	0	0	0	0	0	0	0	0	0	0	0	0	0	0	0	0	0	0	0	0	0	0	0	1	0	0	0	0	0	0	0	0	0	0	0	2	0	1	0	0	0	0
IW-2016_refine.077-0.Bac	River Group	Proteobacteria	Alphaproteobacteria	Sphingomonadales	Sphingomonadaceae	Novosphingobium	unclassified_Novosphingobium	0	0	0	0	0	0	0	0	0	0	0	0	0	0	0	0	0	0	1	0	0	0	0	1	0	0	0	0	0	0	0	0	0	0	0	1	0	0	0	0	0	0
IW-2016_refine.081.Bac	River Group	Proteobacteria	Gammaproteobacteria	Betaproteobacteriales	Burkholderiaceae	unclassified_Burkholderiaceae	unclassified_Burkholderiaceae	0	0	0	0	0	0	0	0	0	0	0	0	0	0	0	0	0	0	0	0	0	0	0	1	0	0	0	0	0	0	0	0	0	0	0	4	1	1	0	0	0	0
IW-2016_refine.082.Bac	River Group	Proteobacteria	Alphaproteobacteria	Rhodobacterales	Rhodobacteraceae	Tabrizicola	unclassified_Tabrizicola	0	0	0	0	0	0	0	0	0	0	0	0	0	0	0	0	0	0	0	0	0	0	0	0	0	0	0	0	0	0	0	0	0	0	0	5	1	0	0	0	0	0
IW-2016_refine.089-0.Bac	River Group	Bacteroidota	Bacteroidia	Cytophagales	Spirosomaceae	UBA6715	unclassified_UBA6715	0	0	0	0	0	0	0	0	0	0	0	0	0	0	0	0	0	0	0	0	0	0	0	1	0	0	0	0	0	0	0	0	0	0	0	2	0	0	0	0	0	0
IW-2016_refine.097.Bac	River Group	Proteobacteria	Gammaproteobacteria	Betaproteobacteriales	Burkholderiaceae	Polynucleobacter	Polynucleobacter sp1	0	0	0	0	0	0	0	0	0	0	0	0	0	0	0	0	0	0	0	0	0	0	0	2	0	0	0	0	0	0	0	0	0	0	0	4	0	1	0	0	0	0
IW-2016_refine.100.Bac	River Group	Bacteroidota	Bacteroidia	Flavobacteriales	Crocinitomicaceae	UBA952	unclassified_UBA952	0	0	0	0	0	0	0	0	0	0	0	0	0	0	0	0	0	0	0	0	0	0	0	1	0	0	0	0	0	0	0	0	0	0	0	5	1	0	0	0	0	0
IW-2016_refine.109-0.Bac	River Group	Bacteroidota	Bacteroidia	Flavobacteriales	Crocinitomicaceae	UBA952	unclassified_UBA952	0	0	0	0	0	0	0	0	0	0	0	0	0	0	0	0	0	0	0	0	0	0	0	1	0	0	0	0	0	0	0	0	0	0	0	1	1	0	0	0	0	0
IW-2016_refine.113.Bac	River Group	Proteobacteria	Gammaproteobacteria	Betaproteobacteriales	Methylophilaceae	Methylopumilus_A	unclassified_Methylopumilus_A	0	0	0	0	0	0	0	0	0	0	0	0	0	0	0	0	0	0	0	0	0	0	0	1	0	0	0	0	0	0	0	0	0	0	0	1	0	1	0	0	0	0
IW-2016_refine.117.Bac	River Group	Proteobacteria	Gammaproteobacteria	Steroidobacterales	Steroidobacteraceae	unclassified_Steroidobacteraceae	unclassified_Steroidobacteraceae	0	0	0	0	0	0	0	0	0	0	0	0	0	0	0	0	0	0	1	0	0	0	0	1	0	0	0	0	0	0	0	0	0	0	0	1	0	1	0	0	0	0
IW-2016_refine.121.Bac	River Group	Bacteroidota	Bacteroidia	Flavobacteriales	Crocinitomicaceae	UBA952	unclassified_UBA952	0	0	0	0	0	0	0	0	0	0	0	0	0	0	0	0	0	0	0	0	0	0	0	1	0	0	0	0	0	0	0	0	0	0	0	4	1	0	0	0	0	0
IW-2016_refine.123.Bac	River Group	Proteobacteria	Alphaproteobacteria	Pelagibacterales	Pelagibacteraceae	Fonsibacter	Fonsibacter ubiquis	0	0	0	0	0	0	0	0	0	0	0	0	0	0	0	0	0	0	0	0	0	0	0	0	0	0	0	0	0	0	0	0	0	0	0	1	0	0	0	0	0	0
IW-2016_refine.136-0.Bac	River Group	Proteobacteria	Gammaproteobacteria	Betaproteobacteriales	Burkholderiaceae	Limnohabitans	unclassified_Limnohabitans	0	0	0	0	0	0	0	0	0	0	0	0	0	0	0	0	0	0	0	0	0	0	0	2	0	0	0	0	0	0	0	0	0	0	0	3	0	0	0	0	0	0
IW-2016_refine.138.Bac	River Group	Proteobacteria	Alphaproteobacteria	Rhodobacterales	Rhodobacteraceae	Tabrizicola	unclassified_Tabrizicola	0	0	0	0	0	0	0	0	0	0	0	0	0	0	0	0	0	0	0	0	0	0	0	0	0	0	0	0	0	0	0	0	0	0	0	4	1	0	0	0	0	0
IW-2016_refine.148.Bac	River Group	Proteobacteria	Gammaproteobacteria	Xanthomonadales	Xanthomonadaceae	Arenimonas	unclassified_Arenimonas	0	0	0	0	0	0	0	0	0	0	0	0	0	0	0	0	0	0	0	0	0	0	0	0	0	0	0	0	0	0	0	0	0	0	0	3	0	1	0	0	0	0
IW-2016_refine.156-0.Bac	River Group	Bacteroidota	Bacteroidia	Flavobacteriales	Flavobacteriaceae	Flavobacterium	unclassified_Flavobacterium	0	0	0	0	0	0	0	0	0	0	0	0	0	0	0	0	0	0	0	0	0	0	0	0	0	0	0	0	0	0	0	0	0	0	0	2	1	0	0	0	0	0
IW-2016_refine.164.Bac	River Group	Proteobacteria	Gammaproteobacteria	Steroidobacterales	Steroidobacteraceae	UBA964	unclassified_UBA964	0	0	0	0	0	0	0	0	0	0	0	0	0	0	0	0	0	0	1	0	0	0	0	0	0	0	0	0	0	0	0	0	0	0	0	2	1	0	0	0	0	0
IW-2016_refine.166-0.Bac	River Group	Actinobacteriota	Actinobacteria	Actinomycetales	Microbacteriaceae	Rhodoluna	unclassified_Rhodoluna	0	0	0	0	0	0	0	0	0	0	0	0	0	0	0	0	0	0	0	0	0	0	0	0	0	0	0	0	0	0	0	0	0	0	0	1	0	0	0	0	0	0
IW-2016_refine.167.Bac	River Group	Actinobacteriota	Acidimicrobiia	Microtrichales	Ilumatobacteraceae	UBA8979	unclassified_UBA8979	0	1	0	0	0	0	0	0	0	0	0	0	0	0	0	0	0	0	0	0	0	0	0	12	0	0	0	0	0	0	0	0	0	0	0	14	0	0	0	0	0	0
IW-2016_refine.176-0.Bac	River Group	Bacteroidota	Bacteroidia	Flavobacteriales	Crocinitomicaceae	UBA952	unclassified_UBA952	0	0	0	0	0	0	0	0	0	0	0	0	0	0	0	0	0	0	0	0	0	0	0	1	0	0	0	0	0	0	0	0	0	0	0	3	0	0	0	0	0	0
IW-2016_refine.178.Bac	River Group	Proteobacteria	Alphaproteobacteria	Sphingomonadales	Sphingomonadaceae	Ga0077559	unclassified_Ga0077559	0	0	0	0	0	0	0	0	0	0	0	0	0	0	0	0	0	0	1	0	0	0	0	2	0	0	0	0	0	0	0	0	0	0	0	2	0	0	0	0	0	0
IW-2016_refine.179.Bac	River Group	Bacteroidota	Bacteroidia	AKYH767	b-17BO	unclassified_b-17BO	unclassified_b-17BO	0	0	0	0	0	0	0	0	0	0	0	0	0	0	0	0	0	0	0	0	0	0	0	0	0	0	0	0	0	0	0	0	0	0	0	2	1	0	0	0	0	0
IW-2016_refine.181.Bac	River Group	Bacteroidota	Bacteroidia	Flavobacteriales	Cryomorphaceae	unclassified_Cryomorphaceae	unclassified_Cryomorphaceae	0	0	0	0	0	0	0	0	0	0	0	0	0	0	0	0	0	0	0	0	0	0	0	0	0	0	0	0	0	0	0	0	0	0	0	4	1	0	0	0	0	0
IW-2016_refine.188-0.Bac	River Group	Bacteroidota	Bacteroidia	Flavobacteriales	Crocinitomicaceae	UBA952	unclassified_UBA952	0	0	0	0	0	0	0	0	0	0	0	0	0	0	0	0	0	0	0	0	0	0	0	0	0	0	0	0	0	0	0	0	0	0	0	1	0	0	0	0	0	0
IW-2016_refine.194.Bac	River Group	Bacteroidota	Bacteroidia	UBA7662	UBA7662	unclassified_UBA7662	unclassified_UBA7662	0	0	0	0	0	0	0	0	0	0	0	0	0	0	0	0	0	0	0	0	0	0	0	0	0	0	0	0	0	0	0	0	0	0	0	2	0	0	0	0	0	0
IW-2016_refine.199-0.Bac	River Group	Verrucomicrobiota	Verrucomicrobiae	Pedosphaerales	UBA9464	UBA9464	unclassified_UBA9464	0	0	0	0	0	0	0	0	0	0	0	0	0	0	0	0	0	0	0	0	0	0	0	0	0	0	0	0	0	0	0	0	0	0	0	2	0	1	0	0	0	0
IW-2016_refine.216.Bac	River Group	Bacteroidota	Bacteroidia	Chitinophagales	Saprospiraceae	unclassified_Saprospiraceae	unclassified_Saprospiraceae	0	0	0	0	0	0	0	0	0	0	0	0	0	0	0	0	0	0	0	0	0	0	0	0	0	0	0	0	0	0	0	0	0	0	0	4	0	0	0	0	0	0
IW-2016_refine.225.Bac	River Group	Bacteroidota	Bacteroidia	Chitinophagales	Saprospiraceae	Haliscomenobacter	unclassified_Haliscomenobacter	0	0	0	0	0	0	0	0	0	0	0	0	0	0	0	0	0	0	1	0	0	0	0	1	0	0	0	0	0	0	0	0	0	0	0	4	2	0	0	0	0	0
IW-2016_refine.226.Bac	River Group	Bacteroidota	Bacteroidia	Sphingobacteriales	unclassified_Sphingobacteriales	unclassified_Sphingobacteriales	unclassified_Sphingobacteriales	0	0	0	0	0	0	0	0	0	0	0	0	0	0	0	0	0	0	0	0	0	0	0	0	0	0	0	0	0	0	0	0	0	0	0	5	1	0	0	0	0	0
IW-2016_refine.233-0.Bac	River Group	Proteobacteria	Gammaproteobacteria	Betaproteobacteriales	Burkholderiaceae	Rhodoferax	unclassified_Rhodoferax	0	0	0	0	0	0	0	0	0	0	0	0	0	0	0	0	0	0	0	0	0	0	0	0	0	0	0	0	0	0	0	0	0	0	0	3	0	1	0	0	0	0
IW-2016_refine.252-0.Bac	River Group	Bacteroidota	Bacteroidia	NS11-12g	UBA955	unclassified_UBA955	unclassified_UBA955	0	0	0	0	0	0	0	0	0	0	0	0	0	0	0	0	0	0	1	0	0	0	0	0	0	0	0	0	0	0	0	0	0	0	0	2	0	0	0	0	0	0
IW-2016_refine.256.Bac	River Group	Bacteroidota	Bacteroidia	Flavobacteriales	Flavobacteriaceae	Flavobacterium	unclassified_Flavobacterium	0	0	0	0	0	0	0	0	0	0	0	0	0	0	0	0	0	0	0	0	0	0	0	1	0	0	0	0	0	0	0	0	0	0	0	3	0	0	0	0	0	0
IW-2016_refine.275.Bac	River Group	Bacteroidota	Bacteroidia	Chitinophagales	Saprospiraceae	UBA10441	unclassified_UBA10441	0	0	0	0	0	0	0	0	0	0	0	0	0	0	0	0	0	0	0	0	0	0	0	1	0	0	0	0	0	0	0	0	0	0	0	3	1	0	0	0	0	0
IW-2016_refine.282.Bac	River Group	Verrucomicrobiota	Verrucomicrobiae	Opitutales	Opitutaceae	Opitutus	unclassified_Opitutus	0	0	0	0	0	0	0	0	0	0	0	0	0	0	0	0	0	0	0	0	0	0	0	2	0	0	0	0	0	0	0	0	0	0	0	4	1	2	0	0	0	0
IW-2016_refine.283-0.Bac	River Group	Proteobacteria	Gammaproteobacteria	Steroidobacterales	Steroidobacteraceae	UBA964	unclassified_UBA964	0	0	0	0	0	0	0	0	0	0	0	0	0	0	0	0	0	0	1	0	0	0	0	0	0	0	0	0	0	0	0	0	0	0	0	2	1	0	0	0	0	0
IW-2016_refine.291.Bac	River Group	Bacteroidota	Bacteroidia	Chitinophagales	Chitinophagaceae	unclassified_Chitinophagaceae	unclassified_Chitinophagaceae	0	0	0	0	0	0	0	0	0	0	0	0	0	0	0	0	0	0	0	0	0	0	0	0	0	0	0	0	0	0	0	0	0	0	0	2	1	0	0	0	0	0
IW-2016_refine.301.Bac	River Group	Bacteroidota	Bacteroidia	Flavobacteriales	GCA-002722245	unclassified_GCA-002722245	unclassified_GCA-002722245	0	0	0	0	0	0	0	0	0	0	0	0	0	0	0	0	0	0	0	0	0	0	0	0	0	0	0	0	0	0	0	0	0	0	0	8	0	0	0	0	0	0
IW-2016_refine.304-0.Bac	River Group	Proteobacteria	Alphaproteobacteria	Rhodobacterales	Rhodobacteraceae	Pseudorhodobacter_A	unclassified_Pseudorhodobacter_A	0	0	0	0	0	0	0	0	0	0	0	0	0	0	0	0	0	0	0	0	0	0	0	0	0	0	0	0	0	0	0	0	0	0	0	2	0	0	0	0	0	0
IW-2016_refine.307.Bac	River Group	Actinobacteriota	Actinobacteria	Nanopelagicales	AcAMD-5	unclassified_AcAMD-5	unclassified_AcAMD-5	0	0	0	0	0	0	0	0	0	0	0	0	0	0	0	0	0	0	0	0	0	0	0	0	0	0	0	0	0	0	0	0	0	0	0	1	0	0	0	0	0	0
IW-2016_refine.318-0.Bac	River Group	Bacteroidota	Bacteroidia	Flavobacteriales	Crocinitomicaceae	unclassified_Crocinitomicaceae	unclassified_Crocinitomicaceae	0	0	0	0	0	0	0	0	0	0	0	0	0	0	0	0	0	0	0	0	0	0	0	1	0	0	0	0	0	0	0	0	0	0	0	3	0	0	0	0	0	0
IW-2016_refine.326.Bac	River Group	Proteobacteria	Gammaproteobacteria	Betaproteobacteriales	Burkholderiaceae	Polaromonas	unclassified_Polaromonas	0	0	0	0	0	0	0	0	0	0	0	0	0	0	0	0	0	0	0	0	0	0	0	3	0	0	0	0	0	0	0	0	0	0	0	2	0	1	0	0	0	0
IW-2016_refine.328.Bac	River Group	Actinobacteriota	Actinobacteria	Nanopelagicales	Nanopelagicaceae	IMCC26077	unclassified_IMCC26077	0	0	0	0	0	0	0	0	0	0	0	0	0	0	0	0	0	0	0	0	0	0	0	0	0	0	0	0	0	0	0	0	0	0	0	1	0	0	0	0	0	0
IW-2016_refine.331-0.Bac	River Group	Proteobacteria	Alphaproteobacteria	Rickettsiales	UBA1997	unclassified_UBA1997	unclassified_UBA1997	0	0	0	0	0	0	0	0	0	0	0	0	0	0	0	0	0	0	0	0	0	0	0	0	0	0	0	0	0	0	0	0	0	0	0	4	0	0	0	0	0	0
IW-2016_refine.333-0.Bac	River Group	Actinobacteriota	Acidimicrobiia	IMCC26256	IMCC26256	IMCC26256	unclassified_IMCC26256	0	0	0	0	0	0	0	0	0	0	0	0	0	0	0	0	0	0	0	0	0	0	0	1	0	0	0	0	0	0	0	0	0	0	0	2	0	0	0	0	0	0
IW-2016_refine.335.Bac	River Group	Bacteroidota	Bacteroidia	Chitinophagales	Chitinophagaceae	unclassified_Chitinophagaceae	unclassified_Chitinophagaceae	0	0	0	0	0	0	0	0	0	0	0	0	0	0	0	0	0	0	0	0	0	0	0	0	0	0	0	0	0	5	0	0	0	0	0	4	0	0	0	0	0	0
IW-2016_refine.337-0.Bac	River Group	Planctomycetota	Phycisphaerae	Phycisphaerales	SM1A02	UBA966	unclassified_UBA966	0	0	0	0	0	0	0	0	0	0	0	0	0	0	0	0	0	0	0	0	0	0	0	0	0	0	0	0	0	0	0	0	0	0	0	2	0	0	0	0	0	0
IW-2016_refine.341.Bac	River Group	Planctomycetota	Phycisphaerae	Phycisphaerales	SM1A02	unclassified_SM1A02	unclassified_SM1A02	0	0	0	0	0	0	0	0	0	0	0	0	0	0	0	0	0	0	0	0	0	0	0	0	0	0	0	0	0	0	0	0	0	0	0	1	0	1	0	0	0	0
IW-2016_refine.371-0.Bac	River Group	Bacteroidota	Bacteroidia	Flavobacteriales	Crocinitomicaceae	UBA952	unclassified_UBA952	0	1	0	0	0	0	0	0	0	0	0	0	0	0	0	0	0	0	0	0	0	0	0	0	0	0	0	0	0	0	0	0	0	0	0	3	0	0	0	0	0	0
IW-2016_refine.379-0.Bac	River Group	Actinobacteriota	Acidimicrobiia	Microtrichales	Ilumatobacteraceae	BACL27	unclassified_BACL27	0	0	0	0	0	0	0	0	0	0	0	0	0	0	0	0	0	0	0	0	0	0	0	0	0	0	0	0	0	0	0	0	0	0	0	1	0	0	0	0	0	0
IW-2016_refine.425.Bac	River Group	Verrucomicrobiota	Verrucomicrobiae	Verrucomicrobiales	Akkermansiaceae	UBA1315	unclassified_UBA1315	0	0	0	0	0	0	0	0	0	0	0	0	0	0	0	0	0	0	0	0	0	0	0	1	0	0	0	0	0	0	0	0	0	0	0	6	0	0	0	0	0	0
IW-2016_refine.432.Bac	River Group	Proteobacteria	Alphaproteobacteria	Rhodobacterales	Rhodobacteraceae	Pseudorhodobacter_A	unclassified_Pseudorhodobacter_A	0	0	0	0	0	0	0	0	0	0	0	0	0	0	0	0	0	0	2	0	0	0	0	2	0	0	0	0	0	0	0	0	0	0	0	3	0	0	0	0	0	0
IW-2016_refine.440-0.Bac	River Group	Proteobacteria	Gammaproteobacteria	Betaproteobacteriales	Burkholderiaceae	UBA954	GCA_002293155.1	0	0	0	0	0	0	0	0	0	0	0	0	0	0	0	0	0	0	0	0	0	0	0	1	0	0	0	0	0	0	0	0	0	0	0	0	0	1	0	0	0	0
IW-2016_refine.441-0.Bac	River Group	Proteobacteria	Alphaproteobacteria	Acetobacterales	Acetobacteraceae	Ga0074136	unclassified_Ga0074136	0	0	0	0	0	0	0	0	0	0	0	0	0	0	0	0	0	0	0	0	0	0	0	0	0	0	0	0	0	0	0	0	0	0	0	4	0	0	0	0	0	0
IW-2016_refine.444.Bac	River Group	Bacteroidota	Bacteroidia	Flavobacteriales	Crocinitomicaceae	Fluviicola	unclassified_Fluviicola	0	0	0	0	0	0	0	0	0	0	0	0	0	0	0	0	0	0	0	0	0	0	0	1	0	0	0	0	0	0	0	0	0	0	0	4	3	0	0	0	0	0
IW-2016_refine.456-0.Bac	River Group	Proteobacteria	Alphaproteobacteria	Rhizobiales	Beijerinckiaceae	28-YEA-48	unclassified_28-YEA-48	0	0	0	0	0	0	0	0	0	0	0	0	0	0	0	0	0	0	0	0	0	0	0	1	0	0	0	0	0	0	0	0	0	0	0	4	0	1	0	0	0	0
IW-2016_refine.492-0.Bac	River Group	Bacteroidota	Bacteroidia	Chitinophagales	Chitinophagaceae	OLB11	unclassified_OLB11	0	0	0	0	0	0	0	0	0	0	0	0	0	0	0	0	0	0	0	0	0	0	0	0	0	0	0	0	0	1	0	0	0	0	0	2	0	0	0	0	0	0
IW-2016_refine.517-0.Bac	River Group	Planctomycetota	Planctomycetes	Pirellulales	Pirellulaceae	Pirellula	unclassified_Pirellula	0	0	0	0	0	0	0	0	0	0	0	0	0	0	0	0	0	0	0	0	0	0	0	0	0	0	0	0	0	0	0	0	0	0	0	2	1	3	0	0	0	0
IW-2016_refine.538.Bac	River Group	Bacteroidota	Bacteroidia	Cytophagales	Spirosomaceae	UBA6715	unclassified_UBA6715	0	0	0	0	0	0	0	0	0	0	0	0	0	0	0	0	0	0	0	0	0	0	0	2	0	0	0	0	0	0	0	0	0	0	0	2	2	0	0	0	0	0
IW-2016_refine.544.Bac	River Group	Bacteroidota	Bacteroidia	Flavobacteriales	Crocinitomicaceae	Fluviicola	unclassified_Fluviicola	0	1	0	0	0	0	0	0	0	0	0	0	0	0	0	0	0	0	0	0	0	0	0	1	0	0	0	0	0	0	0	0	0	0	0	3	1	0	0	0	0	0
IW-2017_refine.007.Bac	River Group	Verrucomicrobiota	Verrucomicrobiae	Verrucomicrobiales	Akkermansiaceae	UBA956	unclassified_UBA956	0	0	0	0	0	0	0	0	0	0	0	0	0	0	0	0	0	0	0	0	0	0	0	0	0	0	0	0	0	0	0	0	0	0	0	4	0	0	0	0	0	0
IW-2017_refine.017.Bac	River Group	Proteobacteria	Gammaproteobacteria	Betaproteobacteriales	Burkholderiaceae	Limnohabitans	unclassified_Limnohabitans	0	0	0	0	0	0	0	0	0	0	0	0	0	0	0	0	0	0	0	0	0	0	0	2	0	0	0	0	0	0	0	0	0	0	0	4	0	2	0	0	0	0
IW-2017_refine.048-0.Bac	River Group	Actinobacteriota	Actinobacteria	Actinomycetales	Microbacteriaceae	Rhodoluna	Rhodoluna lacicola	0	0	0	0	0	0	0	0	0	0	0	0	0	0	0	0	0	0	0	0	0	0	0	0	0	0	0	0	0	0	0	0	0	0	0	0	0	0	0	0	0	0
IW-2017_refine.055.Bac	River Group	Proteobacteria	Alphaproteobacteria	Sphingomonadales	Sphingomonadaceae	Ga0077559	unclassified_Ga0077559	0	0	0	0	0	0	0	0	0	0	0	0	0	0	0	0	0	0	2	0	0	0	0	1	0	0	0	0	0	0	0	0	0	0	0	0	0	0	0	0	0	0
IW-2017_refine.065.Bac	River Group	Actinobacteriota	Acidimicrobiia	Microtrichales	Ilumatobacteraceae	UBA2093	unclassified_UBA2093	0	0	0	0	0	0	0	0	0	0	0	0	0	0	0	0	0	0	0	0	0	0	0	1	0	0	0	0	0	0	0	0	0	0	0	6	0	0	0	0	0	0
IW-2017_refine.067-0.Bac	River Group	Bacteroidota	Bacteroidia	Chitinophagales	Chitinophagaceae	UBA8137	unclassified_UBA8137	0	0	0	0	0	0	0	0	0	0	0	0	0	0	0	0	0	0	0	0	0	0	0	0	0	0	0	0	0	0	0	0	0	0	0	1	1	0	0	0	0	0
IW-2017_refine.069.Bac	River Group	Proteobacteria	Gammaproteobacteria	Betaproteobacteriales	Burkholderiaceae	Polaromonas	unclassified_Polaromonas	0	0	0	0	0	0	0	0	0	0	0	0	0	0	0	0	0	0	0	0	0	0	0	1	0	0	0	0	0	0	0	0	0	0	0	7	0	2	0	0	0	0
IW-2017_refine.075.Bac	River Group	Proteobacteria	Gammaproteobacteria	Betaproteobacteriales	Burkholderiaceae	SCGC-AAA027-K21	unclassified_SCGC-AAA027-K21	0	0	0	0	0	0	0	0	0	0	0	0	0	0	0	0	0	0	0	0	0	0	0	0	0	0	0	0	0	0	0	0	0	0	0	4	0	3	0	0	0	0
IW-2017_refine.078-0.Bac	River Group	Proteobacteria	Gammaproteobacteria	Betaproteobacteriales	Methylophilaceae	Methylotenera	unclassified_Methylotenera	0	0	0	0	0	0	0	0	0	0	0	0	0	0	0	0	0	0	0	0	0	0	0	1	0	0	0	0	0	0	0	0	0	0	0	1	0	0	0	0	0	0
IW-2017_refine.085.Bac	River Group	Proteobacteria	Gammaproteobacteria	Steroidobacterales	Steroidobacteraceae	unclassified_Steroidobacteraceae	unclassified_Steroidobacteraceae	0	0	0	0	0	0	0	0	0	0	0	0	0	0	0	0	0	0	0	0	0	0	0	1	0	0	0	0	0	0	0	0	0	0	0	1	1	0	0	0	0	0
IW-2017_refine.110-0.Bac	River Group	Actinobacteriota	Actinobacteria	Actinomycetales	Microbacteriaceae	Aurantimicrobium	Aurantimicrobium minutum	0	0	0	0	0	0	0	0	0	0	0	0	0	0	0	0	0	0	0	0	0	0	0	0	0	0	0	0	0	0	0	0	0	0	0	0	0	0	0	0	0	0
IW-2017_refine.113-0.Bac	River Group	Proteobacteria	Gammaproteobacteria	Betaproteobacteriales	Burkholderiaceae	unclassified_Burkholderiaceae	unclassified_Burkholderiaceae	0	0	0	0	0	0	0	0	0	0	0	0	0	0	0	0	0	0	0	0	0	0	0	1	0	0	0	0	0	0	0	0	0	0	0	8	0	0	0	0	0	0
IW-2017_refine.116-0.Bac	River Group	Proteobacteria	Gammaproteobacteria	Betaproteobacteriales	Burkholderiaceae	unclassified_Burkholderiaceae	unclassified_Burkholderiaceae	0	0	0	0	0	0	0	0	0	0	0	0	0	0	0	0	0	0	0	0	0	0	0	0	0	0	0	0	0	0	0	0	0	0	0	5	0	1	0	0	0	0
IW-2017_refine.126-0.Bac	River Group	Bacteroidota	Bacteroidia	Flavobacteriales	Crocinitomicaceae	40-80	unclassified_40-80	0	0	0	0	0	0	0	0	0	0	0	0	0	0	0	0	0	0	0	0	0	0	0	2	0	0	0	0	0	0	0	0	0	0	0	5	1	0	0	0	0	0
IW-2017_refine.129.Bac	River Group	Bacteroidota	Bacteroidia	Flavobacteriales	Cryomorphaceae	unclassified_Cryomorphaceae	unclassified_Cryomorphaceae	0	0	0	0	0	0	0	0	0	0	0	0	0	0	0	0	0	0	0	0	0	0	0	0	0	0	0	0	0	0	0	0	0	0	0	2	1	0	0	0	0	0
IW-2017_refine.133.Bac	River Group	Bacteroidota	Bacteroidia	Flavobacteriales	Crocinitomicaceae	UBA952	unclassified_UBA952	0	0	0	0	0	0	0	0	0	0	0	0	0	0	0	0	0	0	0	0	0	0	0	1	0	0	0	0	0	0	0	0	0	0	0	1	1	0	0	0	0	0
IW-2017_refine.139-0.Bac	River Group	Actinobacteriota	Acidimicrobiia	Microtrichales	Ilumatobacteraceae	UBA2093	unclassified_UBA2093	0	0	0	0	0	0	0	0	0	0	0	0	0	0	0	0	0	0	0	0	0	0	0	1	0	0	0	0	0	0	0	0	0	0	0	3	0	0	0	0	0	0
IW-2017_refine.142-0.Bac	River Group	Proteobacteria	Alphaproteobacteria	Sphingomonadales	Sphingomonadaceae	UBA1936	unclassified_UBA1936	0	0	0	0	0	0	0	0	0	0	0	0	0	0	0	0	0	0	1	0	0	0	0	1	0	0	0	0	0	0	0	0	0	0	0	1	1	0	0	0	0	0
IW-2017_refine.143-0.Bac	River Group	Proteobacteria	Gammaproteobacteria	Betaproteobacteriales	Methylophilaceae	Methylopumilus	unclassified_Methylopumilus	0	0	0	0	0	0	0	0	0	0	0	0	0	0	0	0	0	0	0	0	0	0	0	0	0	0	0	0	0	0	0	0	0	0	0	1	0	0	0	0	0	0
IW-2017_refine.158-0.Bac	River Group	Bacteroidota	Bacteroidia	Flavobacteriales	Crocinitomicaceae	UBA952	unclassified_UBA952	0	0	0	0	0	0	0	0	0	0	0	0	0	0	0	0	0	0	0	0	0	0	0	1	0	0	0	0	0	0	0	0	0	0	0	7	2	0	0	0	0	0
IW-2017_refine.174-0.Bac	River Group	Bacteroidota	Bacteroidia	Flavobacteriales	Crocinitomicaceae	UBA952	unclassified_UBA952	0	0	0	0	0	0	0	0	0	0	0	0	0	0	0	0	0	0	0	0	0	0	0	1	0	0	0	0	0	0	0	0	0	0	0	4	0	0	0	0	0	0
IW-2017_refine.187.Bac	River Group	Bacteroidota	Bacteroidia	Chitinophagales	Chitinophagaceae	OLB11	unclassified_OLB11	0	0	0	0	0	0	0	0	0	0	0	0	0	0	0	0	0	0	1	0	0	0	0	0	0	0	0	0	0	1	0	0	0	0	0	2	0	0	0	0	0	0
IW-2017_refine.198-0.Bac	River Group	Bacteroidota	Bacteroidia	NS11-12g	UBA955	UBA955	unclassified_UBA955	0	0	0	0	0	0	0	0	0	0	0	0	0	0	0	0	0	0	0	0	0	0	0	0	0	0	0	0	0	0	0	0	0	0	0	5	0	0	0	0	0	0
IW-2017_refine.214-0.Bac	River Group	Actinobacteriota	Actinobacteria	Corynebacteriales	Corynebacteriaceae	Mycobacterium	unclassified_Mycobacterium	0	0	0	0	0	0	0	0	0	0	0	0	0	0	0	0	0	0	0	0	0	0	0	0	0	0	0	0	0	0	0	0	0	0	0	1	0	0	0	0	0	0
IW-2017_refine.220-0.Bac	River Group	Bacteroidota	Bacteroidia	NS11-12g	UKL13-3	UBA6183	unclassified_UBA6183	0	0	0	0	0	0	0	0	0	0	0	0	0	0	0	0	0	0	0	0	0	0	0	0	0	0	0	0	0	0	0	0	0	0	0	1	1	0	0	0	0	0
IW-2017_refine.221.Bac	River Group	Bacteroidota	Bacteroidia	Flavobacteriales	Crocinitomicaceae	UBA952	unclassified_UBA952	0	0	0	0	0	0	0	0	0	0	0	0	0	0	0	0	0	0	0	0	0	0	0	1	0	0	0	0	0	0	0	0	0	0	0	3	0	0	0	0	0	0
IW-2017_refine.226-0.Bac	River Group	Bacteroidota	Bacteroidia	Chitinophagales	Chitinophagaceae	unclassified_Chitinophagaceae	unclassified_Chitinophagaceae	0	0	0	0	0	0	0	0	0	0	0	0	0	0	0	0	0	0	0	0	0	0	0	0	0	0	0	0	0	0	0	0	0	0	0	1	1	0	0	0	0	0
IW-2017_refine.243-0.Bac	River Group	Bacteroidota	Bacteroidia	Flavobacteriales	Crocinitomicaceae	unclassified_Crocinitomicaceae	unclassified_Crocinitomicaceae	0	5	0	0	0	0	0	0	0	0	0	0	0	0	0	0	0	0	0	0	0	0	0	0	0	0	0	0	0	0	0	0	0	0	0	9	2	0	0	0	0	0
IW-2017_refine.256.Bac	River Group	Bacteroidota	Bacteroidia	Flavobacteriales	Flavobacteriaceae	Flavobacterium	GCA_002422095.1	0	0	0	0	0	0	0	0	0	0	0	0	0	0	0	0	0	0	0	0	0	0	0	0	0	0	0	0	0	0	0	0	0	0	0	2	3	0	0	0	0	0
IW-2017_refine.270.Bac	River Group	Bacteroidota	Bacteroidia	NS11-12g	UKL13-3	UBA6183	unclassified_UBA6183	0	0	0	0	0	0	0	0	0	0	0	0	0	0	0	0	0	0	1	0	0	0	0	0	0	0	0	0	0	0	0	0	0	0	0	8	1	0	0	0	0	0
IW-2017_refine.281-0.Bac	River Group	Actinobacteriota	Actinobacteria	Actinomycetales	Microbacteriaceae	Aquiluna	unclassified_Aquiluna	0	0	0	0	0	0	0	0	0	0	0	0	0	0	0	0	0	0	0	0	0	0	0	0	0	0	0	0	0	0	0	0	0	0	0	1	0	0	0	0	0	0
IW-2017_refine.319-0.Bac	River Group	Actinobacteriota	Actinobacteria	Actinomycetales	Microbacteriaceae	Aquiluna	unclassified_Aquiluna	0	0	0	0	0	0	0	0	0	0	0	0	0	0	0	0	0	0	0	0	0	0	0	0	0	0	0	0	0	0	0	0	0	0	0	1	0	0	0	0	0	0
IW-2017_refine.372-0.Bac	River Group	Proteobacteria	Alphaproteobacteria	Sphingomonadales	Sphingomonadaceae	Novosphingobium	unclassified_Novosphingobium	0	0	0	0	0	0	0	0	0	0	0	0	0	0	0	0	0	0	2	0	0	0	0	1	0	0	0	0	0	0	0	0	0	0	0	2	0	0	0	0	0	0
IW-2017_refine.385-0.Bac	River Group	Verrucomicrobiota	Verrucomicrobiae	Verrucomicrobiales	Akkermansiaceae	UBA1315	unclassified_UBA1315	0	0	0	0	0	0	0	0	0	0	0	0	0	0	0	0	0	0	0	0	0	0	0	1	0	0	0	0	0	0	0	0	0	0	0	1	0	0	0	0	0	0
IW-2017_refine.422-0.Bac	River Group	Proteobacteria	Gammaproteobacteria	Betaproteobacteriales	Burkholderiaceae	unclassified_Burkholderiaceae	unclassified_Burkholderiaceae	0	0	0	0	0	0	0	0	0	0	0	0	0	0	0	0	0	0	0	0	0	0	0	1	0	0	0	0	0	0	0	0	0	0	0	5	0	1	0	0	0	0
IW-2017_refine.428.Bac	River Group	Bacteroidota	Bacteroidia	Chitinophagales	Chitinophagaceae	UBA1931	unclassified_UBA1931	0	0	0	0	0	0	0	0	0	0	0	0	0	0	0	0	0	0	0	0	0	0	0	1	0	0	0	0	0	0	0	0	0	0	0	2	0	0	0	0	0	0
IW-2017_refine.482.Bac	River Group	Bacteroidota	Bacteroidia	Flavobacteriales	Weeksellaceae	Cloacibacterium	UBA9901	0	0	0	0	0	0	0	0	0	0	0	0	0	0	0	0	0	0	2	0	0	0	0	1	0	0	0	0	0	0	0	0	0	0	0	4	1	0	0	0	0	0
IW-2017_refine.561.Bac	River Group	Desulfuromonadota	Desulfuromonadia	Geobacterales	Pelobacteraceae	Geobacter_C	unclassified_Geobacter_C	0	0	0	0	0	0	0	0	0	0	3	0	0	0	0	0	0	0	0	0	0	0	0	1	0	0	0	0	0	0	7	0	0	0	0	11	0	2	0	0	0	0
IW-2017_refine.600.Bac	River Group	Bacteroidota	Kapabacteria	Kapabacteriales	UBA961	UBA961	GCA_002293005.1	0	0	0	0	0	0	0	0	0	0	0	0	0	0	0	0	0	0	0	0	0	0	0	0	0	0	0	0	0	0	0	0	0	0	0	1	0	0	0	0	0	0
IW-2017_refine.645.Bac	River Group	Cyanobacteriota	Cyanobacteriia	Synechococcales_A	Cyanobiaceae	RCC307	unclassified_RCC307	0	0	0	0	0	0	0	0	0	0	0	0	0	0	0	0	0	0	1	0	0	0	0	0	0	0	0	0	0	0	0	0	0	0	0	1	0	0	0	0	0	0
IW-2018_refine.056-0.Bac	River Group	Actinobacteriota	Actinobacteria	Actinomycetales	Microbacteriaceae	Aurantimicrobium	Aurantimicrobium minutum	0	0	0	0	0	0	0	0	0	0	0	0	0	0	0	0	0	0	0	0	0	0	0	0	0	0	0	0	0	0	0	0	0	0	0	0	0	0	0	0	0	0
IW-2018_refine.064-0.Bac	River Group	Bacteroidota	Bacteroidia	Flavobacteriales	Crocinitomicaceae	Fluviicola	unclassified_Fluviicola	0	1	0	0	0	0	0	0	0	0	0	0	0	0	0	0	0	0	0	0	0	0	0	1	0	0	0	0	0	0	0	0	0	0	0	3	1	0	0	0	0	0
IW-2018_refine.122-0.Bac	River Group	Bacteroidota	Bacteroidia	NS11-12g	UKL13-3	UBA6183	unclassified_UBA6183	0	0	0	0	0	0	0	0	0	0	0	0	0	0	0	0	0	0	0	0	0	0	0	0	0	0	0	0	0	0	0	0	0	0	0	2	0	0	0	0	0	0
IW-2018_refine.140-0.Bac	River Group	Verrucomicrobiota	Verrucomicrobiae	Chthoniobacterales	Terrimicrobiaceae	UBA967	unclassified_UBA967	0	0	0	0	0	0	0	0	0	0	0	0	0	0	0	0	0	0	0	0	0	0	0	0	0	0	0	0	0	0	0	0	0	0	0	2	0	3	0	0	0	0
IW-2018_refine.151-0.Bac	River Group	Bacteroidota	Bacteroidia	Flavobacteriales	Crocinitomicaceae	UBA952	unclassified_UBA952	0	0	0	0	0	0	0	0	0	0	0	0	0	0	0	0	0	0	0	0	0	0	0	1	0	0	0	0	0	0	0	0	0	0	0	3	0	0	0	0	0	0
IW-2018_refine.160-0.Bac	River Group	Proteobacteria	Alphaproteobacteria	Sphingomonadales	Sphingomonadaceae	Novosphingobium	unclassified_Novosphingobium	0	0	0	0	0	0	0	0	0	0	0	0	0	0	0	0	0	0	1	0	0	0	0	1	0	0	0	0	0	0	0	0	0	0	0	1	0	0	0	0	0	0
IW-2018_refine.172-0.Bac	River Group	Actinobacteriota	Actinobacteria	Nanopelagicales	UBA5976	UBA5976	unclassified_UBA5976	0	0	0	0	0	0	0	0	0	0	0	0	0	0	0	0	0	0	0	0	0	0	0	0	0	0	0	0	0	0	0	0	0	0	0	1	0	0	0	0	0	0
IW-2018_refine.180-0.Bac	River Group	Bacteroidota	Bacteroidia	Sphingobacteriales	Sphingobacteriaceae	unclassified_Sphingobacteriaceae	unclassified_Sphingobacteriaceae	0	0	0	0	0	0	0	0	0	0	0	0	0	0	0	0	0	0	0	0	0	0	0	0	0	0	0	0	0	0	0	0	0	0	0	4	1	0	0	0	0	0
IW-2018_refine.181-0.Bac	River Group	Bacteroidota	Bacteroidia	Flavobacteriales	Crocinitomicaceae	unclassified_Crocinitomicaceae	unclassified_Crocinitomicaceae	0	1	0	0	0	0	0	0	0	0	0	0	0	0	0	0	0	0	0	0	0	0	0	0	0	0	0	0	0	0	1	0	0	0	0	4	0	0	0	0	0	0
IW-2018_refine.184.Bac	River Group	Bacteroidota	Bacteroidia	Sphingobacteriales	unclassified_Sphingobacteriales	unclassified_Sphingobacteriales	unclassified_Sphingobacteriales	0	0	0	0	0	0	0	0	0	0	0	0	0	0	0	0	0	0	0	0	0	0	0	0	0	0	0	0	0	0	0	0	0	0	0	6	1	0	0	0	0	0
IW-2018_refine.189.Bac	River Group	Bacteroidota	Bacteroidia	Chitinophagales	Chitinophagaceae	BSSC1	unclassified_BSSC1	0	0	0	0	0	0	0	0	0	0	0	0	0	0	0	0	0	0	2	0	0	0	0	2	0	0	0	0	0	0	1	0	0	0	0	1	1	0	0	0	0	0
IW-2018_refine.197-0.Bac	River Group	Proteobacteria	Gammaproteobacteria	Betaproteobacteriales	Burkholderiaceae	SCGC-AAA027-K21	unclassified_SCGC-AAA027-K21	0	0	0	0	0	0	0	0	0	0	0	0	0	0	0	0	0	0	0	0	3	0	0	1	0	0	0	0	0	0	0	0	0	0	0	3	0	4	0	0	0	0
IW-2018_refine.199-0.Bac	River Group	Bacteroidota	Bacteroidia	Flavobacteriales	Crocinitomicaceae	unclassified_Crocinitomicaceae	unclassified_Crocinitomicaceae	0	0	0	0	0	0	0	0	0	0	0	0	0	0	0	0	0	0	0	0	0	0	0	0	0	0	0	0	0	0	0	0	0	0	0	4	1	0	0	0	0	0
IW-2018_refine.204-0.Bac	River Group	Actinobacteriota	Actinobacteria	Actinomycetales	Microbacteriaceae	Agromyces	unclassified_Agromyces	0	0	0	0	0	0	0	0	0	0	0	0	0	0	0	0	0	0	0	0	0	0	0	0	0	0	0	0	0	0	0	0	0	0	0	1	0	0	0	0	0	0
IW-2018_refine.257-0.Bac	River Group	Proteobacteria	Alphaproteobacteria	Sphingomonadales	Sphingomonadaceae	UBA1936	unclassified_UBA1936	0	0	0	0	0	0	0	0	0	0	0	0	0	0	0	0	0	0	1	0	0	0	0	0	0	0	0	0	0	0	0	0	0	0	0	1	1	0	0	0	0	0
IW-2018_refine.287-0.Bac	River Group	Proteobacteria	Gammaproteobacteria	Betaproteobacteriales	Burkholderiaceae	unclassified_Burkholderiaceae	unclassified_Burkholderiaceae	0	0	0	0	0	0	0	0	0	0	0	0	0	0	0	0	0	0	0	0	0	0	0	1	0	0	0	0	0	0	0	0	0	0	0	7	0	1	0	0	0	0
IW-2018_refine.301-0.Bac	River Group	Bacteroidota	Bacteroidia	NS11-12g	UKL13-3	UBA6183	unclassified_UBA6183	0	0	0	0	0	0	0	0	0	0	0	0	0	0	0	0	0	0	1	0	0	0	0	0	0	0	0	0	0	0	0	0	0	0	0	4	1	0	0	0	0	0
IW-2018_refine.313-0.Bac	River Group	Proteobacteria	Alphaproteobacteria	Rhodobacterales	Rhodobacteraceae	Tabrizicola	unclassified_Tabrizicola	0	0	0	0	0	0	0	0	0	0	0	0	0	0	0	0	0	0	0	0	0	0	0	1	0	0	0	0	0	0	0	0	0	0	0	2	1	0	0	0	0	0
IW-2018_refine.328-0.Bac	River Group	Actinobacteriota	Actinobacteria	Actinomycetales	Microbacteriaceae	Rhodoluna	Rhodoluna planktonica	0	0	0	0	0	0	0	1	0	0	0	0	0	0	0	0	0	0	0	0	0	0	0	0	0	0	0	0	0	0	0	0	0	0	0	0	0	0	0	0	0	0
IW-2018_refine.382-0.Bac	River Group	Proteobacteria	Gammaproteobacteria	Betaproteobacteriales	Methylophilaceae	Methylopumilus_A	unclassified_Methylopumilus_A	0	0	0	0	0	0	0	0	0	0	0	0	0	0	0	0	0	0	0	0	0	0	0	1	0	0	0	0	0	0	0	0	0	0	0	1	0	0	0	0	0	0
IW-2018_refine.385-0.Bac	River Group	Actinobacteriota	Actinobacteria	Nanopelagicales	UBA5976	UBA5976	unclassified_UBA5976	0	0	0	0	0	0	0	0	0	0	0	0	0	0	0	0	0	0	0	0	0	0	0	0	0	0	0	0	0	0	0	0	0	0	0	1	0	0	0	0	0	0
IW-2018_refine.404.Bac	River Group	Armatimonadota	Chthonomonadetes	unclassified_Chthonomonadetes	unclassified_Chthonomonadetes	unclassified_Chthonomonadetes	unclassified_Chthonomonadetes	0	0	0	0	0	0	0	0	0	0	0	0	0	0	0	0	0	0	2	0	0	0	0	0	0	0	0	0	0	0	0	0	0	0	0	3	0	0	0	0	0	0
IW-2018_refine.449.Bac	River Group	Bacteroidota	Bacteroidia	Flavobacteriales	Weeksellaceae	Cloacibacterium	Cloacibacterium normanense	0	0	0	0	0	0	0	0	0	0	0	0	0	0	0	0	0	0	1	0	0	0	0	1	0	0	0	0	0	0	0	0	0	0	0	9	1	0	0	0	0	0
IW-2018_refine.55.Bac	River Group	Bacteroidota	Bacteroidia	NS11-12g	UBA955	UBA955	unclassified_UBA955	0	0	0	0	0	0	0	0	0	0	0	0	0	0	0	0	0	0	0	0	0	0	0	0	0	0	0	0	0	0	0	0	0	0	0	3	0	0	0	0	0	0
IW-2018_refine.60.Bac	River Group	Bacteroidota	Bacteroidia	Cytophagales	Spirosomaceae	UBA6715	unclassified_UBA6715	0	0	0	0	0	0	0	0	0	0	0	0	0	0	0	0	0	0	0	0	0	0	0	2	0	0	0	0	0	0	0	0	0	0	0	4	2	1	0	0	0	0
J-2017_refine.015.Bac	River Group	Bacteroidota	Bacteroidia	Cytophagales	Spirosomaceae	unclassified_Spirosomaceae	unclassified_Spirosomaceae	0	0	0	0	0	0	0	0	0	0	0	0	0	0	1	0	0	0	1	0	0	0	0	0	0	0	0	0	0	0	0	0	0	0	0	4	1	0	0	0	0	0
J-2017_refine.018.Bac	River Group	Bacteroidota	Bacteroidia	Flavobacteriales	Flavobacteriaceae	Flavobacterium	unclassified_Flavobacterium	0	0	0	0	0	0	0	0	0	0	0	0	0	0	0	0	0	0	1	0	0	0	0	2	0	0	0	0	0	0	0	0	0	0	0	3	1	0	0	0	0	0
J-2017_refine.051.Bac	River Group	Bacteroidota	Bacteroidia	NS11-12g	UKL13-3	UBA6183	unclassified_UBA6183	0	0	0	0	0	0	0	0	0	0	0	0	0	0	0	0	0	0	1	0	0	0	0	0	0	0	0	0	0	0	0	0	0	0	0	3	1	0	0	0	0	0
J-2017_refine.075-0.Bac	River Group	Proteobacteria	Gammaproteobacteria	Betaproteobacteriales	Burkholderiaceae	SCGC-AAA027-K21	unclassified_SCGC-AAA027-K21	0	0	0	0	0	0	0	0	0	0	0	0	0	0	0	0	0	0	0	0	0	0	0	0	0	0	0	0	0	0	0	0	0	0	0	2	0	2	0	0	0	0
J-2017_refine.090.Bac	River Group	Bacteroidota	Bacteroidia	Flavobacteriales	Flavobacteriaceae	Flavobacterium	unclassified_Flavobacterium	0	0	0	0	0	0	0	0	0	0	0	0	0	0	0	0	0	0	0	0	0	0	0	0	0	0	0	0	0	0	0	0	0	0	0	10	1	0	0	0	0	0
J-2017_refine.105.Bac	River Group	Actinobacteriota	Actinobacteria	Actinomycetales	Microbacteriaceae	Rhodoluna	unclassified_Rhodoluna	0	0	0	0	0	0	0	0	0	0	0	0	0	0	0	0	0	0	0	0	0	0	0	0	0	0	0	0	0	0	0	0	0	0	0	0	0	0	0	0	0	0
J-2017_refine.194.Bac	River Group	Proteobacteria	Gammaproteobacteria	Steroidobacterales	Steroidobacteraceae	unclassified_Steroidobacteraceae	unclassified_Steroidobacteraceae	0	0	0	0	0	0	0	0	0	0	0	0	0	0	0	0	0	0	0	0	0	0	0	1	0	0	0	0	0	0	0	0	0	0	0	1	1	0	0	0	0	0
J-2017_refine.197-0.Bac	River Group	Proteobacteria	Alphaproteobacteria	Rhizobiales	Beijerinckiaceae	Bosea	GCF_001713455.1	0	0	0	0	0	0	0	0	0	0	0	0	0	0	0	0	0	0	3	0	0	0	0	1	0	0	0	0	0	0	0	0	0	0	0	4	0	3	0	0	0	0
J-2017_refine.268.Bac	River Group	Planctomycetota	Planctomycetes	Planctomycetales	Planctomycetaceae	UBA10327	unclassified_UBA10327	0	0	0	0	0	0	0	0	0	0	0	0	0	0	0	0	0	0	1	0	0	0	0	0	0	0	0	0	0	0	0	0	0	0	0	3	0	3	0	0	0	0
J-2017_refine.305.Bac	River Group	Actinobacteriota	Actinobacteria	Nanopelagicales	unclassified_Nanopelagicales	unclassified_Nanopelagicales	unclassified_Nanopelagicales	0	0	0	0	0	0	0	0	0	0	0	0	0	0	0	0	0	0	0	0	0	0	0	0	0	0	0	0	0	0	0	0	0	0	0	1	0	0	0	0	0	0
J-2017_refine.308-0.Bac	River Group	Bacteroidota	Bacteroidia	Flavobacteriales	UA16	unclassified_UA16	unclassified_UA16	0	0	0	0	0	0	0	0	0	0	0	0	0	0	0	0	0	0	1	0	0	0	0	4	0	0	0	0	0	0	0	0	0	0	0	10	3	0	0	0	0	0
J-2017_refine.366.Bac	River Group	Bacteroidota	Bacteroidia	Chitinophagales	Saprospiraceae	unclassified_Saprospiraceae	unclassified_Saprospiraceae	0	0	0	0	0	0	0	0	0	0	0	0	0	0	0	0	0	0	0	0	0	0	0	0	0	0	0	0	0	0	0	0	0	0	0	4	0	0	0	0	0	0
J-2017_refine.371-0.Bac	River Group	Verrucomicrobiota	Verrucomicrobiae	Verrucomicrobiales	unclassified_Verrucomicrobiales	unclassified_Verrucomicrobiales	unclassified_Verrucomicrobiales	0	0	0	0	0	0	0	0	0	0	0	0	0	0	0	0	0	0	0	0	0	0	0	0	0	0	0	0	0	0	0	0	0	0	0	3	0	4	0	0	0	0
J-2018_refine.025-0.Bac	River Group	Bacteroidota	Bacteroidia	NS11-12g	UBA955	UBA955	unclassified_UBA955	0	0	0	0	0	0	0	0	0	0	0	0	0	0	0	0	0	0	0	0	0	0	0	0	0	0	0	0	0	0	0	0	0	0	0	1	0	0	0	0	0	0
J-2018_refine.035-0.Bac	River Group	Proteobacteria	Gammaproteobacteria	Betaproteobacteriales	Rhodocyclaceae	unclassified_Rhodocyclaceae	unclassified_Rhodocyclaceae	0	0	0	0	0	0	0	0	0	0	0	0	0	0	0	0	0	0	0	0	0	0	0	1	0	0	0	0	0	0	0	0	0	0	0	1	0	4	0	0	0	0
J-2018_refine.036-0.Bac	River Group	Actinobacteriota	Actinobacteria	Corynebacteriales	Corynebacteriaceae	Mycobacterium	unclassified_Mycobacterium	0	0	0	0	0	0	0	0	0	0	0	0	0	0	0	0	0	0	0	0	0	0	0	0	0	0	0	0	0	0	0	0	0	0	0	1	0	0	0	0	0	0
J-2018_refine.039-0.Bac	River Group	Actinobacteriota	Actinobacteria	Actinomycetales	Microbacteriaceae	Rhodoluna	unclassified_Rhodoluna	0	0	0	0	0	0	0	0	0	0	0	0	0	0	0	0	0	0	0	0	0	0	0	0	0	0	0	0	0	0	0	0	0	0	0	0	0	0	0	0	0	0
J-2018_refine.053-0.Bac	River Group	Proteobacteria	Gammaproteobacteria	Betaproteobacteriales	Methylophilaceae	Methylopumilus_A	unclassified_Methylopumilus_A	0	0	0	0	0	0	0	0	0	0	0	0	0	0	0	0	0	0	0	0	0	0	0	1	0	0	0	0	0	0	0	0	0	0	0	0	0	1	0	0	0	0
J-2018_refine.057-0.Bac	River Group	Proteobacteria	Alphaproteobacteria	Sphingomonadales	Sphingomonadaceae	Novosphingobium	unclassified_Novosphingobium	0	0	0	0	0	0	0	0	0	0	0	0	0	0	0	0	0	0	3	0	0	0	0	0	0	0	0	0	0	0	0	0	0	0	0	2	0	0	0	0	0	0
J-2018_refine.066-0.Bac	River Group	Bacteroidota	Bacteroidia	Flavobacteriales	Flavobacteriaceae	Flavobacterium	unclassified_Flavobacterium	0	0	0	0	0	0	0	0	0	0	0	0	0	0	0	0	0	0	1	0	0	0	0	0	0	0	0	0	0	0	0	0	0	0	0	3	1	0	0	0	0	0
J-2018_refine.076-0.Bac	River Group	Proteobacteria	Gammaproteobacteria	Betaproteobacteriales	Methylophilaceae	Methylopumilus	unclassified_Methylopumilus	0	0	0	0	0	0	0	0	0	0	0	0	0	0	0	0	0	0	0	0	0	0	0	0	0	0	0	0	0	0	0	0	0	0	0	1	0	0	0	0	0	0
J-2018_refine.096-0.Bac	River Group	Bacteroidota	Bacteroidia	Flavobacteriales	Flavobacteriaceae	Flavobacterium	unclassified_Flavobacterium	0	0	0	0	0	0	0	0	0	0	0	0	0	0	0	0	0	0	1	0	0	0	0	0	0	0	0	0	0	0	0	0	0	0	0	4	1	0	0	0	0	0
J-2018_refine.099-0.Bac	River Group	Verrucomicrobiota	Verrucomicrobiae	Opitutales	UBA953	UBA953	unclassified_UBA953	0	0	0	0	0	0	0	0	0	0	0	0	0	0	0	0	0	0	0	0	0	0	0	0	0	0	0	0	0	0	0	0	0	0	0	3	0	0	0	0	0	0
J-2018_refine.102.Bac	River Group	Proteobacteria	Gammaproteobacteria	Betaproteobacteriales	Burkholderiaceae	Limnohabitans	unclassified_Limnohabitans	0	0	0	0	0	0	0	0	0	0	0	0	0	0	0	0	0	0	0	0	0	0	0	2	0	0	0	0	0	0	0	0	0	0	0	5	0	2	0	0	0	0
J-2018_refine.104.Bac	River Group	Proteobacteria	Gammaproteobacteria	Betaproteobacteriales	Methylophilaceae	Methylotenera	unclassified_Methylotenera	0	0	0	2	0	0	0	0	0	0	0	0	0	0	0	0	0	0	0	0	0	0	0	1	0	0	0	0	0	0	0	0	0	0	0	4	0	1	0	0	0	0
J-2018_refine.107.Bac	River Group	Proteobacteria	Gammaproteobacteria	Betaproteobacteriales	Burkholderiaceae	Polynucleobacter	unclassified_Polynucleobacter	0	0	0	0	0	0	0	0	0	0	0	0	0	0	0	0	0	0	0	0	0	0	0	1	0	0	0	0	0	0	0	0	0	0	0	3	0	1	0	0	0	0
J-2018_refine.131.Bac	River Group	Bacteroidota	Bacteroidia	Chitinophagales	Chitinophagaceae	UBA3961	unclassified_UBA3961	0	0	0	0	0	0	0	0	0	0	0	0	0	0	0	0	0	0	0	0	0	0	0	1	0	0	0	0	0	0	0	0	0	0	0	3	1	1	0	0	0	0
J-2018_refine.140-0.Bac	River Group	Bacteroidota	Bacteroidia	Chitinophagales	Chitinophagaceae	unclassified_Chitinophagaceae	unclassified_Chitinophagaceae	0	0	0	0	0	0	0	0	0	0	0	0	0	0	0	0	0	0	0	0	0	0	0	0	0	0	0	0	0	0	0	0	0	0	0	3	1	0	0	0	0	0
J-2018_refine.143.Bac	River Group	Proteobacteria	Gammaproteobacteria	Betaproteobacteriales	Burkholderiaceae	Polynucleobacter	unclassified_Polynucleobacter	0	0	0	0	0	0	0	0	0	0	0	0	0	0	0	0	0	0	0	0	0	0	0	1	0	0	0	0	0	0	0	0	0	0	0	3	0	0	0	0	0	0
J-2018_refine.148-0.Bac	River Group	Proteobacteria	Gammaproteobacteria	Betaproteobacteriales	Burkholderiaceae	UBA954	unclassified_UBA954	0	0	0	0	0	0	0	0	0	0	0	0	0	0	0	0	0	0	0	0	0	0	0	1	0	0	0	0	0	0	0	0	0	0	0	2	0	1	0	0	0	0
J-2018_refine.16.Bac	River Group	Bacteroidota	Bacteroidia	Flavobacteriales	Crocinitomicaceae	unclassified_Crocinitomicaceae	unclassified_Crocinitomicaceae	0	1	0	0	0	0	0	0	0	0	0	0	0	0	0	0	0	0	0	0	0	0	0	0	0	0	0	0	0	0	1	0	0	0	0	5	1	0	0	0	0	0
J-2018_refine.172-0.Bac	River Group	Proteobacteria	Gammaproteobacteria	Betaproteobacteriales	Burkholderiaceae	SCGC-AAA027-K21	unclassified_SCGC-AAA027-K21	0	0	0	0	0	0	0	0	0	0	0	0	0	0	0	0	0	0	0	0	0	0	0	0	0	0	0	0	0	0	0	0	0	0	0	2	0	1	0	0	0	0
J-2018_refine.193.Bac	River Group	Proteobacteria	Gammaproteobacteria	Steroidobacterales	Steroidobacteraceae	UBA964	unclassified_UBA964	0	0	0	0	0	0	0	0	0	0	0	0	0	0	0	0	0	0	1	0	0	0	0	0	0	0	0	0	0	0	0	0	0	0	0	2	1	0	0	0	0	0
J-2018_refine.200-0.Bac	River Group	Proteobacteria	Gammaproteobacteria	Betaproteobacteriales	Burkholderiaceae	unclassified_Burkholderiaceae	unclassified_Burkholderiaceae	0	0	0	0	0	0	0	0	0	0	0	0	0	0	0	0	0	0	0	0	0	0	0	1	0	0	0	0	0	0	0	0	0	0	0	2	0	2	0	0	0	0
J-2018_refine.203.Bac	River Group	Bacteroidota	Bacteroidia	Chitinophagales	Chitinophagaceae	unclassified_Chitinophagaceae	unclassified_Chitinophagaceae	0	0	0	0	0	0	0	0	0	0	0	0	0	0	0	0	0	0	0	0	0	0	0	1	0	0	0	0	0	0	0	0	0	0	0	2	1	0	0	0	0	0
J-2018_refine.205-0.Bac	River Group	Proteobacteria	Gammaproteobacteria	Betaproteobacteriales	Burkholderiaceae	Polynucleobacter	unclassified_Polynucleobacter	0	0	0	0	0	0	0	0	0	0	0	0	0	0	0	0	0	0	0	0	0	0	0	2	0	0	0	0	0	0	0	0	0	0	0	1	0	1	0	0	0	0
J-2018_refine.221-0.Bac	River Group	Proteobacteria	Alphaproteobacteria	Caulobacterales	Caulobacteraceae	Phenylobacterium	unclassified_Phenylobacterium	0	0	0	0	0	0	0	0	0	0	0	0	0	0	1	0	0	0	1	0	0	0	0	1	0	0	0	0	0	0	0	0	0	0	0	3	1	0	0	0	0	0
J-2018_refine.227-0.Bac	River Group	Actinobacteriota	Actinobacteria	Actinomycetales	Microbacteriaceae	Aurantimicrobium	Aurantimicrobium minutum	0	0	0	0	0	0	0	0	0	0	0	0	0	0	0	0	0	0	0	0	0	0	0	0	0	0	0	0	0	0	0	0	0	0	0	0	0	0	0	0	0	0
J-2018_refine.241.Bac	River Group	Bacteroidota	Bacteroidia	NS11-12g	UBA955	unclassified_UBA955	unclassified_UBA955	0	0	0	0	0	0	0	0	0	0	0	0	0	0	0	0	0	0	0	0	0	0	0	0	0	0	0	0	0	0	0	0	0	0	0	4	0	0	0	0	0	0
J-2018_refine.243-0.Bac	River Group	Actinobacteriota	Actinobacteria	Corynebacteriales	Corynebacteriaceae	Mycobacterium	unclassified_Mycobacterium	0	0	0	0	0	0	0	0	0	0	0	0	0	0	0	0	0	0	2	0	0	0	0	1	0	0	0	0	0	0	0	0	0	0	0	0	0	0	0	0	0	0
J-2018_refine.248-0.Bac	River Group	Verrucomicrobiota	Verrucomicrobiae	Pedosphaerales	UBA9464	UBA9464	unclassified_UBA9464	0	0	0	0	0	0	0	0	0	0	0	0	0	0	0	0	0	0	0	0	0	0	0	0	0	0	0	0	0	0	0	0	0	0	0	3	0	2	0	0	0	0
J-2018_refine.255-0.Bac	River Group	Actinobacteriota	Actinobacteria	Nanopelagicales	S36-B12	unclassified_S36-B12	unclassified_S36-B12	0	0	0	0	0	0	0	0	0	0	0	0	0	0	0	0	0	0	0	0	0	0	0	0	0	0	0	0	0	0	0	0	0	0	0	4	0	0	0	0	0	0
J-2018_refine.256.Bac	River Group	Proteobacteria	Gammaproteobacteria	Betaproteobacteriales	Burkholderiaceae	UBA954	unclassified_UBA954	0	0	0	0	0	0	0	0	0	0	0	0	0	0	0	0	0	0	0	0	0	0	0	1	0	0	0	0	0	0	0	0	0	0	0	3	0	1	0	0	0	0
J-2018_refine.260.Bac	River Group	Actinobacteriota	Actinobacteria	Nanopelagicales	S36-B12	unclassified_S36-B12	unclassified_S36-B12	0	0	0	0	0	0	0	0	0	0	0	0	0	0	0	0	0	0	1	0	0	0	0	2	0	0	0	0	0	0	0	0	0	0	0	1	0	0	0	0	0	0
J-2018_refine.265.Bac	River Group	Bacteroidota	Kapabacteria	Kapabacteriales	Kapabacteriaceae	UBA2333	unclassified_UBA2333	0	0	0	0	0	0	0	0	0	0	0	0	0	0	0	0	0	0	0	0	0	0	0	0	0	0	0	0	0	0	0	0	0	0	0	3	0	0	0	0	0	0
J-2018_refine.267-0.Bac	River Group	Actinobacteriota	Actinobacteria	Nanopelagicales	AcAMD-5	unclassified_AcAMD-5	unclassified_AcAMD-5	0	0	0	0	0	0	0	0	0	0	0	0	0	0	0	0	0	0	0	0	0	0	0	0	0	0	0	0	0	0	0	0	0	0	0	3	0	0	0	0	0	0
J-2018_refine.268-0.Bac	River Group	Planctomycetota	Phycisphaerae	Phycisphaerales	SM1A02	UBA966	unclassified_UBA966	0	0	0	0	0	0	0	0	0	0	0	0	0	0	0	0	0	0	0	0	0	0	0	0	0	0	0	0	0	0	0	0	0	0	0	3	0	1	0	0	0	0
J-2018_refine.285-0.Bac	River Group	Proteobacteria	Alphaproteobacteria	Sphingomonadales	Sphingomonadaceae	unclassified_Sphingomonadaceae	unclassified_Sphingomonadaceae	0	0	0	0	0	0	0	0	0	0	0	0	0	0	0	0	0	0	5	0	0	0	0	4	0	0	0	0	0	0	0	0	0	0	0	2	1	0	0	0	0	0
J-2018_refine.286.Bac	River Group	Bacteroidota	Bacteroidia	Chitinophagales	Chitinophagaceae	unclassified_Chitinophagaceae	unclassified_Chitinophagaceae	0	0	0	0	0	0	0	0	0	0	0	0	0	0	0	0	0	0	0	0	0	0	0	0	0	0	0	0	0	0	0	0	0	0	0	1	0	1	0	0	0	0
J-2018_refine.29.Bac	River Group	Proteobacteria	Gammaproteobacteria	Betaproteobacteriales	Burkholderiaceae	Polynucleobacter	unclassified_Polynucleobacter	0	0	0	0	0	0	0	0	0	0	0	0	0	0	0	0	0	0	0	0	0	0	0	1	0	0	0	0	0	0	0	0	0	0	0	1	0	0	0	0	0	0
J-2018_refine.295-0.Bac	River Group	Bacteroidota	Bacteroidia	Flavobacteriales	UA16	unclassified_UA16	unclassified_UA16	0	0	0	0	0	0	0	0	0	0	0	0	0	0	0	0	0	0	1	0	0	0	0	0	0	0	0	0	0	0	0	0	0	0	0	4	1	0	0	0	0	0
J-2018_refine.302-0.Bac	River Group	Bacteroidota	Bacteroidia	Flavobacteriales	Cryomorphaceae	Coccinistipes	unclassified_Coccinistipes	0	0	0	0	0	0	0	0	0	0	0	0	0	0	0	0	0	0	0	0	0	0	0	0	0	0	0	0	0	0	0	0	0	0	0	2	1	0	0	0	0	0
J-2018_refine.307.Bac	River Group	Actinobacteriota	Actinobacteria	Nanopelagicales	Nanopelagicaceae	unclassified_Nanopelagicaceae	unclassified_Nanopelagicaceae	0	0	0	0	0	0	0	0	0	0	0	0	0	0	0	0	0	0	0	0	0	0	0	0	0	0	0	0	0	0	0	0	0	0	0	1	0	0	0	0	0	0
J-2018_refine.318-0.Bac	River Group	Bacteroidota	Bacteroidia	Cytophagales	Cyclobacteriaceae	Algoriphagus	unclassified_Algoriphagus	0	0	0	0	0	0	0	0	0	0	0	0	0	0	0	0	0	0	0	0	0	0	0	1	0	0	0	0	0	0	0	0	0	0	0	3	0	0	0	0	0	0
J-2018_refine.320-0.Bac	River Group	Bacteroidota	Bacteroidia	NS11-12g	UBA955	unclassified_UBA955	unclassified_UBA955	0	0	0	0	0	0	0	0	0	0	0	0	0	0	0	0	0	0	0	0	0	0	0	0	0	0	0	0	0	0	0	0	0	0	0	2	1	0	0	0	0	0
J-2018_refine.327.Bac	River Group	Bacteroidota	Kapabacteria	Kapabacteriales	Kapabacteriaceae	UBA10438	unclassified_UBA10438	0	0	0	0	0	0	0	0	0	0	0	0	0	0	0	0	0	0	0	0	0	0	0	0	0	0	0	0	0	0	0	0	0	0	0	3	0	1	0	0	0	0
J-2018_refine.341-0.Bac	River Group	Proteobacteria	Gammaproteobacteria	Betaproteobacteriales	Rhodocyclaceae	unclassified_Rhodocyclaceae	unclassified_Rhodocyclaceae	0	0	0	0	0	0	0	0	0	0	0	0	0	0	0	0	0	0	0	0	0	0	0	0	0	0	0	0	0	0	3	0	0	0	0	3	0	6	0	0	0	0
J-2018_refine.361-0.Bac	River Group	Proteobacteria	Gammaproteobacteria	Betaproteobacteriales	Rhodocyclaceae	unclassified_Rhodocyclaceae	unclassified_Rhodocyclaceae	0	0	0	0	0	0	0	0	0	0	0	0	0	0	0	0	0	0	0	0	0	0	0	1	0	0	0	0	0	0	0	0	0	0	0	1	0	4	0	0	0	0
J-2018_refine.379-0.Bac	River Group	Actinobacteriota	Actinobacteria	Actinomycetales	Microbacteriaceae	unclassified_Microbacteriaceae	unclassified_Microbacteriaceae	0	0	0	0	0	0	0	0	0	0	0	0	0	0	0	0	0	0	0	0	0	0	0	0	0	0	0	0	0	0	0	0	0	0	0	1	0	0	0	0	0	0
J-2018_refine.390.Bac	River Group	Bacteroidota	Bacteroidia	Cytophagales	Spirosomaceae	Runella	unclassified_Runella	0	0	0	0	0	0	0	0	0	0	0	0	0	0	0	0	0	0	8	0	0	0	0	0	0	0	0	0	0	0	0	0	0	0	0	6	2	0	0	0	0	0
J-2018_refine.41.Bac	River Group	Bacteroidota	Bacteroidia	Flavobacteriales	Crocinitomicaceae	UBA952	unclassified_UBA952	0	0	0	0	0	0	0	0	0	0	0	0	0	0	0	0	0	0	0	0	0	0	0	0	0	0	0	0	0	0	0	0	0	0	0	3	0	0	0	0	0	0
J-2018_refine.466-0.Bac	River Group	Bacteroidota	Bacteroidia	Chitinophagales	Chitinophagaceae	OLB11	unclassified_OLB11	0	0	0	0	0	0	0	0	0	0	0	0	0	0	0	0	0	0	1	0	0	0	0	0	0	0	0	0	0	1	0	0	0	0	0	2	0	0	0	0	0	0
J-2018_refine.468-0.Bac	River Group	Bacteroidota	Bacteroidia	Chitinophagales	Saprospiraceae	UBA10441	unclassified_UBA10441	0	0	0	0	0	0	0	0	0	0	0	0	0	0	0	0	0	0	0	0	0	0	0	1	0	0	0	0	0	0	0	0	0	0	0	2	0	0	0	0	0	0
J-2018_refine.5.Bac	River Group	Bacteroidota	Bacteroidia	NS11-12g	UBA955	UBA955	unclassified_UBA955	0	0	0	0	0	0	0	0	0	0	0	0	0	0	0	0	0	0	0	0	0	0	0	0	0	0	0	0	0	0	0	0	0	0	0	3	0	0	0	0	0	0
J-2018_refine.51.Bac	River Group	Bacteroidota	Bacteroidia	Flavobacteriales	UA16	unclassified_UA16	unclassified_UA16	0	0	0	0	0	0	0	0	0	0	0	0	0	0	0	0	0	0	2	0	0	0	0	1	0	0	0	0	0	0	0	0	0	0	0	3	1	0	0	0	0	0
J-2018_refine.522.Bac	River Group	Cyanobacteriota	Cyanobacteriia	Cyanobacteriales	Microcystaceae	Microcystis	Microcystis aeruginosa_A	0	0	0	0	0	0	0	0	0	0	0	0	0	0	0	0	0	0	7	0	0	0	0	0	0	0	0	0	0	0	0	0	0	0	0	5	0	0	0	0	0	0
J-2018_refine.55.Bac	River Group	Proteobacteria	Alphaproteobacteria	Sphingomonadales	Sphingomonadaceae	UBA1936	unclassified_UBA1936	0	0	0	0	0	0	0	0	0	0	0	0	0	0	0	0	0	0	1	0	0	0	0	0	0	0	0	0	0	0	0	0	0	0	0	4	0	0	0	0	0	0
J-2018_refine.59.Bac	River Group	Bacteroidota	Bacteroidia	Flavobacteriales	Crocinitomicaceae	Fluviicola	unclassified_Fluviicola	0	1	0	0	0	0	0	0	0	0	0	0	0	0	0	0	0	0	0	0	0	0	0	1	0	0	0	0	0	0	0	0	0	0	0	7	1	0	0	0	0	0
J-2018_refine.7.Bac	River Group	Bacteroidota	Bacteroidia	Cytophagales	Spirosomaceae	UBA6715	unclassified_UBA6715	0	0	0	0	0	0	0	0	0	0	0	0	0	0	0	0	0	0	0	0	0	0	0	0	0	0	0	0	0	0	0	0	0	0	0	1	1	0	0	0	0	0
J-2018_refine.77.Bac	River Group	Proteobacteria	Gammaproteobacteria	Betaproteobacteriales	Rhodocyclaceae	unclassified_Rhodocyclaceae	unclassified_Rhodocyclaceae	0	0	0	0	0	0	0	0	0	0	0	0	0	0	0	0	0	0	0	0	0	0	0	0	0	0	0	0	0	0	2	0	0	0	0	1	0	5	0	0	0	0
J-2018_refine.9.Bac	River Group	Bacteroidota	Bacteroidia	Chitinophagales	Chitinophagaceae	unclassified_Chitinophagaceae	unclassified_Chitinophagaceae	0	0	0	0	0	0	0	0	0	0	0	0	0	0	0	0	0	0	0	0	0	0	0	0	0	0	0	0	0	2	0	0	0	0	0	2	0	0	0	0	0	0
J-2018_refine.95.Bac	River Group	Proteobacteria	Alphaproteobacteria	Sphingomonadales	Sphingomonadaceae	UBA1936	unclassified_UBA1936	0	0	0	0	0	0	0	0	0	0	0	0	0	0	0	0	0	0	1	0	0	0	0	1	0	0	0	0	0	0	0	0	0	0	0	1	1	0	0	0	0	0
JH-2018_refine.017-0.Bac	River Group	Proteobacteria	Gammaproteobacteria	Betaproteobacteriales	Burkholderiaceae	UBA3064	unclassified_UBA3064	0	0	0	0	0	0	0	0	0	0	0	0	0	0	0	0	0	0	0	0	0	0	0	1	0	0	0	0	0	0	0	0	0	0	0	3	0	0	0	0	0	0
JH-2018_refine.045-0.Bac	River Group	Cyanobacteriota	Cyanobacteriia	Limnotrichales	Limnotrichaceae	Limnothrix	GCF_002742025.1	0	0	0	0	0	0	0	0	0	0	0	0	0	0	0	0	0	0	1	0	0	0	0	0	0	0	0	0	0	0	0	0	0	0	0	5	0	0	0	0	0	0
JH-2018_refine.051-0.Bac	River Group	Bacteroidota	Bacteroidia	Chitinophagales	Saprospiraceae	UBA10441	unclassified_UBA10441	0	0	0	0	0	0	0	0	0	0	0	0	0	0	0	0	0	0	0	0	0	0	0	0	0	0	0	0	0	0	0	0	0	0	0	3	1	0	0	0	0	0
JH-2018_refine.060-0.Bac	River Group	Proteobacteria	Gammaproteobacteria	Betaproteobacteriales	Burkholderiaceae	Rubrivivax	unclassified_Rubrivivax	0	0	0	0	0	0	0	0	0	0	0	0	0	0	0	0	0	0	0	0	0	0	0	2	0	0	0	0	0	0	0	0	0	0	0	3	1	0	0	0	0	0
JH-2018_refine.061-0.Bac	River Group	Proteobacteria	Gammaproteobacteria	Betaproteobacteriales	Burkholderiaceae	GJ-E10	unclassified_GJ-E10	0	0	0	0	0	0	0	0	0	0	0	0	0	0	0	0	0	0	0	0	0	0	0	1	0	0	0	0	0	0	0	0	0	0	0	2	1	0	0	0	0	0
JH-2018_refine.064-0.Bac	River Group	Proteobacteria	Alphaproteobacteria	Sphingomonadales	Sphingomonadaceae	Porphyrobacter	unclassified_Porphyrobacter	0	0	0	0	0	0	0	0	0	0	0	0	0	0	0	0	0	0	2	0	0	0	0	0	0	0	0	0	0	0	0	0	0	0	0	0	0	0	0	0	0	0
JH-2018_refine.070-0.Bac	River Group	Proteobacteria	Gammaproteobacteria	Betaproteobacteriales	Burkholderiaceae	Polaromonas	unclassified_Polaromonas	0	0	0	0	0	0	0	0	0	0	0	0	0	0	0	0	0	0	0	0	0	0	0	4	0	0	0	0	0	0	0	0	0	0	0	4	0	3	0	0	0	0
JH-2018_refine.075-0.Bac	River Group	Cyanobacteriota	Cyanobacteriia	Synechococcales_A	Cyanobiaceae	Cyanobium	unclassified_Cyanobium	0	0	0	0	0	0	0	0	0	0	0	0	0	0	0	0	0	0	0	0	0	0	0	0	0	0	0	0	0	0	0	0	0	0	0	4	0	0	0	0	0	0
JH-2018_refine.081-0.Bac	River Group	Bacteroidota	Bacteroidia	Flavobacteriales	Crocinitomicaceae	40-80	unclassified_40-80	0	0	0	0	0	0	0	0	0	0	0	0	0	0	0	0	0	0	0	0	0	0	0	2	0	0	0	0	0	0	0	0	0	0	0	3	0	0	0	0	0	0
JH-2018_refine.094-0.Bac	River Group	Proteobacteria	Gammaproteobacteria	Betaproteobacteriales	Rhodocyclaceae	unclassified_Rhodocyclaceae	unclassified_Rhodocyclaceae	0	0	0	0	0	0	0	0	0	0	0	0	0	0	0	0	0	0	0	0	0	0	0	1	0	0	0	0	0	0	0	0	0	0	0	2	0	5	0	0	0	0
JH-2018_refine.097-0.Bac	River Group	Cyanobacteriota	Cyanobacteriia	Synechococcales_A	Cyanobiaceae	Cyanobium	unclassified_Cyanobium	0	0	0	0	0	0	0	0	0	0	0	0	0	0	0	0	0	0	0	0	0	0	0	0	0	0	0	0	0	0	0	0	0	0	0	3	0	0	0	0	0	0
JH-2018_refine.101.Bac	River Group	Proteobacteria	Gammaproteobacteria	Betaproteobacteriales	Burkholderiaceae	Polaromonas	unclassified_Polaromonas	0	0	0	2	0	0	0	0	0	0	0	0	0	0	0	0	0	0	0	0	0	0	0	2	0	0	0	0	0	0	0	0	0	0	0	2	0	2	0	0	0	0
JH-2018_refine.106.Bac	River Group	Bacteroidota	Bacteroidia	AKYH767	unclassified_AKYH767	unclassified_AKYH767	unclassified_AKYH767	0	1	0	0	0	0	0	0	0	0	0	0	0	0	0	0	0	0	0	0	0	0	0	0	0	0	0	0	0	0	0	0	0	0	0	3	0	0	0	0	0	0
JH-2018_refine.108.Bac	River Group	Bacteroidota	Bacteroidia	Chitinophagales	Chitinophagaceae	UBA8137	unclassified_UBA8137	0	0	0	0	0	0	0	0	0	0	0	0	0	0	0	0	0	0	1	0	0	0	0	0	0	0	0	0	0	0	0	0	0	0	0	3	1	0	0	0	0	0
JH-2018_refine.114-0.Bac	River Group	Bacteroidota	Bacteroidia	Chitinophagales	Chitinophagaceae	JJ008	unclassified_JJ008	0	0	0	0	0	0	0	0	0	0	0	0	0	0	0	0	0	0	0	0	0	0	0	0	0	0	0	0	0	0	0	0	0	0	0	11	0	0	0	0	0	0
JH-2018_refine.115.Bac	River Group	Proteobacteria	Gammaproteobacteria	Steroidobacterales	Steroidobacteraceae	UBA964	unclassified_UBA964	0	0	0	0	0	0	0	0	0	0	0	0	0	0	0	0	0	0	1	0	0	0	0	0	0	0	0	0	0	0	0	0	0	0	0	2	1	0	0	0	0	0
JH-2018_refine.118.Bac	River Group	Bacteroidota	Bacteroidia	Flavobacteriales	UA16	unclassified_UA16	unclassified_UA16	0	0	0	0	0	0	0	0	0	0	0	0	0	0	0	0	0	0	2	0	0	0	0	6	0	0	0	0	0	0	0	0	0	0	0	10	1	0	0	0	0	0
JH-2018_refine.120-0.Bac	River Group	Bacteroidota	Bacteroidia	Flavobacteriales	GCA-002722245	unclassified_GCA-002722245	unclassified_GCA-002722245	0	0	0	0	0	0	0	0	0	0	0	0	0	0	0	0	0	0	0	0	0	0	0	0	0	0	0	0	0	0	0	0	0	0	0	5	0	0	0	0	0	0
JH-2018_refine.126-0.Bac	River Group	Actinobacteriota	Acidimicrobiia	Microtrichales	Ilumatobacteraceae	unclassified_Ilumatobacteraceae	unclassified_Ilumatobacteraceae	0	1	0	0	0	0	0	0	0	0	0	0	0	0	0	0	0	0	0	0	0	0	0	1	0	0	0	0	0	0	0	0	0	0	0	4	0	0	0	0	0	0
JH-2018_refine.127.Bac	River Group	Proteobacteria	Alphaproteobacteria	Caulobacterales	Hyphomonadaceae	Aquidulcibacter	unclassified_Aquidulcibacter	0	0	0	0	0	0	0	0	0	0	0	0	0	0	0	0	0	0	2	0	0	0	0	0	0	0	0	0	0	0	0	0	0	0	0	4	1	0	0	0	0	0
JH-2018_refine.128.Bac	River Group	Bacteroidota	Bacteroidia	Flavobacteriales	Crocinitomicaceae	GCA-2696025	unclassified_GCA-2696025	0	0	0	0	0	0	0	0	0	0	0	0	0	0	0	0	0	0	0	0	0	0	0	0	0	0	0	0	0	1	0	0	0	0	0	3	0	0	0	0	0	0
JH-2018_refine.130-0.Bac	River Group	Cyanobacteriota	Cyanobacteriia	Synechococcales_A	Cyanobiaceae	Cyanobium	unclassified_Cyanobium	0	0	0	0	0	0	0	0	0	0	0	0	0	0	0	0	0	0	2	0	0	0	0	0	0	0	0	0	0	0	0	0	0	0	0	4	0	7	0	0	0	0
JH-2018_refine.131.Bac	River Group	Actinobacteriota	Actinobacteria	Nanopelagicales	Nanopelagicaceae	Planktophila	unclassified_Planktophila	0	0	0	0	0	0	0	0	0	0	0	0	0	0	0	0	0	0	0	0	0	0	0	0	0	0	0	0	0	0	0	0	0	0	0	1	0	0	0	0	0	0
JH-2018_refine.141-0.Bac	River Group	Bacteroidota	Kapabacteria	Kapabacteriales	Kapabacteriaceae	UBA10438	unclassified_UBA10438	0	0	0	0	0	0	0	0	0	0	0	0	0	0	0	0	0	0	0	0	0	0	0	0	0	0	0	0	0	0	0	0	0	0	0	3	0	1	0	0	0	0
JH-2018_refine.149-0.Bac	River Group	Verrucomicrobiota	Verrucomicrobiae	Pedosphaerales	UBA9464	UBA9464	unclassified_UBA9464	0	0	0	0	0	0	0	0	0	0	0	0	0	0	0	0	0	0	0	0	0	0	0	0	0	0	0	0	0	0	0	0	0	0	0	3	0	1	0	0	0	0
JH-2018_refine.153.Bac	River Group	Verrucomicrobiota	Verrucomicrobiae	Pedosphaerales	UBA9464	UBA6176	unclassified_UBA6176	0	0	0	0	0	0	0	0	0	0	0	0	0	0	0	0	0	0	0	0	0	0	0	1	0	0	0	0	0	0	0	0	0	0	0	2	0	1	0	0	0	0
JH-2018_refine.160-0.Bac	River Group	Actinobacteriota	Acidimicrobiia	Microtrichales	Ilumatobacteraceae	UBA2093	unclassified_UBA2093	0	0	0	0	0	0	0	0	0	0	0	0	0	0	0	0	0	0	0	0	0	0	0	1	0	0	0	0	0	0	0	0	0	0	0	3	0	0	0	0	0	0
JH-2018_refine.165.Bac	River Group	Bacteroidota	Bacteroidia	UBA7662	UBA7662	unclassified_UBA7662	unclassified_UBA7662	0	0	0	0	0	0	0	0	0	0	0	0	0	0	0	0	0	0	0	0	0	0	0	0	0	0	0	0	0	0	0	0	0	0	0	2	0	0	0	0	0	0
JH-2018_refine.167.Bac	River Group	Proteobacteria	Alphaproteobacteria	Acetobacterales	unclassified_Acetobacterales	unclassified_Acetobacterales	unclassified_Acetobacterales	0	0	0	0	0	0	0	0	0	0	0	0	0	0	0	0	0	0	0	0	0	0	0	2	0	0	0	0	0	0	0	0	0	0	0	3	1	1	0	0	0	0
JH-2018_refine.175.Bac	River Group	Bacteroidota	Bacteroidia	NS11-12g	UKL13-3	B1	unclassified_B1	0	0	0	0	0	0	0	0	0	0	0	0	0	0	0	0	0	0	1	0	0	0	0	0	0	0	0	0	0	0	0	0	0	0	0	5	0	0	0	0	0	0
JH-2018_refine.179.Bac	River Group	Planctomycetota	Planctomycetes	Planctomycetales	Planctomycetaceae	UBA10327	UBA10327 sp2	0	0	0	0	0	0	0	0	0	0	0	0	0	0	0	0	0	0	1	0	0	0	0	0	0	0	0	0	0	0	0	0	0	0	0	4	0	2	0	0	0	0
JH-2018_refine.182-0.Bac	River Group	Proteobacteria	Gammaproteobacteria	Betaproteobacteriales	Burkholderiaceae	unclassified_Burkholderiaceae	unclassified_Burkholderiaceae	0	0	0	0	0	0	0	0	0	0	0	0	0	0	0	0	0	0	0	0	0	0	0	1	0	0	0	0	0	0	0	0	0	0	0	4	0	1	0	0	0	0
JH-2018_refine.186.Bac	River Group	Cyanobacteriota	Cyanobacteriia	Pseudanabaenales	Pseudanabaenaceae	unclassified_Pseudanabaenaceae	unclassified_Pseudanabaenaceae	0	0	0	0	0	0	0	0	0	0	0	0	0	0	0	0	0	0	1	0	0	0	0	1	0	0	0	0	0	0	1	0	0	0	0	2	0	0	0	0	0	0
JH-2018_refine.201.Bac	River Group	Bacteroidota	Bacteroidia	Chitinophagales	Saprospiraceae	Haliscomenobacter	unclassified_Haliscomenobacter	0	0	0	0	0	0	0	0	0	0	0	0	0	0	0	0	0	0	1	0	0	0	0	1	0	0	0	0	0	0	0	0	0	0	0	4	1	0	0	0	0	0
JH-2018_refine.229.Bac	River Group	Proteobacteria	Gammaproteobacteria	Betaproteobacteriales	Burkholderiaceae	UBA2463	unclassified_UBA2463	0	0	0	0	0	0	0	0	0	0	0	0	0	0	0	0	0	0	0	0	0	0	0	2	0	0	0	0	0	0	0	0	0	0	0	2	0	0	0	0	0	0
JH-2018_refine.250.Bac	River Group	Verrucomicrobiota	Verrucomicrobiae	Opitutales	Opitutaceae	UBA6669	unclassified_UBA6669	0	0	0	0	0	0	0	0	0	0	0	0	0	0	0	0	0	0	0	0	0	0	0	0	0	0	0	0	0	0	0	0	0	0	0	2	0	2	0	0	0	0
JH-2018_refine.257-0.Bac	River Group	Bacteroidota	Bacteroidia	Flavobacteriales	Crocinitomicaceae	UBA952	unclassified_UBA952	0	1	0	0	0	0	0	0	0	0	0	0	0	0	0	0	0	0	1	0	0	0	0	0	0	0	0	0	0	0	0	0	0	0	0	7	0	0	0	0	0	0
JH-2018_refine.261.Bac	River Group	Cyanobacteriota	Vampirovibrionia	Vampirovibrionales	unclassified_Vampirovibrionales	unclassified_Vampirovibrionales	unclassified_Vampirovibrionales	0	0	0	0	0	0	0	0	0	0	0	0	0	0	0	0	0	0	1	0	0	0	0	0	0	0	0	0	0	0	0	0	0	0	0	2	0	0	0	0	0	0
JH-2018_refine.273-0.Bac	River Group	Proteobacteria	Gammaproteobacteria	Betaproteobacteriales	Burkholderiaceae	UBA4657	GCA_002405475.1	0	0	0	0	0	0	0	0	0	0	0	0	0	0	0	0	0	0	0	0	0	0	0	0	0	0	0	0	0	0	0	0	0	0	0	2	0	0	0	0	0	0
JH-2018_refine.28.Bac	River Group	Verrucomicrobiota	Verrucomicrobiae	Opitutales	UBA953	UBA953	unclassified_UBA953	0	0	0	0	0	0	0	0	0	0	0	0	0	0	0	0	0	0	0	0	0	0	0	1	0	0	0	0	0	0	0	0	0	0	0	2	0	1	0	0	0	0
JH-2018_refine.288-0.Bac	River Group	Bacteroidota	Bacteroidia	Cytophagales	UBA9547	unclassified_UBA9547	unclassified_UBA9547	0	0	0	0	0	0	0	0	0	0	0	0	0	0	0	0	0	0	0	0	0	0	0	0	0	0	0	0	0	0	0	0	0	0	0	3	1	0	0	0	0	0
JH-2018_refine.301.Bac	River Group	Verrucomicrobiota	Verrucomicrobiae	Verrucomicrobiales	Verrucomicrobiaceae	Prosthecobacter	unclassified_Prosthecobacter	0	0	0	0	0	0	0	0	0	0	0	0	0	0	0	0	0	0	0	0	0	0	0	0	0	0	0	0	0	0	0	0	0	0	0	2	0	0	0	0	0	0
JH-2018_refine.307.Bac	River Group	Acidobacteriota	Blastocatellia	Pyrinomonadales	unclassified_Pyrinomonadales	unclassified_Pyrinomonadales	unclassified_Pyrinomonadales	0	0	0	0	0	0	0	0	0	0	0	0	0	0	0	0	0	0	2	0	0	0	0	1	0	0	0	0	0	0	1	0	0	0	0	6	0	0	0	0	0	0
JH-2018_refine.340.Bac	River Group	Proteobacteria	Gammaproteobacteria	Enterobacterales	Aeromonadaceae	Aeromonas	Aeromonas veronii	0	0	0	0	0	0	0	0	0	0	0	0	0	0	0	0	0	0	0	0	0	0	0	0	0	0	0	1	0	0	1	0	0	0	0	2	0	0	0	0	0	0
JH-2018_refine.38.Bac	River Group	Proteobacteria	Alphaproteobacteria	Sphingomonadales	Sphingomonadaceae	UBA1936	unclassified_UBA1936	0	0	0	0	0	0	0	0	0	0	0	0	0	0	0	0	0	0	2	0	0	0	0	0	0	0	0	0	0	0	0	0	0	0	0	4	0	0	0	0	0	0
JH-2018_refine.43.Bac	River Group	Bacteroidota	Bacteroidia	Flavobacteriales	unclassified_Flavobacteriales	unclassified_Flavobacteriales	unclassified_Flavobacteriales	0	0	0	0	0	0	0	0	0	0	0	0	0	0	0	0	0	0	0	0	0	0	0	1	0	0	0	0	0	0	0	0	0	0	0	3	0	0	0	0	0	0
JH-2018_refine.46.Bac	River Group	Actinobacteriota	Actinobacteria	Actinomycetales	Microbacteriaceae	Aquiluna	unclassified_Aquiluna	0	0	0	0	0	0	0	0	0	0	0	0	0	0	0	0	0	0	0	0	0	0	0	0	0	0	0	0	0	0	0	0	0	0	0	0	0	0	0	0	0	0
JH-2018_refine.49.Bac	River Group	Bacteroidota	Kapabacteria	Kapabacteriales	UBA961	UBA961	GCA_002293005.1	0	0	0	0	0	0	0	0	0	0	0	0	0	0	0	0	0	0	0	0	0	0	0	0	0	0	0	0	0	0	0	0	0	0	0	2	0	0	0	0	0	0
JH-2018_refine.6.Bac	River Group	Proteobacteria	Gammaproteobacteria	Betaproteobacteriales	Burkholderiaceae	Polynucleobacter	unclassified_Polynucleobacter	0	0	0	0	0	0	0	0	0	0	0	0	0	0	0	0	0	0	0	0	0	0	0	1	0	0	0	0	0	0	0	0	0	0	0	2	0	0	0	0	0	0
JH-2018_refine.69.Bac	River Group	Chloroflexota	Chloroflexia	Chloroflexales	Roseiflexaceae	UBA965	unclassified_UBA965	0	0	0	0	1	0	0	0	0	0	0	0	0	0	0	0	0	0	1	0	0	0	0	0	0	0	0	0	0	0	0	0	0	0	0	11	0	0	0	0	0	0
JH-2018_refine.77.Bac	River Group	Actinobacteriota	Acidimicrobiia	Microtrichales	Ilumatobacteraceae	UBA2093	unclassified_UBA2093	0	0	0	0	0	0	0	0	0	0	0	0	0	0	0	0	0	0	0	0	0	0	0	1	0	0	0	0	0	0	0	0	0	0	0	4	0	0	0	0	0	0
JH-2018_refine.80.Bac	River Group	Planctomycetota	Planctomycetes	Pirellulales	Pirellulaceae	Pirellula	unclassified_Pirellula	0	0	0	0	0	0	0	0	0	0	0	0	0	0	0	0	0	0	1	0	0	0	0	0	0	0	0	0	0	0	0	0	0	0	0	2	1	4	0	0	0	0
JH-2018_refine.82.Bac	River Group	Actinobacteriota	Actinobacteria	Nanopelagicales	Nanopelagicaceae	unclassified_Nanopelagicaceae	unclassified_Nanopelagicaceae	0	0	0	0	0	0	0	0	0	0	0	0	0	0	0	0	0	0	0	0	0	0	0	0	0	0	0	0	0	0	0	0	0	0	0	1	0	0	0	0	0	0
JH-2018_refine.88.Bac	River Group	Bacteroidota	Bacteroidia	Flavobacteriales	GCA-002722245	unclassified_GCA-002722245	unclassified_GCA-002722245	0	0	0	0	0	0	0	0	0	0	0	0	0	0	0	0	0	0	0	0	0	0	0	0	0	0	0	0	0	0	0	0	0	0	0	5	0	0	0	0	0	0
JH-2018_refine.89.Bac	River Group	Actinobacteriota	Actinobacteria	Nanopelagicales	S36-B12	unclassified_S36-B12	unclassified_S36-B12	0	0	0	0	0	0	0	0	0	0	0	0	0	0	0	0	0	0	0	0	0	0	0	0	0	0	0	0	0	0	0	0	0	0	0	0	0	0	0	0	0	0
JY-2018_refine.074-0.Bac	River Group	Verrucomicrobiota	Verrucomicrobiae	Pedosphaerales	UBA9464	UBA9464	unclassified_UBA9464	0	0	0	0	0	0	0	0	0	0	0	0	0	0	0	0	0	0	0	0	0	0	0	0	0	0	0	0	0	0	0	0	0	0	0	2	0	1	0	0	0	0
JY-2018_refine.093-0.Bac	River Group	Bacteroidota	Bacteroidia	Flavobacteriales	Flavobacteriaceae	Flavobacterium	unclassified_Flavobacterium	0	0	0	0	0	0	0	0	0	0	0	0	0	0	0	0	0	0	0	0	0	0	0	0	0	0	0	0	0	0	0	0	0	0	0	2	1	0	0	0	0	0
JY-2018_refine.093-1.Bac	River Group	Bacteroidota	Bacteroidia	Flavobacteriales	Flavobacteriaceae	Flavobacterium	unclassified_Flavobacterium	0	0	0	0	0	0	0	0	0	0	0	0	0	0	0	0	0	0	0	0	0	0	0	1	0	0	0	0	0	0	0	0	0	0	0	2	1	0	0	0	0	0
JY-2018_refine.105-0.Bac	River Group	Bacteroidota	Bacteroidia	Flavobacteriales	Cryomorphaceae	Coccinistipes	unclassified_Coccinistipes	0	0	0	0	0	0	0	0	0	0	0	0	0	0	0	0	0	0	0	0	0	0	0	0	0	0	0	0	0	0	0	0	0	0	0	1	1	0	0	0	0	0
JY-2018_refine.110.Bac	River Group	Proteobacteria	Alphaproteobacteria	Rhizobiales	Beijerinckiaceae	unclassified_Beijerinckiaceae	unclassified_Beijerinckiaceae	0	0	0	0	0	0	0	0	0	0	0	0	0	0	0	0	0	0	0	0	0	0	0	0	0	0	0	0	0	0	0	0	0	0	0	2	0	1	0	0	0	0
JY-2018_refine.122-0.Bac	River Group	Verrucomicrobiota	Verrucomicrobiae	Verrucomicrobiales	Verrucomicrobiaceae	Prosthecobacter	unclassified_Prosthecobacter	0	0	0	0	0	0	0	0	0	0	0	0	0	0	0	0	0	0	0	0	0	0	0	0	0	0	0	0	0	0	0	0	0	0	0	5	0	0	0	0	0	0
JY-2018_refine.125-0.Bac	River Group	Proteobacteria	Alphaproteobacteria	Sphingomonadales	Sphingomonadaceae	Porphyrobacter	unclassified_Porphyrobacter	0	0	0	0	0	0	0	0	0	0	0	0	0	0	0	0	0	0	3	0	0	0	0	0	0	0	0	0	0	0	0	0	0	0	0	1	0	0	0	0	0	0
JY-2018_refine.131-0.Bac	River Group	Proteobacteria	Gammaproteobacteria	Betaproteobacteriales	Burkholderiaceae	unclassified_Burkholderiaceae	unclassified_Burkholderiaceae	0	0	0	0	0	0	0	0	0	0	0	0	0	0	0	0	0	0	0	0	0	0	0	1	0	0	0	0	0	0	0	0	0	0	0	2	0	2	0	0	0	0
JY-2018_refine.132-0.Bac	River Group	Bacteroidota	Bacteroidia	Flavobacteriales	Crocinitomicaceae	unclassified_Crocinitomicaceae	unclassified_Crocinitomicaceae	0	0	0	0	0	0	0	0	0	0	0	0	0	0	0	0	0	0	0	0	0	0	0	0	0	0	0	0	0	0	0	0	0	0	0	3	0	0	0	0	0	0
JY-2018_refine.139.Bac	River Group	Proteobacteria	Gammaproteobacteria	Betaproteobacteriales	Burkholderiaceae	UBA3064	unclassified_UBA3064	0	0	0	0	0	0	0	0	0	0	0	0	0	0	0	0	0	0	0	0	0	0	0	2	0	0	0	0	0	0	0	0	0	0	0	4	0	0	0	0	0	0
JY-2018_refine.14.Bac	River Group	Proteobacteria	Alphaproteobacteria	Sphingomonadales	Sphingomonadaceae	UBA1936	unclassified_UBA1936	0	0	0	0	0	0	0	0	0	0	0	0	0	0	0	0	0	0	2	0	0	0	0	0	0	0	0	0	0	0	0	0	0	0	0	6	0	0	0	0	0	0
JY-2018_refine.140.Bac	River Group	Bacteroidota	Bacteroidia	Flavobacteriales	Cryomorphaceae	unclassified_Cryomorphaceae	unclassified_Cryomorphaceae	0	0	0	0	0	0	0	0	0	0	0	0	0	0	0	0	0	0	0	0	0	0	0	0	0	0	0	0	0	0	0	0	0	0	0	2	1	0	0	0	0	0
JY-2018_refine.18.Bac	River Group	Bacteroidota	Bacteroidia	NS11-12g	UBA955	UBA955	unclassified_UBA955	0	0	0	0	0	0	0	0	0	0	0	0	0	0	0	0	0	0	0	0	0	0	0	0	0	0	0	0	0	0	0	0	0	0	0	3	0	0	0	0	0	0
JY-2018_refine.183-0.Bac	River Group	Actinobacteriota	Acidimicrobiia	Microtrichales	Ilumatobacteraceae	UBA2093	unclassified_UBA2093	0	0	0	0	0	0	0	0	0	0	0	0	0	0	0	0	0	0	0	0	0	0	0	1	0	0	0	0	0	0	0	0	0	0	0	1	0	0	0	0	0	0
JY-2018_refine.190-0.Bac	River Group	Proteobacteria	Gammaproteobacteria	Betaproteobacteriales	Rhodocyclaceae	unclassified_Rhodocyclaceae	unclassified_Rhodocyclaceae	0	0	0	0	0	0	0	0	1	0	0	0	0	0	0	0	0	0	0	0	0	0	0	1	0	0	0	0	0	0	0	0	0	0	0	2	0	2	0	0	0	0
JY-2018_refine.200-0.Bac	River Group	Proteobacteria	Alphaproteobacteria	Sphingomonadales	Sphingomonadaceae	UBA1936	unclassified_UBA1936	0	0	0	0	0	0	0	0	0	0	0	0	0	0	0	0	0	0	0	0	0	0	0	1	0	0	0	0	0	0	0	0	0	0	0	2	1	0	0	0	0	0
JY-2018_refine.206-0.Bac	River Group	Bacteroidota	Bacteroidia	Flavobacteriales	UA16	unclassified_UA16	unclassified_UA16	0	0	0	0	0	0	0	0	0	0	0	0	0	0	0	0	0	0	1	0	0	0	0	1	0	0	0	0	0	0	0	0	0	0	0	3	1	0	0	0	0	0
JY-2018_refine.301.Bac	River Group	Proteobacteria	Gammaproteobacteria	Betaproteobacteriales	Rhodocyclaceae	unclassified_Rhodocyclaceae	unclassified_Rhodocyclaceae	0	0	0	0	0	0	0	0	0	0	0	0	0	0	0	0	0	0	0	0	0	0	0	0	0	0	0	0	0	0	0	0	0	0	0	3	0	3	0	0	0	0
JY-2018_refine.304.Bac	River Group	Bacteroidota	Bacteroidia	Flavobacteriales	Weeksellaceae	Cloacibacterium	unclassified_Cloacibacterium	0	0	0	0	0	0	0	0	0	0	0	1	0	0	0	0	0	0	2	0	0	0	0	0	0	0	0	0	0	0	0	0	0	0	0	2	0	0	0	0	0	0
JY-2018_refine.46.Bac	River Group	Bacteroidota	Bacteroidia	Flavobacteriales	Cryomorphaceae	Coccinistipes	unclassified_Coccinistipes	0	0	0	0	0	0	0	0	0	0	0	0	0	0	0	0	0	0	0	0	0	0	0	0	0	0	0	0	0	0	0	0	0	0	0	2	0	0	0	0	0	0
JY-2018_refine.5.Bac	River Group	Proteobacteria	Gammaproteobacteria	Betaproteobacteriales	Burkholderiaceae	Polynucleobacter	unclassified_Polynucleobacter	0	0	0	0	0	0	0	0	0	0	0	0	0	0	0	0	0	0	0	0	0	0	0	0	0	0	0	0	0	0	0	0	0	0	0	2	0	0	0	0	0	0
JY-2018_refine.52.Bac	River Group	Proteobacteria	Alphaproteobacteria	Sphingomonadales	Sphingomonadaceae	Novosphingobium	unclassified_Novosphingobium	0	0	0	0	0	0	0	0	0	0	0	0	0	0	0	0	0	0	2	0	0	0	0	2	0	0	0	0	0	0	0	0	0	0	0	2	0	0	0	0	0	0
JY-2018_refine.72.Bac	River Group	Proteobacteria	Gammaproteobacteria	Steroidobacterales	Steroidobacteraceae	UBA964	unclassified_UBA964	0	0	0	0	0	0	0	0	0	0	0	0	0	0	0	0	0	0	0	0	0	0	0	13	0	0	0	0	0	0	0	0	0	0	0	6	13	0	0	0	0	0
JY-2018_refine.78.Bac	River Group	Bacteroidota	Bacteroidia	Flavobacteriales	Crocinitomicaceae	UBA952	unclassified_UBA952	0	0	0	0	0	0	0	0	0	0	0	0	0	0	0	0	0	0	0	0	0	0	0	1	0	0	0	0	0	0	0	0	0	0	0	5	1	0	0	0	0	0
JY-2018_refine.89.Bac	River Group	Actinobacteriota	Acidimicrobiia	Microtrichales	Ilumatobacteraceae	Casp-actino8	unclassified_Casp-actino8	0	0	0	0	0	0	0	0	0	0	0	0	0	0	0	0	0	0	0	0	0	0	0	0	0	0	0	0	0	0	0	0	0	0	0	2	0	0	0	0	0	0
N-2016_refine.017.Bac	River Group	Bacteroidota	Bacteroidia	Flavobacteriales	Flavobacteriaceae	Flavobacterium	unclassified_Flavobacterium	0	0	0	0	0	0	0	0	0	0	0	0	0	0	0	0	0	0	0	0	0	0	0	0	0	0	0	0	0	0	0	0	0	0	0	6	1	0	0	0	0	0
N-2016_refine.036.Bac	River Group	Proteobacteria	Alphaproteobacteria	Sphingomonadales	Sphingomonadaceae	UBA1936	unclassified_UBA1936	0	0	0	0	0	0	0	0	0	0	0	0	0	0	0	0	0	0	2	0	0	0	0	0	0	0	0	0	0	0	0	0	0	0	0	6	0	0	0	0	0	0
N-2016_refine.063.Bac	River Group	Proteobacteria	Alphaproteobacteria	Sphingomonadales	Sphingomonadaceae	UBA1936	unclassified_UBA1936	0	0	0	0	0	0	0	0	0	0	0	0	0	0	0	0	0	0	1	0	0	0	0	0	0	0	0	0	0	0	0	0	0	0	0	3	0	0	0	0	0	0
N-2016_refine.069.Bac	River Group	Proteobacteria	Alphaproteobacteria	Sphingomonadales	Sphingomonadaceae	Novosphingobium	unclassified_Novosphingobium	0	0	0	0	0	0	0	0	0	0	0	0	0	0	0	0	0	0	2	0	0	0	0	1	0	0	0	0	0	0	0	0	0	0	0	1	0	0	0	0	0	0
N-2016_refine.081.Bac	River Group	Proteobacteria	Alphaproteobacteria	Sphingomonadales	Sphingomonadaceae	UBA1936	unclassified_UBA1936	0	0	0	0	0	0	0	0	0	0	0	0	0	0	0	0	0	0	1	0	0	0	0	0	0	0	0	0	0	0	0	0	0	0	0	3	1	0	0	0	0	0
N-2016_refine.109-0.Bac	River Group	Actinobacteriota	Actinobacteria	Actinomycetales	Microbacteriaceae	Rhodoluna	unclassified_Rhodoluna	0	0	0	0	0	0	0	0	0	0	0	0	0	0	0	0	0	0	0	0	0	0	0	0	0	0	0	0	0	0	0	0	0	0	0	1	0	0	0	0	0	0
N-2016_refine.118-0.Bac	River Group	Proteobacteria	Gammaproteobacteria	Betaproteobacteriales	Burkholderiaceae	Limnohabitans	unclassified_Limnohabitans	0	0	0	0	0	0	0	0	0	0	0	0	0	0	0	0	0	0	0	0	0	0	0	2	0	0	0	0	0	0	0	0	0	0	0	4	0	1	0	0	0	0
N-2016_refine.121-0.Bac	River Group	Bacteroidota	Bacteroidia	Flavobacteriales	Flavobacteriaceae	Flavobacterium	unclassified_Flavobacterium	0	0	0	0	0	0	0	0	0	0	0	0	0	0	0	0	0	0	1	0	0	0	0	0	0	0	0	0	0	0	0	0	0	0	0	1	1	0	0	0	0	0
N-2016_refine.123.Bac	River Group	Proteobacteria	Gammaproteobacteria	Betaproteobacteriales	Rhodocyclaceae	unclassified_Rhodocyclaceae	unclassified_Rhodocyclaceae	0	0	0	0	0	0	0	0	0	0	0	0	0	0	0	0	0	0	0	0	0	0	0	0	0	0	0	0	0	0	0	0	0	0	0	2	0	1	0	0	0	0
N-2016_refine.131.Bac	River Group	Bacteroidota	Bacteroidia	Flavobacteriales	Crocinitomicaceae	Fluviicola	unclassified_Fluviicola	0	1	0	0	0	0	0	0	0	0	0	0	0	0	0	0	0	0	0	0	0	0	0	1	0	0	0	0	0	0	0	0	0	0	0	3	1	0	0	0	0	0
N-2016_refine.138.Bac	River Group	Proteobacteria	Gammaproteobacteria	Xanthomonadales	Xanthomonadaceae	Arenimonas	unclassified_Arenimonas	0	0	0	0	0	0	0	0	0	0	0	0	0	0	0	0	0	0	0	0	0	0	0	0	0	0	0	0	0	0	0	0	0	0	0	3	1	1	0	0	0	0
N-2016_refine.143-0.Bac	River Group	Bacteroidota	Bacteroidia	Flavobacteriales	Crocinitomicaceae	UBA952	unclassified_UBA952	0	0	0	0	0	0	0	0	0	0	0	0	0	0	0	0	0	0	0	0	0	0	0	1	0	0	0	0	0	0	0	0	0	0	0	2	1	0	0	0	0	0
N-2016_refine.169-0.Bac	River Group	Bacteroidota	Bacteroidia	Sphingobacteriales	unclassified_Sphingobacteriales	unclassified_Sphingobacteriales	unclassified_Sphingobacteriales	0	0	0	0	0	0	0	0	0	0	0	0	0	0	0	0	0	0	0	0	0	0	0	0	0	0	0	0	0	0	0	0	0	0	0	4	1	0	0	0	0	0
N-2016_refine.202.Bac	River Group	Proteobacteria	Alphaproteobacteria	Rhodobacterales	Rhodobacteraceae	Pseudorhodobacter_A	unclassified_Pseudorhodobacter_A	0	0	0	0	0	0	0	0	0	0	0	0	0	0	0	0	0	0	0	0	0	0	0	2	0	0	0	0	0	0	0	0	0	0	0	4	1	0	0	0	0	0
N-2016_refine.221-0.Bac	River Group	Proteobacteria	Alphaproteobacteria	Rhodobacterales	Rhodobacteraceae	UBA1943	unclassified_UBA1943	0	0	0	0	0	0	0	0	0	0	0	0	0	0	0	0	0	0	0	0	0	0	0	1	0	0	0	0	0	0	0	0	0	0	0	4	1	0	0	0	0	0
N-2016_refine.222-0.Bac	River Group	Bacteroidota	Bacteroidia	Sphingobacteriales	Sphingobacteriaceae	unclassified_Sphingobacteriaceae	unclassified_Sphingobacteriaceae	0	0	0	0	0	0	0	0	0	0	0	0	0	0	0	0	0	0	0	0	0	0	0	0	0	0	0	0	0	0	0	0	0	0	0	4	0	0	0	0	0	0
N-2016_refine.249-0.Bac	River Group	Actinobacteriota	Actinobacteria	Actinomycetales	Microbacteriaceae	Rhodoluna	unclassified_Rhodoluna	0	0	0	0	0	0	0	0	0	0	0	0	0	0	0	0	0	0	0	0	0	0	0	0	0	0	0	0	0	0	0	0	0	0	0	0	0	0	0	0	0	0
N-2016_refine.316.Bac	River Group	Proteobacteria	Gammaproteobacteria	Betaproteobacteriales	Burkholderiaceae	Macromonas	unclassified_Macromonas	0	0	0	0	0	0	0	0	0	0	0	0	0	0	0	0	0	0	4	0	0	0	0	1	0	0	0	0	0	0	0	0	0	0	0	11	0	12	0	0	0	0
N-2016_refine.355-0.Bac	River Group	Bacteroidota	Bacteroidia	Chitinophagales	Chitinophagaceae	UBA8137	unclassified_UBA8137	0	0	0	0	0	0	0	0	0	0	0	0	0	0	0	0	0	0	0	0	0	0	0	2	0	0	0	0	0	0	0	0	0	0	0	1	1	0	0	0	0	0
N-2016_refine.377.Bac	River Group	Proteobacteria	Gammaproteobacteria	Betaproteobacteriales	Burkholderiaceae	unclassified_Burkholderiaceae	unclassified_Burkholderiaceae	0	0	0	0	0	0	0	0	0	0	0	0	0	0	0	0	0	0	0	0	0	0	0	3	0	0	0	0	0	0	0	0	0	0	0	4	0	0	0	0	0	0
N-2016_refine.389.Bac	River Group	Bacteroidota	Bacteroidia	Flavobacteriales	Cryomorphaceae	Coccinistipes	unclassified_Coccinistipes	0	0	0	0	0	0	0	0	0	0	0	0	0	0	0	0	0	0	0	0	0	0	0	0	0	0	0	0	0	0	0	0	0	0	0	3	1	0	0	0	0	0
N-2016_refine.402.Bac	River Group	Bacteroidota	Bacteroidia	Chitinophagales	Chitinophagaceae	UBA8137	unclassified_UBA8137	0	0	0	0	0	0	0	0	0	0	0	0	0	0	0	0	0	0	0	0	0	0	0	0	0	0	0	0	0	0	0	0	0	0	0	2	3	0	0	0	0	0
N-2016_refine.403.Bac	River Group	Bacteroidota	Bacteroidia	Chitinophagales	Chitinophagaceae	UBA8137	unclassified_UBA8137	0	0	0	0	0	0	0	0	0	0	0	0	0	0	0	0	0	0	0	0	0	0	0	1	0	0	0	0	0	0	0	0	0	0	0	3	1	0	0	0	0	0
N-2016_refine.410.Bac	River Group	Bacteroidota	Bacteroidia	NS11-12g	UBA955	unclassified_UBA955	unclassified_UBA955	0	0	0	0	0	0	0	0	0	0	0	0	0	0	0	0	0	0	0	0	0	0	0	0	0	0	0	0	0	0	1	0	0	0	0	5	0	0	0	0	0	0
N-2016_refine.447-0.Bac	River Group	Proteobacteria	Gammaproteobacteria	Betaproteobacteriales	Burkholderiaceae	Polynucleobacter	unclassified_Polynucleobacter	0	0	0	0	0	0	0	0	0	0	0	0	0	0	0	0	0	0	0	0	0	0	0	1	0	0	0	0	0	0	0	0	0	0	0	3	0	1	0	0	0	0
N-2016_refine.504-0.Bac	River Group	Actinobacteriota	Actinobacteria	Actinomycetales	Microbacteriaceae	Rhodoluna	Rhodoluna planktonica	0	0	0	0	0	0	0	0	0	0	0	0	0	0	0	0	0	0	0	0	0	0	0	0	0	0	0	0	0	0	0	0	0	0	0	0	0	0	0	0	0	0
N-2016_refine.517.Bac	River Group	Bacteroidota	Bacteroidia	AKYH767	b-17BO	UBA2475	unclassified_UBA2475	0	0	0	0	0	0	0	0	0	0	0	0	0	0	0	0	0	0	2	0	0	0	0	1	0	0	0	0	0	0	0	0	0	0	0	5	0	0	0	0	0	0
N-2016_refine.528-0.Bac	River Group	Actinobacteriota	Actinobacteria	Actinomycetales	Microbacteriaceae	Rhodoluna	unclassified_Rhodoluna	0	0	0	0	0	0	0	0	0	0	0	0	0	0	0	0	0	0	0	0	0	0	0	0	0	0	0	0	0	0	0	0	0	0	0	1	0	0	0	0	0	0
P-2016_refine.006.Bac	River Group	Proteobacteria	Gammaproteobacteria	Betaproteobacteriales	Burkholderiaceae	Limnohabitans	unclassified_Limnohabitans	0	0	0	0	0	0	0	0	0	0	0	0	0	0	0	0	0	0	0	0	0	0	0	1	0	0	0	0	0	0	0	0	0	0	0	5	0	1	0	0	0	0
P-2016_refine.012.Bac	River Group	Verrucomicrobiota	Verrucomicrobiae	Opitutales	UBA953	UBA953	unclassified_UBA953	0	0	0	0	0	0	0	0	0	0	0	0	0	0	0	0	0	0	0	0	0	0	0	1	0	0	0	0	0	0	0	0	0	0	0	2	0	0	0	0	0	0
P-2016_refine.021.Bac	River Group	Proteobacteria	Alphaproteobacteria	Sphingomonadales	Sphingomonadaceae	Novosphingobium	unclassified_Novosphingobium	0	0	0	0	0	0	0	0	0	0	0	0	0	0	0	0	0	0	2	0	0	0	0	1	0	0	0	0	0	0	0	0	0	0	0	1	0	0	0	0	0	0
P-2016_refine.027.Bac	River Group	Actinobacteriota	Actinobacteria	Actinomycetales	Microbacteriaceae	unclassified_Microbacteriaceae	unclassified_Microbacteriaceae	0	0	0	0	0	0	0	0	0	0	0	0	0	0	0	0	0	0	0	0	0	0	0	0	0	0	0	0	0	0	0	0	0	0	0	0	0	0	0	0	0	0
P-2016_refine.039.Bac	River Group	Verrucomicrobiota	Verrucomicrobiae	Verrucomicrobiales	Akkermansiaceae	UBA956	unclassified_UBA956	0	0	0	0	0	0	0	0	0	0	0	0	0	0	0	0	0	0	0	0	0	0	0	0	0	0	0	0	0	0	0	0	0	0	0	4	0	0	0	0	0	0
P-2016_refine.070-0.Bac	River Group	Proteobacteria	Alphaproteobacteria	Sphingomonadales	Sphingomonadaceae	Novosphingobium	unclassified_Novosphingobium	0	0	0	0	0	0	0	0	0	0	0	0	0	0	0	0	0	0	2	0	0	0	0	1	0	0	0	0	0	0	0	0	0	0	0	2	0	0	0	0	0	0
P-2016_refine.083-0.Bac	River Group	Bacteroidota	Bacteroidia	NS11-12g	UBA955	unclassified_UBA955	unclassified_UBA955	0	0	0	0	0	0	0	0	0	0	0	0	0	0	0	0	0	0	1	0	0	0	0	0	0	0	0	0	0	0	0	0	0	0	0	3	0	0	0	0	0	0
P-2016_refine.096.Bac	River Group	Proteobacteria	Alphaproteobacteria	Rhodobacterales	Rhodobacteraceae	Pseudorhodobacter_A	unclassified_Pseudorhodobacter_A	0	0	0	0	0	0	0	0	0	0	0	0	0	0	0	0	0	0	0	0	0	0	0	2	0	0	0	0	0	0	0	0	0	0	0	4	1	0	0	0	0	0
P-2016_refine.128-0.Bac	River Group	Bacteroidota	Bacteroidia	Flavobacteriales	Flavobacteriaceae	Flavobacterium	unclassified_Flavobacterium	0	0	0	0	0	0	0	0	0	0	0	0	0	0	0	0	0	0	0	0	0	0	0	0	0	0	0	0	0	0	0	0	0	0	0	2	0	0	0	0	0	0
P-2016_refine.136-0.Bac	River Group	Bacteroidota	Bacteroidia	Flavobacteriales	Crocinitomicaceae	unclassified_Crocinitomicaceae	unclassified_Crocinitomicaceae	0	0	0	0	0	0	0	0	0	0	0	0	0	0	0	0	0	0	0	0	0	0	0	0	0	0	0	0	0	0	0	0	0	0	0	3	0	0	0	0	0	0
P-2016_refine.162.Bac	River Group	Bacteroidota	Bacteroidia	Flavobacteriales	UA16	unclassified_UA16	unclassified_UA16	0	0	0	0	0	0	0	0	0	0	0	0	0	0	0	0	0	0	1	0	0	0	0	0	0	0	0	0	0	0	0	0	0	0	0	8	1	0	0	0	0	0
P-2016_refine.172-0.Bac	River Group	Actinobacteriota	Actinobacteria	Actinomycetales	Microbacteriaceae	Rhodoluna	unclassified_Rhodoluna	0	0	0	0	0	0	0	0	0	0	0	0	0	0	0	0	0	0	0	0	0	0	0	0	0	0	0	0	0	0	0	0	0	0	0	0	0	0	0	0	0	0
P-2016_refine.186-0.Bac	River Group	Bacteroidota	Bacteroidia	Cytophagales	Spirosomaceae	Emticicia	unclassified_Emticicia	0	0	0	0	0	0	0	0	0	0	0	0	0	0	0	0	0	0	2	0	0	0	0	0	0	0	0	0	0	0	0	0	0	0	0	5	2	0	0	0	0	0
P-2016_refine.187.Bac	River Group	Proteobacteria	Alphaproteobacteria	Sphingomonadales	Sphingomonadaceae	UBA1936	unclassified_UBA1936	0	0	0	0	0	0	0	0	0	0	0	0	0	0	0	0	0	0	1	0	0	0	0	0	0	0	0	0	0	0	0	0	0	0	0	3	0	0	0	0	0	0
P-2016_refine.195-0.Bac	River Group	Proteobacteria	Gammaproteobacteria	Betaproteobacteriales	Methylophilaceae	Methylophilus	unclassified_Methylophilus	0	0	0	0	0	0	0	0	0	0	0	0	0	0	0	0	0	0	0	0	0	0	0	1	0	0	0	0	0	0	0	0	0	0	0	3	0	1	0	0	0	0
P-2016_refine.205-0.Bac	River Group	Proteobacteria	Alphaproteobacteria	Sphingomonadales	Sphingomonadaceae	Ga0077559	unclassified_Ga0077559	0	0	0	0	0	0	0	0	0	0	0	0	0	0	0	0	0	0	1	0	0	0	0	1	0	0	0	0	0	0	0	0	0	0	0	0	0	0	0	0	0	0
P-2016_refine.218.Bac	River Group	Bacteroidota	Bacteroidia	Flavobacteriales	Cryomorphaceae	unclassified_Cryomorphaceae	unclassified_Cryomorphaceae	0	0	0	0	0	0	0	0	0	0	0	0	0	0	0	0	0	0	0	0	0	0	0	0	0	0	0	0	0	0	0	0	0	0	0	1	1	0	0	0	0	0
P-2016_refine.229.Bac	River Group	Bacteroidota	Bacteroidia	Flavobacteriales	Cryomorphaceae	Coccinistipes	unclassified_Coccinistipes	0	0	0	0	0	0	0	0	0	0	0	0	0	0	0	0	0	0	0	0	0	0	0	0	0	0	0	0	0	0	0	0	0	0	0	3	1	0	0	0	0	0
P-2016_refine.292.Bac	River Group	Bacteroidota	Bacteroidia	Flavobacteriales	Flavobacteriaceae	Flavobacterium	unclassified_Flavobacterium	0	0	0	0	0	0	0	0	0	0	0	0	0	0	0	0	0	0	1	0	0	0	0	0	0	0	0	0	0	0	0	0	0	0	0	4	1	1	0	0	0	0
SC-2017_refine.028.Bac	River Group	Proteobacteria	Gammaproteobacteria	Betaproteobacteriales	Burkholderiaceae	unclassified_Burkholderiaceae	unclassified_Burkholderiaceae	0	0	0	0	0	0	0	0	0	0	0	0	0	0	0	0	0	0	0	0	0	0	0	1	0	0	0	0	0	0	0	0	0	0	0	5	0	1	0	0	0	0
SC-2017_refine.029-0.Bac	River Group	Actinobacteriota	Actinobacteria	Corynebacteriales	Corynebacteriaceae	Mycobacterium	unclassified_Mycobacterium	0	0	0	0	0	0	0	0	0	0	0	0	0	0	0	0	0	0	0	0	0	0	0	1	0	0	0	0	0	0	0	0	0	0	0	2	0	0	0	0	0	0
SC-2017_refine.032.Bac	River Group	Actinobacteriota	Acidimicrobiia	Microtrichales	Ilumatobacteraceae	UBA2093	unclassified_UBA2093	0	0	0	0	0	0	0	0	0	0	0	0	0	0	0	0	0	0	0	0	0	0	0	1	0	0	0	0	0	0	0	0	0	0	0	5	0	0	0	0	0	0
SC-2017_refine.033-0.Bac	River Group	Proteobacteria	Alphaproteobacteria	Sphingomonadales	Sphingomonadaceae	Novosphingobium	unclassified_Novosphingobium	0	0	0	0	0	0	0	0	0	0	0	0	0	0	0	0	0	0	2	0	0	0	0	0	0	0	0	0	0	0	0	0	0	0	0	2	0	0	0	0	0	0
SC-2017_refine.052-0.Bac	River Group	Actinobacteriota	Actinobacteria	Actinomycetales	Microbacteriaceae	unclassified_Microbacteriaceae	unclassified_Microbacteriaceae	0	0	0	0	0	0	0	0	0	0	0	0	0	0	0	0	0	0	0	0	0	0	0	0	0	0	0	0	0	0	0	0	0	0	0	0	0	0	0	0	0	0
SC-2017_refine.059.Bac	River Group	Proteobacteria	Gammaproteobacteria	Betaproteobacteriales	Rhodocyclaceae	unclassified_Rhodocyclaceae	unclassified_Rhodocyclaceae	0	0	0	0	0	0	0	0	0	0	0	0	0	0	0	0	0	0	0	0	0	0	0	0	0	0	0	0	0	0	0	0	0	0	0	2	0	5	0	0	0	0
SC-2017_refine.071-0.Bac	River Group	Proteobacteria	Alphaproteobacteria	Sphingomonadales	Sphingomonadaceae	Novosphingobium	unclassified_Novosphingobium	0	0	0	0	0	0	0	0	0	0	0	0	0	0	0	0	0	0	1	0	0	0	0	0	0	0	0	0	0	0	0	0	0	0	0	1	0	0	0	0	0	0
SC-2017_refine.077-0.Bac	River Group	Bacteroidota	Bacteroidia	Flavobacteriales	Weeksellaceae	Cloacibacterium	unclassified_Cloacibacterium	0	0	0	0	0	0	0	0	0	0	0	0	0	0	0	0	0	0	0	0	0	0	0	0	0	0	0	0	0	0	1	0	0	0	0	2	2	0	0	0	0	0
SC-2017_refine.104.Bac	River Group	Actinobacteriota	Acidimicrobiia	Microtrichales	Ilumatobacteraceae	UBA2093	unclassified_UBA2093	0	0	0	0	0	0	0	0	0	0	0	0	0	0	0	0	0	0	0	0	0	0	0	1	0	0	0	0	0	0	0	0	0	0	0	4	0	0	0	0	0	0
SC-2017_refine.106-0.Bac	River Group	Proteobacteria	Alphaproteobacteria	Sphingomonadales	Sphingomonadaceae	Novosphingobium	unclassified_Novosphingobium	0	0	0	0	0	0	0	0	0	0	0	0	0	0	0	0	0	0	2	0	0	0	0	1	0	0	0	0	0	0	0	0	0	0	0	2	0	0	0	0	0	0
SC-2017_refine.114-0.Bac	River Group	Proteobacteria	Gammaproteobacteria	Betaproteobacteriales	Burkholderiaceae	unclassified_Burkholderiaceae	unclassified_Burkholderiaceae	0	0	0	0	0	0	0	0	0	0	0	0	0	0	0	0	0	0	0	0	0	0	0	6	0	0	0	0	1	0	0	0	0	0	0	31	6	9	0	0	0	0
SC-2017_refine.132-0.Bac	River Group	Actinobacteriota	Acidimicrobiia	Microtrichales	Ilumatobacteraceae	Casp-actino8	unclassified_Casp-actino8	0	0	0	0	0	0	0	0	0	0	0	0	0	0	0	0	0	0	0	0	0	0	0	0	0	0	0	0	0	0	0	0	0	0	0	2	0	0	0	0	0	0
SC-2017_refine.138-0.Bac	River Group	Bacteroidota	Bacteroidia	AKYH767	b-17BO	UBA2475	unclassified_UBA2475	0	0	0	0	0	0	0	0	0	0	0	0	0	0	0	0	0	0	0	0	0	0	0	3	0	0	0	0	0	0	0	0	0	0	0	3	0	0	0	0	0	0
SC-2017_refine.147-0.Bac	River Group	Proteobacteria	Gammaproteobacteria	Betaproteobacteriales	Burkholderiaceae	Limnohabitans	unclassified_Limnohabitans	0	0	0	0	0	0	0	0	0	0	0	0	0	0	0	0	0	0	0	0	0	0	0	2	0	0	0	0	0	0	0	0	0	0	0	4	0	2	0	0	0	0
SC-2017_refine.150-0.Bac	River Group	Proteobacteria	Gammaproteobacteria	Betaproteobacteriales	Rhodocyclaceae	unclassified_Rhodocyclaceae	unclassified_Rhodocyclaceae	0	0	0	0	0	0	0	0	0	0	0	0	0	0	0	0	0	0	0	0	0	0	0	0	0	0	0	0	0	0	0	0	0	0	0	5	0	4	0	0	0	0
SC-2017_refine.168-0.Bac	River Group	Bacteroidota	Bacteroidia	NS11-12g	UBA955	unclassified_UBA955	unclassified_UBA955	0	0	0	0	0	0	0	0	0	0	0	0	0	0	0	0	0	0	1	0	0	0	0	1	0	0	0	0	0	0	0	0	0	0	0	2	1	0	0	0	0	0
SC-2017_refine.187.Bac	River Group	Proteobacteria	Gammaproteobacteria	Betaproteobacteriales	Burkholderiaceae	UBA3064	unclassified_UBA3064	0	0	0	0	0	0	0	0	0	0	0	0	0	0	0	0	0	0	0	0	0	0	0	2	0	0	0	0	0	0	0	0	0	0	0	4	0	1	0	0	0	0
SC-2017_refine.192-0.Bac	River Group	Actinobacteriota	Acidimicrobiia	Microtrichales	Ilumatobacteraceae	unclassified_Ilumatobacteraceae	unclassified_Ilumatobacteraceae	0	1	0	0	0	0	0	0	0	0	0	0	0	0	0	0	0	0	0	0	0	0	0	0	0	0	0	0	0	0	0	0	0	0	0	3	0	0	0	0	0	0
SC-2017_refine.204-0.Bac	River Group	Bacteroidota	Bacteroidia	Flavobacteriales	Crocinitomicaceae	unclassified_Crocinitomicaceae	unclassified_Crocinitomicaceae	0	1	0	0	0	0	0	0	0	0	0	0	0	0	0	0	0	0	0	0	0	0	0	0	0	0	0	0	0	0	1	0	0	0	0	2	1	0	0	0	0	0
SC-2017_refine.215-0.Bac	River Group	Bacteroidota	Bacteroidia	Chitinophagales	Chitinophagaceae	unclassified_Chitinophagaceae	unclassified_Chitinophagaceae	0	0	0	0	0	0	0	0	0	0	0	0	0	0	0	0	0	0	0	0	0	0	0	0	0	0	0	0	0	0	0	0	0	0	0	2	0	0	0	0	0	0
SC-2017_refine.231.Bac	River Group	Bacteroidota	Bacteroidia	Cytophagales	Cyclobacteriaceae	Algoriphagus	unclassified_Algoriphagus	0	0	0	0	0	0	0	0	0	0	0	0	0	0	0	0	0	0	0	0	0	0	0	1	0	0	0	0	0	0	0	0	0	0	0	4	0	0	0	0	0	0
SC-2017_refine.235.Bac	River Group	Proteobacteria	Gammaproteobacteria	Betaproteobacteriales	Burkholderiaceae	Macromonas	unclassified_Macromonas	0	0	0	0	0	0	0	0	0	0	0	0	0	0	0	0	0	0	0	0	0	0	0	1	0	0	0	0	0	0	0	0	0	0	0	2	0	1	0	0	0	0
SC-2017_refine.243.Bac	River Group	Bacteroidota	Bacteroidia	Chitinophagales	Chitinophagaceae	unclassified_Chitinophagaceae	unclassified_Chitinophagaceae	0	0	0	0	0	0	0	0	0	0	0	0	0	0	0	0	0	0	1	0	0	0	0	1	0	0	0	0	0	1	0	0	0	0	0	3	1	0	0	0	0	0
SC-2017_refine.301-0.Bac	River Group	Proteobacteria	Gammaproteobacteria	Steroidobacterales	Steroidobacteraceae	UBA964	unclassified_UBA964	0	0	0	0	0	0	0	0	0	0	0	0	0	0	0	0	0	0	1	0	0	0	0	0	0	0	0	0	0	0	0	0	0	0	0	2	0	0	0	0	0	0
SC-2017_refine.353.Bac	River Group	Patescibacteria	Paceibacteria	UBA9983	Lloydbacteraceae	UBA6899	unclassified_UBA6899	0	0	0	0	0	0	0	0	0	0	0	0	0	0	0	0	0	0	1	0	0	0	0	0	0	0	0	0	0	0	0	0	0	0	0	0	0	0	0	0	0	0
SC-2017_refine.359.Bac	River Group	Proteobacteria	Gammaproteobacteria	Pseudomonadales	Moraxellaceae	Acinetobacter	Acinetobacter harbinensis	0	0	0	0	0	0	0	0	0	0	0	0	0	0	0	0	0	0	0	0	0	0	0	0	0	0	0	0	0	0	0	0	0	0	0	1	0	3	1	1	0	0
SJ-2017_refine.051.Bac	River Group	Proteobacteria	Gammaproteobacteria	Enterobacterales	Enterobacteriaceae	Rahnella	Rahnella aquatilis_B	0	0	0	0	0	0	0	0	0	0	0	0	0	0	0	0	0	0	0	0	0	1	0	0	0	0	0	0	0	0	0	0	0	0	0	2	0	8	0	0	0	2
SJ-2017_refine.122-0.Bac	River Group	Actinobacteriota	Actinobacteria	Corynebacteriales	Corynebacteriaceae	Mycobacterium	unclassified_Mycobacterium	0	0	0	0	0	0	0	0	0	0	0	0	0	0	0	0	0	0	0	0	0	0	0	1	0	0	0	0	0	0	0	0	0	0	0	1	0	0	0	0	0	0
SJ-2017_refine.144.Bac	River Group	Actinobacteriota	Actinobacteria	Nanopelagicales	unclassified_Nanopelagicales	unclassified_Nanopelagicales	unclassified_Nanopelagicales	0	0	0	0	0	0	0	0	0	0	0	0	0	0	0	0	0	0	0	0	0	0	0	0	0	0	0	0	0	0	0	0	0	0	0	1	0	0	0	0	0	0
SJ-2017_refine.176.Bac	River Group	Cyanobacteriota	Cyanobacteriia	Synechococcales_A	Cyanobiaceae	RCC307	unclassified_RCC307	0	0	0	0	0	0	0	0	0	0	0	0	0	0	0	0	0	0	1	0	0	0	0	0	0	0	0	0	0	0	0	0	0	0	0	3	0	0	0	0	0	0
SJ-2017_refine.184-0.Bac	River Group	Bacteroidota	Bacteroidia	Flavobacteriales	Weeksellaceae	Cloacibacterium	unclassified_Cloacibacterium	0	0	0	0	0	0	0	0	0	0	0	0	0	0	0	0	0	0	0	0	0	0	0	0	0	0	0	0	0	0	0	0	0	0	0	1	1	0	0	0	0	0
SJ-2017_refine.203-0.Bac	River Group	Proteobacteria	Alphaproteobacteria	Sphingomonadales	Sphingomonadaceae	Novosphingobium	unclassified_Novosphingobium	0	0	0	0	0	0	0	0	0	0	0	0	0	0	0	0	0	0	3	0	0	0	0	1	0	0	0	0	0	0	0	0	0	0	0	2	0	0	0	0	0	0
SJ-2017_refine.447-0.Bac	River Group	Proteobacteria	Gammaproteobacteria	Betaproteobacteriales	Burkholderiaceae	Aquabacterium	unclassified_Aquabacterium	0	0	0	0	0	0	0	0	0	0	0	0	0	0	0	0	0	0	0	0	0	0	0	0	0	0	0	0	0	0	0	0	0	0	0	7	1	0	0	0	0	0
Y-2016_refine.002.Bac	River Group	Proteobacteria	Alphaproteobacteria	Pelagibacterales	Pelagibacteraceae	Fonsibacter	Fonsibacter ubiquis	0	0	0	0	0	0	0	0	0	0	0	0	0	0	0	0	0	0	0	0	0	0	0	0	0	0	0	0	0	0	0	0	0	0	0	0	0	0	0	0	0	0
Y-2016_refine.013.Bac	River Group	Bacteroidota	Bacteroidia	Flavobacteriales	Cryomorphaceae	Coccinistipes	unclassified_Coccinistipes	0	0	0	0	0	0	0	0	0	0	0	0	0	0	0	0	0	0	0	0	0	0	0	0	0	0	0	0	0	0	0	0	0	0	0	2	1	0	0	0	0	0
Y-2016_refine.025.Bac	River Group	Proteobacteria	Gammaproteobacteria	Steroidobacterales	Steroidobacteraceae	UBA964	unclassified_UBA964	0	0	0	0	0	0	0	0	0	0	0	0	0	0	0	0	0	0	2	0	0	0	0	0	0	0	0	0	0	0	0	0	0	0	0	4	0	0	0	0	0	0
Y-2016_refine.042.Bac	River Group	Proteobacteria	Gammaproteobacteria	Betaproteobacteriales	Burkholderiaceae	UBA954	GCA_002293155.1	0	0	0	0	0	0	0	0	0	0	0	0	0	0	0	0	0	0	0	0	0	0	0	0	0	0	0	0	0	0	0	0	0	0	0	2	0	0	0	0	0	0
Y-2016_refine.046.Bac	River Group	Bacteroidota	Bacteroidia	NS11-12g	UBA955	UBA955	unclassified_UBA955	0	0	0	0	0	0	0	0	0	0	0	0	0	0	0	0	0	0	0	0	0	0	0	0	0	0	0	0	0	0	0	0	0	0	0	3	0	0	0	0	0	0
Y-2016_refine.062.Bac	River Group	Proteobacteria	Gammaproteobacteria	Steroidobacterales	Steroidobacteraceae	UBA964	GCA_002292945.1	0	0	0	0	0	0	0	0	0	0	0	0	0	0	0	0	0	0	1	0	0	0	0	0	0	0	0	0	0	0	0	0	0	0	0	3	2	0	0	0	0	0
Y-2016_refine.070.Bac	River Group	Actinobacteriota	Acidimicrobiia	Microtrichales	Ilumatobacteraceae	Casp-actino8	unclassified_Casp-actino8	0	0	0	0	0	0	0	0	0	0	0	0	0	0	0	0	0	0	0	0	0	0	0	0	0	0	0	0	0	0	0	0	0	0	0	2	0	0	0	0	0	0
Y-2016_refine.079.Bac	River Group	Bacteroidota	Bacteroidia	Flavobacteriales	Cryomorphaceae	unclassified_Cryomorphaceae	unclassified_Cryomorphaceae	0	0	0	0	0	0	0	0	0	0	0	0	0	0	0	0	0	0	0	0	0	0	0	0	0	0	0	0	0	0	0	0	0	0	0	2	1	0	0	0	0	0
Y-2016_refine.095.Bac	River Group	Proteobacteria	Alphaproteobacteria	Sphingomonadales	Sphingomonadaceae	UBA1936	unclassified_UBA1936	0	0	0	0	0	0	0	0	0	0	0	0	0	0	0	0	0	0	2	0	0	0	0	0	0	0	0	0	0	0	0	0	0	0	0	4	0	0	0	0	0	0
Y-2016_refine.100-0.Bac	River Group	Bacteroidota	Bacteroidia	Flavobacteriales	Crocinitomicaceae	UBA952	unclassified_UBA952	0	1	0	0	0	0	0	0	0	0	0	0	0	0	0	0	0	0	0	0	0	0	0	1	0	0	0	0	0	0	0	0	0	0	0	3	0	0	0	0	0	0
Y-2016_refine.115.Bac	River Group	Bacteroidota	Bacteroidia	Chitinophagales	Chitinophagaceae	unclassified_Chitinophagaceae	unclassified_Chitinophagaceae	0	0	0	0	0	0	0	0	0	0	0	0	0	0	0	0	0	0	0	0	0	0	0	0	0	0	0	0	0	0	0	0	0	0	0	2	1	0	0	0	0	0
Y-2016_refine.149.Bac	River Group	Gemmatimonadota	Gemmatimonadetes	Gemmatimonadales	Gemmatimonadaceae	Gemmatimonas	unclassified_Gemmatimonas	0	0	1	0	0	0	0	0	0	0	0	0	0	0	0	0	0	0	2	0	0	0	0	2	0	0	0	0	0	0	0	0	0	0	0	5	0	0	0	0	0	0
Y-2016_refine.159.Bac	River Group	Proteobacteria	Gammaproteobacteria	Betaproteobacteriales	Methylophilaceae	Methylopumilus_A	unclassified_Methylopumilus_A	0	0	0	0	0	0	0	0	0	0	0	0	0	0	0	0	0	0	0	0	0	0	0	1	0	0	0	0	0	0	0	0	0	0	0	1	0	1	0	0	0	0
Y-2016_refine.161-0.Bac	River Group	Actinobacteriota	Acidimicrobiia	Microtrichales	Ilumatobacteraceae	BACL27	unclassified_BACL27	0	0	0	0	0	0	0	0	0	0	0	0	0	0	0	0	0	0	0	0	0	0	0	0	0	0	0	0	0	0	0	0	0	0	0	2	0	0	0	0	0	0
Y-2016_refine.162-0.Bac	River Group	Actinobacteriota	Actinobacteria	Actinomycetales	Microbacteriaceae	Aquiluna	unclassified_Aquiluna	0	0	0	0	0	0	0	0	0	0	0	0	0	0	0	0	0	0	0	0	0	0	0	0	0	0	0	0	0	0	0	0	0	0	0	1	0	0	0	0	0	0
Y-2016_refine.163-0.Bac	River Group	Bacteroidota	Bacteroidia	Flavobacteriales	Crocinitomicaceae	UBA952	unclassified_UBA952	0	0	0	0	0	0	0	0	0	0	0	0	0	0	0	0	0	0	0	0	0	0	0	2	0	0	0	0	0	0	0	0	0	0	0	2	0	0	0	0	0	0
Y-2016_refine.165-0.Bac	River Group	Actinobacteriota	Acidimicrobiia	Microtrichales	UBA8139	UBA8139	unclassified_UBA8139	0	0	0	0	0	0	0	0	0	0	0	0	0	0	0	0	0	0	0	0	0	0	0	1	0	0	0	0	0	0	0	0	0	0	0	2	0	0	0	0	0	0
Y-2016_refine.179-0.Bac	River Group	Proteobacteria	Gammaproteobacteria	Betaproteobacteriales	Burkholderiaceae	unclassified_Burkholderiaceae	unclassified_Burkholderiaceae	0	0	0	0	0	0	0	0	0	0	0	0	0	0	0	0	0	0	0	0	0	0	0	1	0	0	0	0	0	0	0	0	0	0	0	5	0	1	0	0	0	0
Y-2016_refine.183-0.Bac	River Group	Proteobacteria	Gammaproteobacteria	Betaproteobacteriales	Burkholderiaceae	unclassified_Burkholderiaceae	unclassified_Burkholderiaceae	0	0	0	0	0	0	0	0	0	0	0	0	0	0	0	0	0	0	0	0	0	0	0	1	0	0	0	0	0	0	0	0	0	0	0	3	0	0	0	0	0	0
Y-2016_refine.184-0.Bac	River Group	Actinobacteriota	Actinobacteria	Actinomycetales	Microbacteriaceae	Rhodoluna	unclassified_Rhodoluna	0	0	0	0	0	0	0	0	0	0	0	0	0	0	0	0	0	0	0	0	0	0	0	0	0	0	0	0	0	0	0	0	0	0	0	0	0	0	0	0	0	0
Y-2016_refine.189-0.Bac	River Group	Proteobacteria	Alphaproteobacteria	Rhodobacterales	Rhodobacteraceae	Tabrizicola	unclassified_Tabrizicola	0	0	0	0	0	0	0	0	0	0	0	0	0	0	0	0	0	0	0	0	0	0	0	0	0	0	0	0	0	0	0	0	0	0	0	5	1	0	0	0	0	0
Y-2016_refine.191-0.Bac	River Group	Verrucomicrobiota	Verrucomicrobiae	Verrucomicrobiales	Akkermansiaceae	UBA1315	unclassified_UBA1315	0	0	0	0	0	0	0	0	0	0	0	0	0	0	0	0	0	0	0	0	0	0	0	0	0	0	0	0	0	0	0	0	0	0	0	2	0	0	0	0	0	0
Y-2016_refine.192-0.Bac	River Group	Proteobacteria	Alphaproteobacteria	Sphingomonadales	Sphingomonadaceae	Sandarakinorhabdus	Sandarakinorhabdus limnophila	0	0	0	0	0	0	0	0	0	0	0	0	0	0	0	0	0	0	1	0	0	0	0	1	0	0	0	0	0	0	0	0	0	0	0	2	1	1	0	0	0	0
Y-2016_refine.197.Bac	River Group	Proteobacteria	Gammaproteobacteria	Betaproteobacteriales	Burkholderiaceae	UBA3064	unclassified_UBA3064	0	0	0	0	0	0	0	0	0	0	0	0	0	0	0	0	0	0	0	0	0	0	0	2	0	0	0	0	0	0	0	0	0	0	0	3	0	0	0	0	0	0
Y-2016_refine.205-0.Bac	River Group	Planctomycetota	Planctomycetes	Pirellulales	Pirellulaceae	Pirellula	unclassified_Pirellula	0	0	0	0	0	0	0	0	0	0	0	0	0	0	0	0	0	0	0	0	0	0	0	0	0	0	0	0	0	0	0	0	0	0	0	1	1	2	0	0	0	0
Y-2016_refine.207-0.Bac	River Group	Proteobacteria	Alphaproteobacteria	Rickettsiales	Rickettsiaceae	GCA-2402195	unclassified_GCA-2402195	0	0	0	0	0	0	0	0	0	0	0	0	0	0	0	0	0	0	0	0	0	0	0	0	0	0	0	0	0	0	1	0	0	0	0	1	0	0	0	0	0	0
Y-2016_refine.213-0.Bac	River Group	Planctomycetota	Phycisphaerae	Phycisphaerales	SM1A02	unclassified_SM1A02	unclassified_SM1A02	0	0	0	0	0	0	0	0	0	0	0	0	0	0	0	0	0	0	0	0	0	0	0	0	0	0	0	0	0	0	0	0	0	0	0	1	0	1	0	0	0	0
Y-2016_refine.215.Bac	River Group	Bacteroidota	Bacteroidia	NS11-12g	UBA955	unclassified_UBA955	unclassified_UBA955	0	0	0	0	0	0	0	0	0	0	0	0	0	0	0	0	0	0	0	0	0	0	0	0	0	0	0	0	0	0	0	0	0	0	0	16	14	0	0	0	0	0
Y-2016_refine.220-0.Bac	River Group	Proteobacteria	Alphaproteobacteria	Paracaedibacterales	UBA11393	unclassified_UBA11393	unclassified_UBA11393	0	0	0	0	0	0	0	0	0	0	0	0	0	0	0	0	0	0	0	0	0	0	0	0	0	0	0	0	0	0	24	0	0	0	0	19	0	9	0	0	0	0
Y-2016_refine.221.Bac	River Group	Chloroflexota	Chloroflexia	Chloroflexales	Roseiflexaceae	UBA965	unclassified_UBA965	0	0	1	0	1	0	0	0	0	0	0	0	0	0	0	0	0	0	2	0	0	0	0	0	0	0	0	0	0	0	0	0	0	0	0	3	0	0	0	0	0	0
Y-2016_refine.230-0.Bac	River Group	Proteobacteria	Alphaproteobacteria	Sphingomonadales	Sphingomonadaceae	UBA1936	unclassified_UBA1936	0	0	0	0	0	0	0	0	0	0	0	0	0	0	0	0	0	0	0	0	0	0	0	0	0	0	0	0	0	0	0	0	0	0	0	6	1	0	0	0	0	0
Y-2016_refine.236-0.Bac	River Group	Proteobacteria	Alphaproteobacteria	Caulobacterales	Caulobacteraceae	Phenylobacterium	unclassified_Phenylobacterium	0	0	0	0	0	0	0	0	0	0	0	0	0	0	0	0	0	0	1	0	0	0	0	2	0	0	0	0	0	0	0	0	0	0	0	2	1	0	0	0	0	0
Y-2016_refine.251-0.Bac	River Group	Bacteroidota	Bacteroidia	Chitinophagales	Chitinophagaceae	unclassified_Chitinophagaceae	unclassified_Chitinophagaceae	0	0	0	0	0	0	0	0	0	0	0	0	0	0	0	0	0	0	0	0	0	0	0	0	0	0	0	0	0	0	0	0	0	0	0	2	1	0	0	0	0	0
Y-2016_refine.272-0.Bac	River Group	Verrucomicrobiota	Verrucomicrobiae	Pedosphaerales	UBA9464	UBA6176	unclassified_UBA6176	0	0	0	0	0	0	0	0	0	0	0	0	0	0	0	0	0	0	0	0	0	0	0	1	0	0	0	0	0	0	0	0	0	0	0	3	1	3	0	0	0	0
Y-2016_refine.275.Bac	River Group	Planctomycetota	Phycisphaerae	Phycisphaerales	SM1A02	UBA966	unclassified_UBA966	0	0	0	0	0	0	0	0	0	0	0	0	0	0	0	0	0	0	0	0	0	0	0	0	0	0	0	0	0	0	0	0	0	0	0	4	0	0	0	0	0	0
Y-2016_refine.304.Bac	River Group	Bacteroidota	Kapabacteria	Kapabacteriales	UBA961	UBA961	GCA_002293005.1	0	0	0	0	0	0	0	0	0	0	0	0	0	0	0	0	0	0	0	0	0	0	0	0	0	0	0	0	0	0	0	0	0	0	0	2	0	0	0	0	0	0
Y-2016_refine.312-0.Bac	River Group	Bacteroidota	Kapabacteria	Kapabacteriales	Kapabacteriaceae	UBA10438	unclassified_UBA10438	0	0	0	0	0	0	0	0	0	0	0	0	0	0	0	0	0	0	0	0	0	0	0	0	0	0	0	0	0	0	0	0	0	0	0	3	0	1	0	0	0	0
Y-2016_refine.337-0.Bac	River Group	Proteobacteria	Alphaproteobacteria	Caulobacterales	Hyphomonadaceae	UBA7672	unclassified_UBA7672	0	0	0	0	0	0	0	0	0	0	0	0	0	0	0	0	0	0	0	0	0	0	0	4	0	0	0	0	0	0	0	0	0	0	0	2	0	0	0	0	0	0
Y-2016_refine.356.Bac	River Group	Planctomycetota	UBA1135	UBA2386	UBA2386	unclassified_UBA2386	unclassified_UBA2386	0	0	0	0	0	0	0	0	0	0	0	0	0	0	0	0	0	0	0	0	0	0	0	0	0	0	0	0	0	0	0	0	0	0	0	3	1	1	0	0	0	0
Y-2016_refine.373.Bac	River Group	Bacteroidota	Bacteroidia	Flavobacteriales	Crocinitomicaceae	40-80	unclassified_40-80	0	0	0	0	0	0	0	0	0	0	0	0	0	0	0	0	0	0	0	0	0	0	0	1	0	0	0	0	0	0	0	0	0	0	0	3	1	0	0	0	0	0
Y-2016_refine.393.Bac	River Group	Proteobacteria	Gammaproteobacteria	Betaproteobacteriales	Burkholderiaceae	Polynucleobacter	Polynucleobacter cosmopolitanus	0	0	0	0	0	0	0	0	0	0	0	0	0	0	0	0	0	0	0	0	0	0	0	1	0	0	0	0	0	0	0	0	0	0	0	2	0	3	0	0	0	0
Y-2016_refine.431-0.Bac	River Group	Proteobacteria	Alphaproteobacteria	Sphingomonadales	Sphingomonadaceae	Novosphingobium	unclassified_Novosphingobium	0	0	0	0	0	0	0	0	0	0	0	0	0	0	0	0	0	0	2	0	0	0	0	0	0	0	0	0	0	0	0	0	0	0	0	2	0	0	0	0	0	0
Y-2016_refine.432.Bac	River Group	Bacteroidota	Bacteroidia	Chitinophagales	Chitinophagaceae	UBA8137	unclassified_UBA8137	0	0	0	0	0	0	0	0	0	0	0	0	0	0	0	0	0	0	0	0	0	0	0	1	0	0	0	0	0	0	0	0	0	0	0	2	1	0	0	0	0	0
Y-2016_refine.434-0.Bac	River Group	Proteobacteria	Gammaproteobacteria	Betaproteobacteriales	Methylophilaceae	Methylopumilus_A	unclassified_Methylopumilus_A	0	0	0	0	0	0	0	0	0	0	0	0	0	0	0	0	0	0	0	0	0	0	0	1	0	0	0	0	0	0	0	0	0	0	0	1	0	0	0	0	0	0
Y-2016_refine.465.Bac	River Group	Actinobacteriota	Actinobacteria	Nanopelagicales	Nanopelagicaceae	unclassified_Nanopelagicaceae	unclassified_Nanopelagicaceae	0	0	0	0	0	0	0	0	0	0	0	0	0	0	0	0	0	0	0	0	0	0	0	0	0	0	0	0	0	0	0	0	0	0	0	0	0	0	0	0	0	0
Y-2017_refine.013.Bac	River Group	Cyanobacteriota	Cyanobacteriia	Synechococcales_A	Cyanobiaceae	Cyanobium	unclassified_Cyanobium	0	0	0	0	0	0	0	0	0	0	0	0	0	0	0	0	0	0	1	0	0	0	0	0	0	0	0	0	0	0	0	0	0	0	0	5	0	0	0	0	0	0
Y-2017_refine.016.Bac	River Group	Planctomycetota	Planctomycetes	Planctomycetales	Planctomycetaceae	UBA10327	UBA10327 sp2	0	0	0	0	0	0	0	0	0	0	0	0	0	0	0	0	0	0	1	0	0	0	0	0	0	0	0	0	0	0	0	0	0	0	0	4	0	2	0	0	0	0
Y-2017_refine.019.Bac	River Group	Cyanobacteriota	Cyanobacteriia	Synechococcales_A	Cyanobiaceae	Cyanobium	unclassified_Cyanobium	0	0	0	0	0	0	0	0	0	0	0	0	0	0	0	0	0	0	1	0	0	0	0	0	0	0	0	0	0	0	0	0	0	0	0	2	0	0	0	0	0	0
Y-2017_refine.039.Bac	River Group	Proteobacteria	Alphaproteobacteria	Sphingomonadales	Sphingomonadaceae	UBA1936	unclassified_UBA1936	0	0	0	0	0	0	0	0	0	0	0	0	0	0	0	0	0	0	4	0	0	0	0	0	0	0	0	0	0	0	0	0	0	0	0	3	0	0	0	0	0	0
Y-2017_refine.042-0.Bac	River Group	Proteobacteria	Gammaproteobacteria	Steroidobacterales	Steroidobacteraceae	UBA964	unclassified_UBA964	0	0	0	0	0	0	0	0	0	0	0	0	0	0	0	0	0	0	0	0	0	0	0	0	0	0	0	0	0	0	0	0	0	0	0	2	1	0	0	0	0	0
Y-2017_refine.047-0.Bac	River Group	Proteobacteria	Alphaproteobacteria	Caulobacterales	Caulobacteraceae	Phenylobacterium	unclassified_Phenylobacterium	0	0	0	0	0	0	0	0	0	0	0	0	0	0	0	0	0	0	1	0	0	0	0	1	0	0	0	0	0	0	0	0	0	0	0	2	1	0	0	0	0	0
Y-2017_refine.054.Bac	River Group	Proteobacteria	Alphaproteobacteria	Rhodobacterales	Rhodobacteraceae	Tabrizicola	unclassified_Tabrizicola	0	0	0	0	0	0	0	0	0	0	0	0	0	0	0	0	0	0	0	0	0	0	0	1	0	0	0	0	0	0	0	0	0	0	0	5	1	0	0	0	0	0
Y-2017_refine.063.Bac	River Group	Proteobacteria	Gammaproteobacteria	Betaproteobacteriales	Burkholderiaceae	Polynucleobacter	unclassified_Polynucleobacter	0	0	0	0	0	0	0	0	0	0	0	0	0	0	0	0	0	0	0	0	0	0	0	1	0	0	0	0	0	0	0	0	0	0	0	1	0	1	0	0	0	0
Y-2017_refine.070.Bac	River Group	Actinobacteriota	Actinobacteria	Nanopelagicales	Nanopelagicaceae	MAG-120802	unclassified_MAG-120802	0	0	0	0	0	0	0	0	0	0	0	0	0	0	0	0	0	0	0	0	0	0	0	0	0	0	0	0	0	0	0	0	0	0	0	0	0	0	0	0	0	0
Y-2017_refine.077-0.Bac	River Group	Actinobacteriota	Actinobacteria	Nanopelagicales	Nanopelagicaceae	unclassified_Nanopelagicaceae	unclassified_Nanopelagicaceae	0	0	0	0	0	0	0	0	0	0	0	0	0	0	0	0	0	0	0	0	0	0	0	0	0	0	0	0	0	0	0	0	0	0	0	1	0	0	0	0	0	0
Y-2017_refine.092-0.Bac	River Group	Chloroflexota	Ellin6529	CSP1-4	UBA10416	UBA10416	unclassified_UBA10416	0	0	0	0	0	0	0	0	0	0	0	0	0	0	0	0	0	0	0	0	0	0	0	0	0	0	0	0	0	0	0	0	0	0	0	1	0	0	0	0	0	0
Y-2017_refine.100.Bac	River Group	Verrucomicrobiota	Verrucomicrobiae	Pedosphaerales	UBA9464	UBA9464	unclassified_UBA9464	0	0	0	0	0	0	0	0	0	0	0	0	0	0	0	0	0	0	0	0	0	0	0	0	0	0	0	0	0	0	0	0	0	0	0	3	0	1	0	0	0	0
Y-2017_refine.115.Bac	River Group	Bacteroidota	Kapabacteria	Kapabacteriales	UBA961	UBA961	GCA_002293005.1	0	0	0	0	0	0	0	0	0	0	0	0	0	0	0	0	0	0	0	0	0	0	0	0	0	0	0	0	0	0	0	0	0	0	0	3	0	0	0	0	0	0
Y-2017_refine.139.Bac	River Group	Bacteroidota	Bacteroidia	Chitinophagales	Chitinophagaceae	unclassified_Chitinophagaceae	unclassified_Chitinophagaceae	0	0	0	0	0	0	0	0	0	0	0	0	0	0	0	0	0	0	2	0	0	0	0	0	0	0	0	0	0	1	0	0	0	0	0	3	1	0	0	0	0	0
Y-2017_refine.141.Bac	River Group	Proteobacteria	Gammaproteobacteria	Betaproteobacteriales	Burkholderiaceae	UBA4615	unclassified_UBA4615	0	0	0	0	0	0	0	0	0	0	0	0	0	0	0	0	0	0	0	0	0	0	0	3	0	0	0	0	0	0	0	0	0	0	0	8	0	1	0	0	0	0
Y-2017_refine.161-0.Bac	River Group	Planctomycetota	Phycisphaerae	Phycisphaerales	SM1A02	unclassified_SM1A02	unclassified_SM1A02	0	0	0	0	0	0	0	0	0	0	0	0	0	0	0	0	0	0	0	0	0	0	0	0	0	0	0	0	0	0	0	0	0	0	0	1	0	0	0	0	0	0
Y-2017_refine.176.Bac	River Group	Bacteroidota	Bacteroidia	NS11-12g	UBA955	UBA955	unclassified_UBA955	0	0	0	0	0	0	0	0	0	0	0	0	0	0	0	0	0	0	0	0	0	0	0	0	0	0	0	0	0	0	0	0	0	0	0	3	0	0	0	0	0	0
Y-2017_refine.178-0.Bac	River Group	Proteobacteria	Gammaproteobacteria	Xanthomonadales	Xanthomonadaceae	Arenimonas	unclassified_Arenimonas	0	0	0	0	0	0	0	0	0	0	0	0	0	0	0	0	0	0	0	0	0	0	0	0	0	0	0	0	0	0	0	0	0	0	0	2	0	0	0	0	0	0
Y-2017_refine.196.Bac	River Group	Proteobacteria	Gammaproteobacteria	Betaproteobacteriales	Burkholderiaceae	Limnohabitans	unclassified_Limnohabitans	0	0	0	0	0	0	0	0	0	0	0	0	0	0	0	0	0	0	0	0	0	0	0	2	0	0	0	0	0	0	0	0	0	0	0	4	0	0	0	0	0	0
Y-2017_refine.215.Bac	River Group	Proteobacteria	Gammaproteobacteria	Betaproteobacteriales	Burkholderiaceae	UBA3064	unclassified_UBA3064	0	0	0	0	0	0	0	0	0	0	0	0	0	0	0	0	0	0	1	0	0	0	0	3	0	0	0	0	0	0	0	0	0	0	0	3	0	1	0	0	0	0
Y-2017_refine.290.Bac	River Group	Bacteroidota	Bacteroidia	Chitinophagales	Chitinophagaceae	unclassified_Chitinophagaceae	unclassified_Chitinophagaceae	0	0	0	0	0	0	0	0	0	0	0	0	0	0	0	0	0	0	0	0	0	0	0	0	0	0	0	0	0	0	0	0	0	0	0	0	1	0	0	0	0	0
Y-2017_refine.331-0.Bac	River Group	Proteobacteria	Alphaproteobacteria	Rickettsiales	Rickettsiaceae	GCA-2402195	unclassified_GCA-2402195	0	0	0	0	0	0	0	0	0	0	0	0	0	0	0	0	0	0	0	0	0	0	0	0	0	0	0	0	0	0	1	0	0	0	0	1	0	0	0	0	0	0
Y-2017_refine.342-0.Bac	River Group	Proteobacteria	Gammaproteobacteria	Betaproteobacteriales	Burkholderiaceae	Polynucleobacter	unclassified_Polynucleobacter	0	0	0	0	0	0	0	0	0	0	0	0	0	0	0	0	0	0	0	0	0	0	0	0	0	0	0	0	0	0	0	0	0	0	0	2	0	1	0	0	0	0
Y-2017_refine.364.Bac	River Group	Proteobacteria	Gammaproteobacteria	Betaproteobacteriales	Rhodocyclaceae	unclassified_Rhodocyclaceae	unclassified_Rhodocyclaceae	0	0	0	0	0	0	0	0	0	0	0	0	0	0	0	0	0	0	0	0	0	0	0	0	0	0	0	0	0	0	0	0	0	0	0	2	0	1	0	0	0	0
Y-2017_refine.385.Bac	River Group	Proteobacteria	Gammaproteobacteria	Betaproteobacteriales	Burkholderiaceae	Polynucleobacter	unclassified_Polynucleobacter	0	0	0	0	0	0	0	0	0	0	0	0	0	0	0	0	0	0	1	0	0	0	0	1	0	0	0	0	0	0	0	0	0	0	0	6	0	1	0	0	0	0
Y-2017_refine.455-0.Bac	River Group	Bacteroidota	Bacteroidia	Flavobacteriales	Weeksellaceae	Cloacibacterium	unclassified_Cloacibacterium	0	0	0	0	0	0	0	0	0	0	0	1	0	0	0	0	0	0	1	0	0	0	0	1	0	0	0	0	0	0	0	0	0	0	0	2	1	0	0	0	0	0
YA-2016_refine.006.Bac	River Group	Bacteroidota	Bacteroidia	Flavobacteriales	Flavobacteriaceae	Flavobacterium	unclassified_Flavobacterium	0	0	0	0	0	0	0	0	0	0	0	0	0	0	0	0	0	0	0	0	0	0	0	0	0	0	0	0	0	0	0	0	0	0	0	4	1	0	0	0	0	0
YA-2016_refine.012.Bac	River Group	Proteobacteria	Gammaproteobacteria	Betaproteobacteriales	Burkholderiaceae	Polynucleobacter	unclassified_Polynucleobacter	0	0	0	0	0	0	0	0	0	0	0	0	0	0	0	0	0	0	0	0	0	0	0	1	0	0	0	0	0	0	0	0	0	0	0	2	0	0	0	0	0	0
YA-2016_refine.016.Bac	River Group	Actinobacteriota	Actinobacteria	Actinomycetales	Microbacteriaceae	Rhodoluna	unclassified_Rhodoluna	0	0	0	0	0	0	0	0	0	0	0	0	0	0	0	0	0	0	0	0	0	0	0	0	0	0	0	0	0	0	0	0	0	0	0	0	0	0	0	0	0	0
YA-2016_refine.022.Bac	River Group	Bacteroidota	Bacteroidia	Flavobacteriales	Crocinitomicaceae	Fluviicola	unclassified_Fluviicola	0	1	0	0	0	0	0	0	0	0	0	0	0	0	0	0	0	0	0	0	0	0	0	1	0	0	0	0	0	0	0	0	0	0	0	4	1	0	0	0	0	0
YA-2016_refine.032.Bac	River Group	Actinobacteriota	Actinobacteria	Actinomycetales	Microbacteriaceae	unclassified_Microbacteriaceae	unclassified_Microbacteriaceae	0	0	0	0	0	0	0	0	0	0	0	0	0	0	0	0	0	0	0	0	0	0	0	0	0	0	0	0	0	0	0	0	0	0	0	0	0	0	0	0	0	0
YA-2016_refine.048-0.Bac	River Group	Bacteroidota	Bacteroidia	Flavobacteriales	Flavobacteriaceae	Flavobacterium	unclassified_Flavobacterium	0	0	0	0	0	0	0	0	0	0	0	0	0	0	0	0	0	0	0	0	0	0	0	0	0	0	0	0	0	0	1	0	0	0	0	3	0	0	0	0	0	0
YA-2016_refine.058-0.Bac	River Group	Actinobacteriota	Actinobacteria	Actinomycetales	Microbacteriaceae	Rhodoluna	unclassified_Rhodoluna	0	0	0	0	0	0	0	0	0	0	0	0	0	0	0	0	0	0	0	0	0	0	0	0	0	0	0	0	0	0	0	0	0	0	0	1	0	0	0	0	0	0
YA-2016_refine.076-0.Bac	River Group	Actinobacteriota	Actinobacteria	Actinomycetales	Microbacteriaceae	unclassified_Microbacteriaceae	unclassified_Microbacteriaceae	0	0	0	0	0	0	0	0	0	0	0	0	0	0	0	0	0	0	0	0	0	0	0	0	0	0	0	0	0	0	0	0	0	0	0	0	0	0	0	0	0	0
YA-2016_refine.101-0.Bac	River Group	Proteobacteria	Gammaproteobacteria	Betaproteobacteriales	Burkholderiaceae	Polynucleobacter	unclassified_Polynucleobacter	0	0	0	0	0	0	0	0	0	0	0	0	0	0	0	0	0	0	0	0	0	0	0	2	0	0	0	0	0	0	0	0	0	0	0	3	0	1	0	0	0	0
YA-2016_refine.105.Bac	River Group	Actinobacteriota	Actinobacteria	Actinomycetales	Microbacteriaceae	Rhodoluna	unclassified_Rhodoluna	0	0	0	0	0	0	0	0	0	0	0	0	0	0	0	0	0	0	0	0	0	0	0	0	0	0	0	0	0	0	0	0	0	0	0	0	0	0	0	0	0	0
YA-2016_refine.125-0.Bac	River Group	Bacteroidota	Bacteroidia	Chitinophagales	Chitinophagaceae	UBA8137	unclassified_UBA8137	0	0	0	0	0	0	0	0	0	0	0	0	0	0	0	0	0	0	0	0	0	0	0	0	0	0	0	0	0	0	0	0	0	0	0	3	1	0	0	0	0	0
YA-2016_refine.145-0.Bac	River Group	Actinobacteriota	Actinobacteria	Nanopelagicales	Nanopelagicaceae	Planktophila	unclassified_Planktophila	0	0	0	0	0	0	0	0	0	0	0	0	0	0	0	0	0	0	0	0	0	0	0	0	0	0	0	0	0	0	0	0	0	0	0	1	0	0	0	0	0	0
YA-2016_refine.146.Bac	River Group	Proteobacteria	Gammaproteobacteria	Betaproteobacteriales	Methylophilaceae	Methylopumilus_A	unclassified_Methylopumilus_A	0	0	0	0	0	0	0	0	0	0	0	0	0	0	0	0	0	0	0	0	0	0	0	1	0	0	0	0	0	0	0	0	0	0	0	1	0	0	0	0	0	0
YA-2016_refine.149.Bac	River Group	Bacteroidota	Bacteroidia	NS11-12g	UBA955	unclassified_UBA955	unclassified_UBA955	0	0	0	0	0	0	0	0	0	0	0	0	0	0	0	0	0	0	1	0	0	0	0	0	0	0	0	0	0	0	0	0	0	0	0	2	1	0	0	0	0	0
YA-2016_refine.152.Bac	River Group	Proteobacteria	Gammaproteobacteria	Betaproteobacteriales	Burkholderiaceae	unclassified_Burkholderiaceae	unclassified_Burkholderiaceae	0	0	0	0	0	0	0	0	0	0	0	0	0	0	0	0	0	0	0	0	0	0	0	1	0	0	0	0	0	0	0	0	0	0	0	3	0	2	0	0	0	0
YA-2016_refine.165.Bac	River Group	Proteobacteria	Alphaproteobacteria	Rhodobacterales	Rhodobacteraceae	Tabrizicola	unclassified_Tabrizicola	0	0	0	0	0	0	0	0	0	0	0	0	0	0	0	0	0	0	0	0	0	0	0	0	0	0	0	0	0	0	0	0	0	0	0	20	1	0	0	0	0	0
YA-2016_refine.182.Bac	River Group	Bacteroidota	Bacteroidia	Flavobacteriales	Flavobacteriaceae	Flavobacterium	unclassified_Flavobacterium	0	0	0	0	0	0	0	0	0	0	0	0	0	0	0	0	0	0	1	0	0	0	0	0	0	0	0	0	0	0	0	0	0	0	0	2	1	0	0	0	0	0
YA-2016_refine.184-0.Bac	River Group	Actinobacteriota	Actinobacteria	Actinomycetales	Microbacteriaceae	Rhodoluna	unclassified_Rhodoluna	0	0	0	0	0	0	0	0	0	0	0	0	0	0	0	0	0	0	0	0	0	0	0	0	0	0	0	0	0	0	0	0	0	0	0	1	0	0	0	0	0	0
YA-2016_refine.197-0.Bac	River Group	Proteobacteria	Gammaproteobacteria	Betaproteobacteriales	Burkholderiaceae	Limnohabitans	unclassified_Limnohabitans	0	0	0	0	0	0	0	0	0	0	0	0	0	0	0	0	0	0	0	0	0	0	0	1	0	0	0	0	0	0	0	0	0	0	0	3	1	0	0	0	0	0
YA-2016_refine.212.Bac	River Group	Proteobacteria	Alphaproteobacteria	Rhodobacterales	Rhodobacteraceae	32-66-9	unclassified_32-66-9	0	0	0	0	0	0	0	0	0	0	0	0	0	0	0	0	0	0	0	0	0	0	0	2	0	0	0	0	0	0	0	0	0	0	0	4	1	0	0	0	0	0
YA-2016_refine.217-0.Bac	River Group	Actinobacteriota	Actinobacteria	Actinomycetales	Microbacteriaceae	Rhodoluna	unclassified_Rhodoluna	0	0	0	0	0	0	0	0	0	0	0	0	0	0	0	0	0	0	0	0	0	0	0	0	0	0	0	0	0	0	0	0	0	0	0	1	0	0	0	0	0	0
YA-2016_refine.291.Bac	River Group	Bacteroidota	Bacteroidia	Flavobacteriales	Crocinitomicaceae	Fluviicola	unclassified_Fluviicola	0	1	0	0	0	0	0	0	0	0	0	0	0	0	0	0	0	0	0	0	0	0	0	1	0	0	0	0	0	0	0	0	0	0	0	3	1	0	0	0	0	0
YA-2016_refine.299.Bac	River Group	Actinobacteriota	Actinobacteria	Actinomycetales	Microbacteriaceae	Rhodoluna	unclassified_Rhodoluna	0	0	0	0	0	0	0	0	0	0	0	0	0	0	0	0	0	0	0	0	0	0	0	0	0	0	0	0	0	0	0	0	0	0	0	0	0	0	0	0	0	0
YA-2016_refine.315-0.Bac	River Group	Bacteroidota	Bacteroidia	NS11-12g	UBA955	unclassified_UBA955	unclassified_UBA955	0	0	0	0	0	0	0	0	0	0	0	0	0	0	0	0	0	0	0	0	0	0	0	0	0	0	0	0	0	0	0	0	0	0	0	3	1	0	0	0	0	0
IW-2017_refine.457-0.Bac	No Group	Bacteroidota	Bacteroidia	Chitinophagales	Chitinophagaceae	BSSC1	unclassified_BSSC1	0	0	0	0	0	0	0	0	0	0	0	0	0	0	0	0	0	0	1	0	0	0	0	2	0	0	0	0	0	0	0	0	0	0	0	2	1	0	0	0	0	0
[truncated: 59 more columns]
